# Supplementary material for: Emergence through delicate balance between the steric factor and molecular orientation: a highly bright and photostable DNA marker for real-time monitoring of cell growth dynamics
Source: Royal Society of Chemistry journal article supplement (doi:10.1039/c6cc09355h), 2017-01-01
Supplement: c6cc09355h1.pdf [file c6cc09355h1.pdf]

## Electronic Supplementary Information

**Emergence through delicate balance between the steric factor and the molecular orientation: a highly bright and photostable DNA marker for real-time monitoring of cell growth dynamics**

### Content

| S. No | Experimental Details                                                                                                                                                           | Page No. |
|-------|--------------------------------------------------------------------------------------------------------------------------------------------------------------------------------|----------|
| 1.    | Instrumentation                                                                                                                                                                | S2       |
| 2.    | Materials and methods                                                                                                                                                          | S2-S5    |
| 3.    | Optical behavior of the probes RF1-RF10 (Fig. S1-S5)                                                                                                                           | S5-S10   |
| 4.    | Theoretical studies of the probes using DFT Calculations (Fig. S6)                                                                                                             | S10      |
| 5.    | Molecular modeling and CD spectra of RF1 (Fig. S7)                                                                                                                             | S11      |
| 6.    | Table S1 showing the photophysical data of RF1/RF3                                                                                                                             | S11      |
| 7.    | Table S2 showing the lifetime data of RF1/RF4/RF7                                                                                                                              | S11      |
| 8.    | Cytotoxicity and photo-induced toxicity of RF1 (Fig. S8)                                                                                                                       | S12      |
| 8.    | Quantification of Photostability (Fig.S9-S10)                                                                                                                                  | S12-S13  |
| 11.   | Synthetic protocols, structural characterization of the precursor and the probes using $^1\text{H}/^{13}\text{C}$ NMR and HRMS spectra of synthesized compounds (Fig.S11-S55). | S14-S60  |
| 12.   | References                                                                                                                                                                     | S61      |

**Instruments:**  $^1\text{H}$  and  $^{13}\text{C}$  NMR spectra were recorded on Jeol JNM ECX 500 MHz spectrometer in  $\text{CDCl}_3$ ,  $\text{CD}_3\text{OD}$  and  $\text{DMSO-d}_6$ . FT-IR spectra were recorded on a Carry-660 FT-IR spectrometer. HRMS-ESI spectra were recorded on Bruker Maxis Impact HD instrument. Using Stuart Melting point apparatus melting points of the solid compounds were recorded. Absorption/Emission spectra were recorded on Shimadzu UV-2450 and Cary Eclipse spectrophotometer respectively, using 1 cm quartz cell with 5/5 slit widths. Lifetime and anisotropy measurements were carried out using Fluorescence Lifetime Spectrometer (Agilent technology). The cell imaging experiments were performed employing inverted fluorescent microscope (Nikon Eclipse TS100). FACS analysis was performed in flow cytometer (BD FACS Canto)

**Materials:** Solvents and chemicals were purchased from commercial resources and directly used without purification. Spectroscopic dimethyl sulfoxide (DMSO) was used for photophysical studies. Doubly ionized water used in all experiments is from Milli-Q systems. PBS (pH = 7.34, 0.1 M, 10x) was prepared using doubly ionized water. DNA (Herring Sperm, Sigma Aldrich) and RNA (Torula yeast, HiMedia lab) solutions (1 mg/mL) were prepared in PBS. Stock solutions of 5 mM for each probe were prepared in DMSO and the aliquots of DNA stock solutions (0 - 38 eq) were incubated with 10  $\mu\text{M}$  solution of each probe for absorption and emission experiments. DNA concentration was determined using absorption maxima at 260 nm by following Jose Portugal et al.<sup>1</sup>

**DFT Calculations:** The geometry of the probes **RF1-RF3** was optimized by density functional theory (DFT) with B3LYP/6-31G (d, p) basis set<sup>2,3</sup> with no symmetry constraint using Gaussian 09 suite of programmes.<sup>4</sup> Frequency calculation at the same level with the same basis set was performed to ensure that the geometries correspond to real minima. Gauss view software along with Chemcraft software was used for visualization purpose.<sup>5</sup>

**Stoichiometry and dissociation constant Calculation:** The binding stoichiometry was determined by Jobs plot and further supported by Hill plot.<sup>6,7</sup> Emission spectra were recorded by

titrating 0 – 1 mg/mL of DNA against 10  $\mu$ M of the probes **RF1-RF3**. The binding constant values of the probes **RF1-RF3** were calculated employing Benesi-Hildebrand equation.<sup>8</sup>

**Determination of the experimental limit of detection:** Experimental limit of detection was calculated using the reported procedure.<sup>9, 10</sup> DNA concentration at which emission enhancement for the probes was more than 10% of their initial emission intensity was considered as detection limit.

**Quantum yield calculation:** Quantum yield of the probes **RF1-RF3** was determined using Rhodamine 6G ( $\phi_R = 0.95$ , in ethanol) as the standard (on SHIMADZU UV-2450 spectrophotometer and Cary Eclipse spectro photometer, slit widths of excitation and emission are 5/5 respectively) using equation:

$$\phi_S = \phi_R \left( \frac{A_R}{A_S} \right) \left( \frac{D_S}{D_R} \right) \left[ \frac{n_S}{n_R} \right]^2$$

Where  $\phi_S$  and  $\phi_R$ ; the quantum yields of sample and the reference,  $A_S$  and  $A_R$ ; absorbance of the sample and the reference.  $D_S$  and  $D_R$ ; the areas of emission while  $n_S$  and  $n_R$ ; the refractive indices of the sample and reference solutions respectively.

**Extinction coefficient calculation:** The extinction coefficients were evaluated for probes **RF1-RF3** through the measurement of absorption maxima of the probes 0 – 10  $\mu$ M using 3 mL of phosphate buffer saline (PBS) and the value of the extinction coefficient was evaluated as the slope of the plot between absorption maxima versus concentrations.<sup>11, 12</sup> Similarly, the absorption spectra of the probes **RF1-RF3** were recorded by titrating their various concentration (0 – 10  $\mu$ M) against 0-38 equivalent of DNA solution and from the slope of absorbance versus concentrations graph extinction coefficients were calculated.

**Lifetime measurements:** Lifetime measurements were carried out under physiological conditions (PBS, 0.1 M, pH = 7.34) used for previous photophysical studies. Fluorescence Lifetime Spectrometer (Agilent technology) using 560 nm light emitting diode (LED) was employed to evaluate the excited state dynamics.

**Cell culture:** HeLa cells were used for cell based fluorescence characterization of probes. Cell line was procured from National Centre for Cell Science, India. Cells cultured in  $\alpha$ -MEM culture media containing L-glutamine and non-essential amino acids and supplemented with 10 % Fetal

Bovine Serum was used. Antibiotic cocktail penicillin, streptomycin and amphotericin B were used to get rid of any contaminants. Cells were maintained in 5 % CO<sub>2</sub> and 95 % air atmosphere at 37°C with 80 % humidity. Culture media was changed every third day.

**MTT assay:** For cytotoxicity testing,  $5 \times 10^3$  cells HeLa cells were seeded per well of 96 well plate and cultured for 24 h. Next day, cells were treated with **RF1** at 10  $\mu$ M concentrations for duration of 24 h at 37°C, 5% CO<sub>2</sub> atmosphere. MTT (3-5 mg/mL) was added 4 h before the completion of incubation period for measuring cytotoxicity of the probes **RF1**.<sup>13</sup> DMSO was added to lyse the cells and dissolve the formed formazan crystals. Wavelength of 565 nm was used as measurement wavelength by taking 630 nm as reference control (Tecan, M7500 pro) for optical density measurement. Cell viability was measured with respect to untreated control.

**Photobleaching resistance:** The photostability of the probe **RF1** was quantified in terms of their half-life time in solution assay. For this experiment under continuous illumination of Hg-vapor lamp (160 W,  $2.1 \times 10^3$  Lux) sample was exposed in a closed chamber. Similarly, the fixed cells were stained with **RF1** (10  $\mu$ M) and continuously exposed to PI channel using fluorescent microscope (Nikon Eclipse TS100) for duration of 10 min to get the photostability in cellular medium. Additionally, the photostability of **RF1** in the cellular medium was compared with Ethidium bromide, DAPI, and Syto-16 using a set of LEDs (LED microscope EVOS FL auto imager, Applied biosystems) for the visible light irradiation at their own excitation wavelength (RFP, DAPI, and GFP channel respectively). Fluorescence/photo bleaching was measured using Image J software. The fluorescence at 0 min was considered as 100% and fluorescence retention in each case was calculated by taking this value as reference control.

**Phototoxicity assay:**  $5 \times 10^3$  cells were incubated per well of 96-well plates with 10  $\mu$ M of **RF1** for 24 h at 37°C. Next day, a continuous exposure of LED light was given per well for 5 min in triplicates under RFP channel of LED microscope (EVOS FL auto imager). Cells without probe were also exposed for same duration of light and used as control. Cells were further incubated at 37°C for 6 h and phototoxicity was measured by MTT assay.

**Monitoring of cellular growth:**  $5 \times 10^3$  HeLa cells were seeded per well of a six-well plate in triplicates for each probe. Single cell suspension was incubated with RF1 at 10  $\mu$ M concentration for 2 h. Cells were washed twice with culture media and incubated in 37°C/5% CO<sub>2</sub> incubator

in MEM media supplemented with 10% FBS. Media was changed every third day and cells were photographed every day. Cells were visualized under fluorescent microscope (Nikon TS100) at PI filter with excitation wavelength 536 nm and emission wavelength of 617 nm. Quantitation of mean fluorescent intensity was done using image J by measuring fluorescent intensity of at least ten cells per photograph. FACS analysis was performed on trypsinized cells at 9<sup>th</sup> day in flow cytometer (BD FACS Canto) and statistics of fluorescence were recorded. Cells stained for 2 h were taken as control.

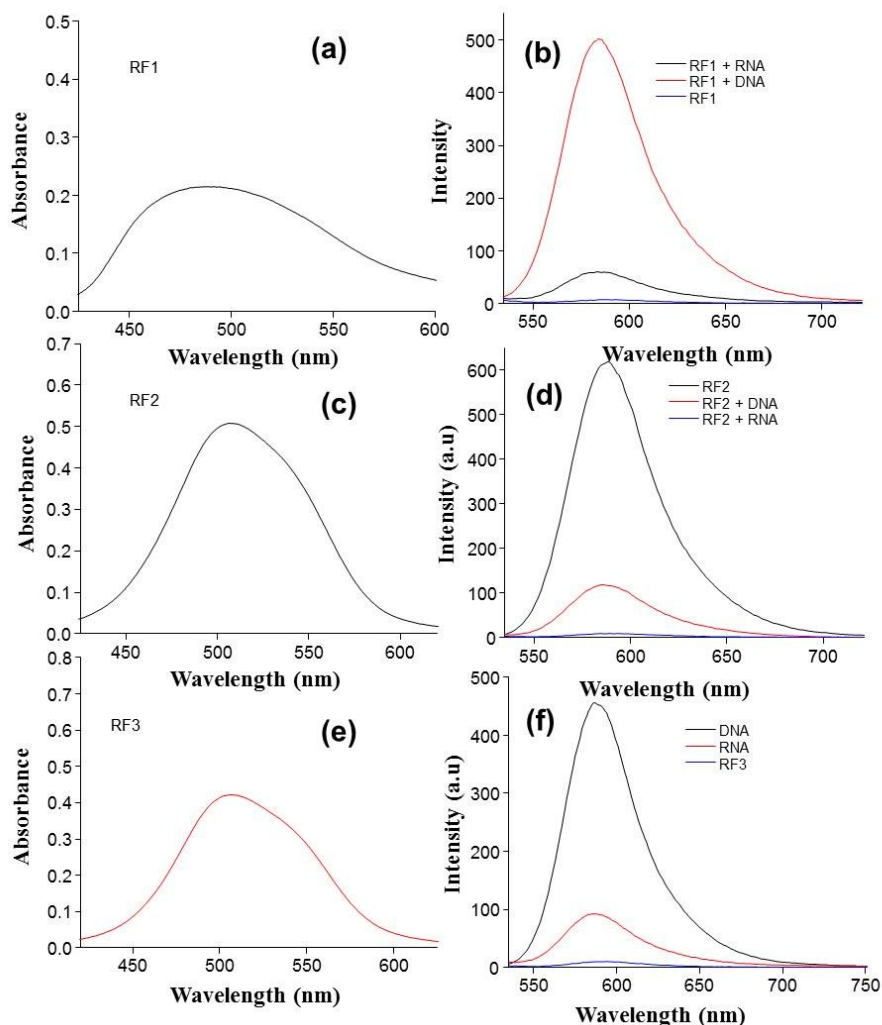

**Fig. S1: The optical responses of the probes (RF1-RF3).** a, c, e) Absorption maxima and b, d, f) emission spectra of **RF1-RF3** respectively. The optical behaviour was studied under physiological conditions (PBS, 0.1 M, pH = 7.34) using 10  $\mu$ M as the probes concentration and 1 mg/mL DNA/RNA.

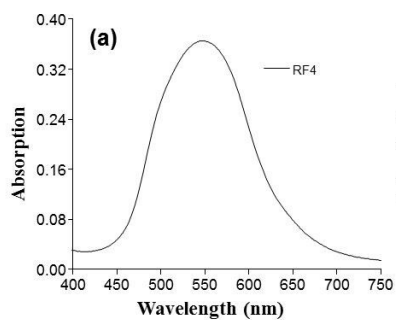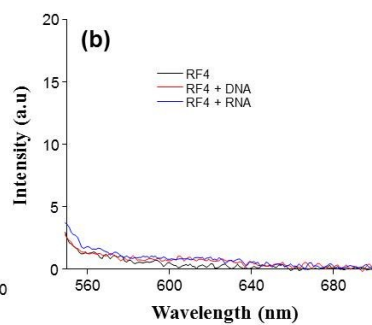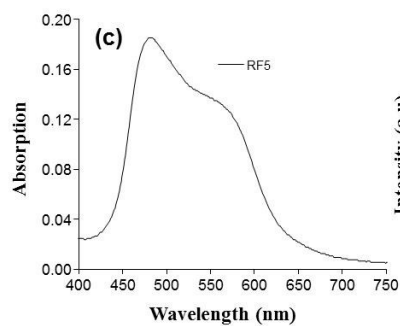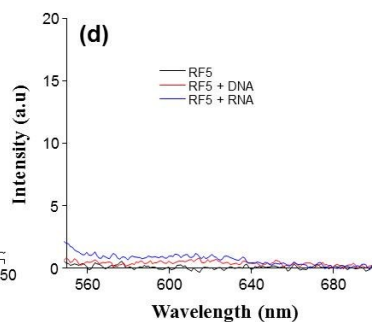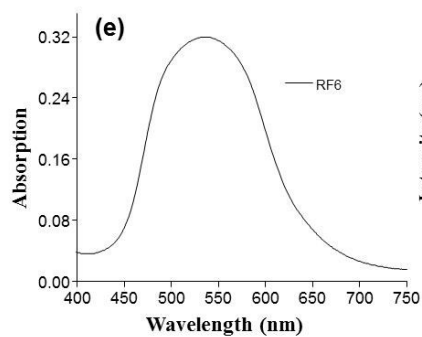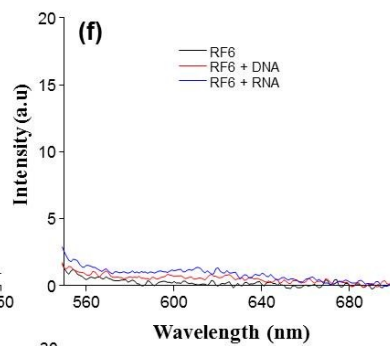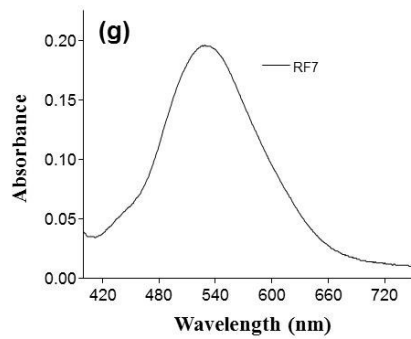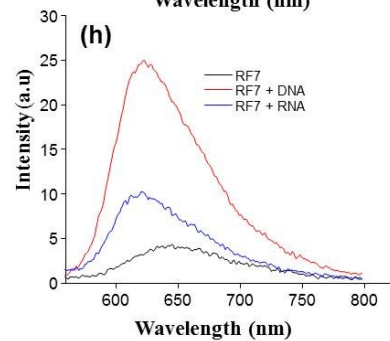

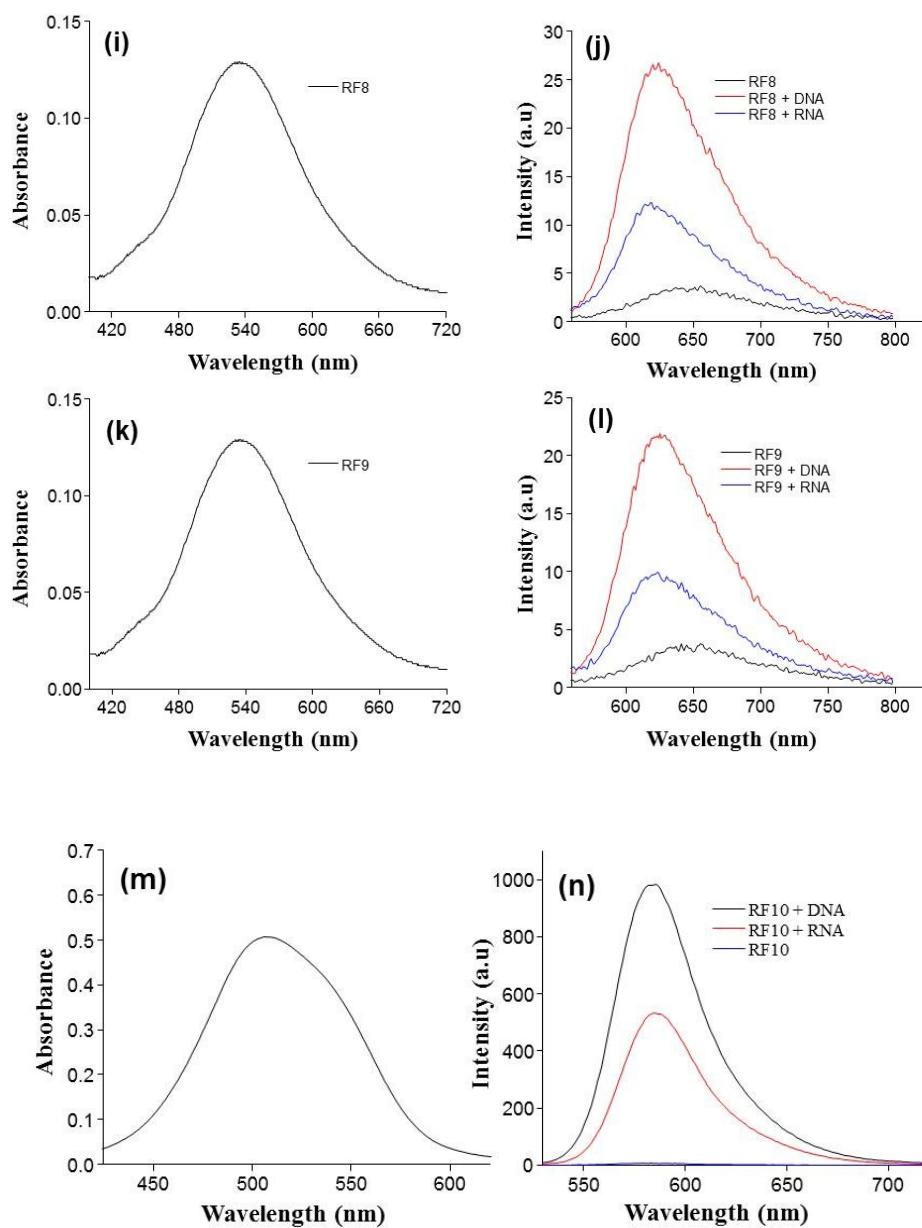

**Fig. S2: The optical responses of the probes (RF4-RF10).** a, c, e, g, i, k, m) Absorption maxima and b, d, f, h, j, l, n) emission spectra of **RF4-RF10** respectively. The optical behaviour was studied under physiological conditions (PBS, 0.1 M, pH = 7.34) using 10  $\mu$ M as the probes concentration and 1 mg/mL DNA/RNA.

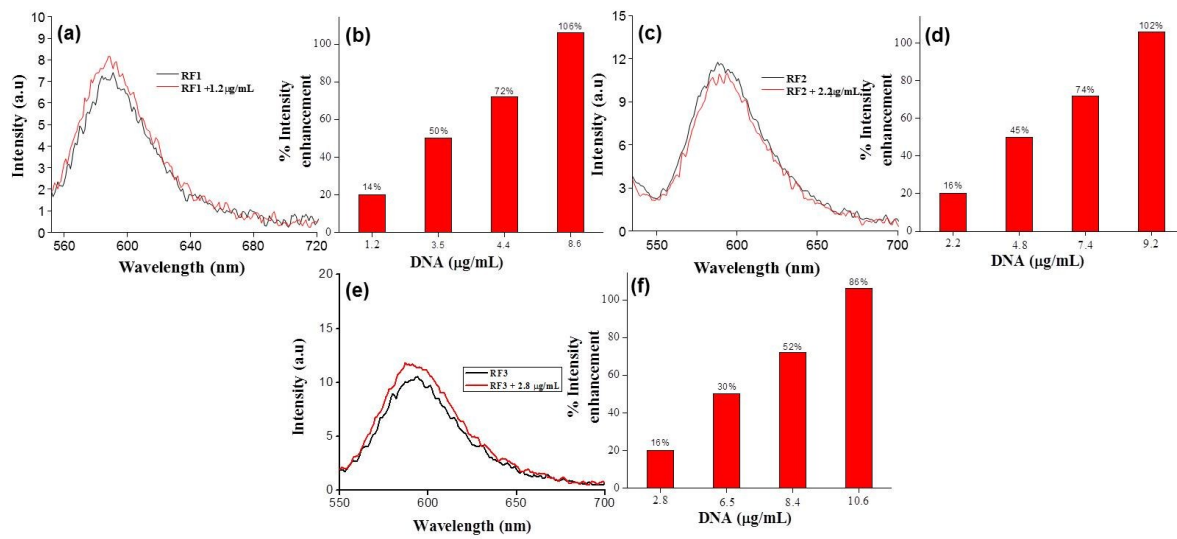

**Fig. S3:** Calculation of experimental limit of detection of **RF1-RF3**.



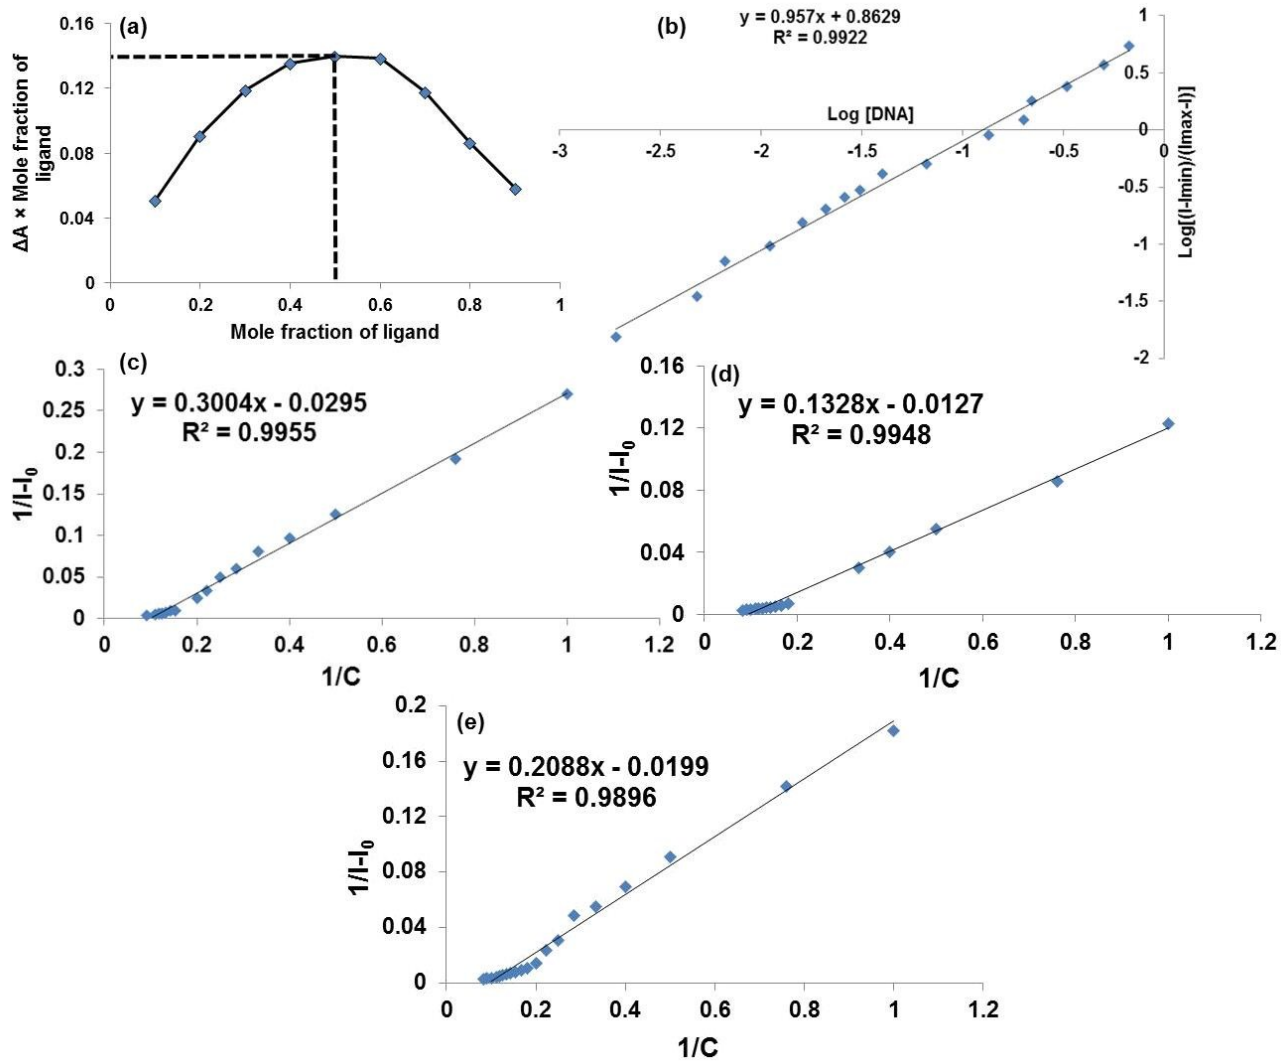

**Fig. S4:** a) Jobs plot; b) Hill plot ( $m = 1$ ) showing Binding stoichiometry (1:1); c, d, e) Calculation of binding constant of **RF1-RF3**.

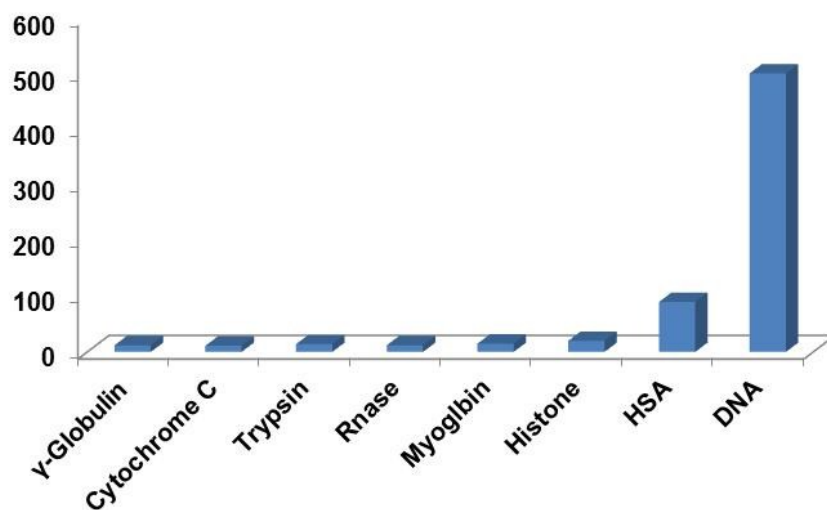

**Fig. S5:** Measurement of selectivity of **RF1** towards DNA as compared to other competitive biomolecules.

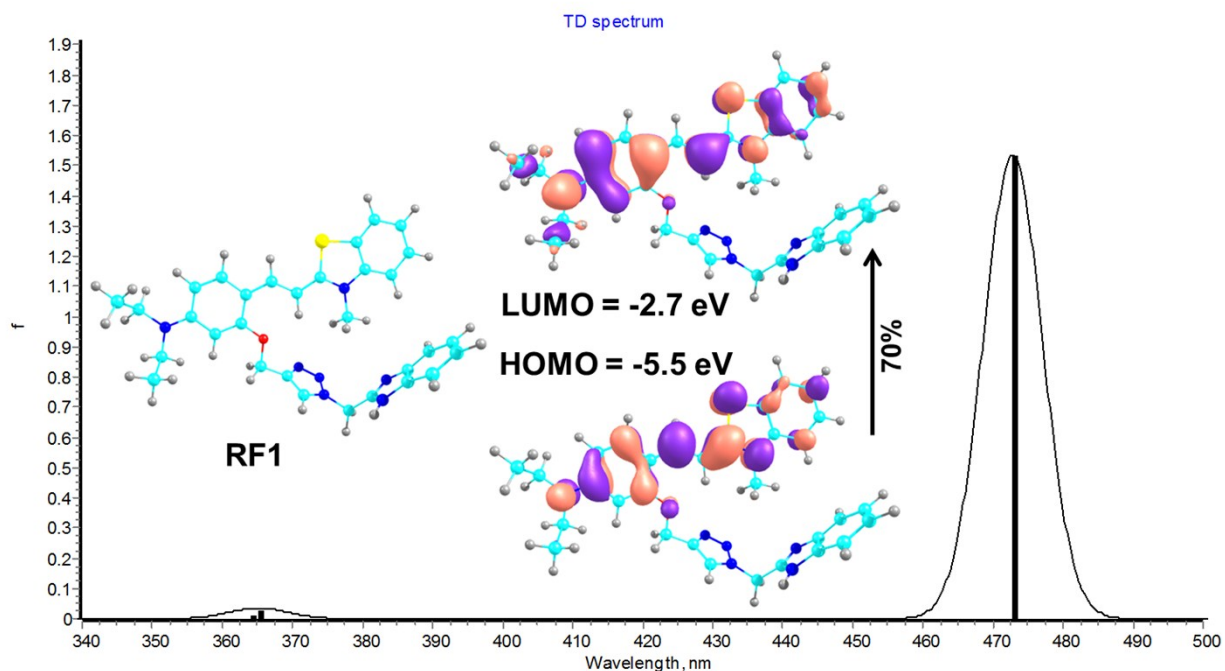

**Fig. S6:** Showing the outcomes molecular simulation including optimized geometry, corresponding HOMOs-LUMOs and UV-spectra of **RF1**.

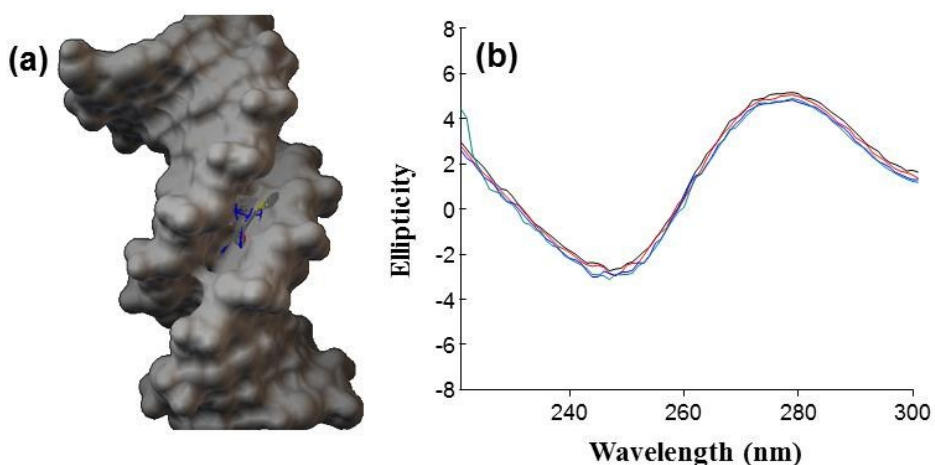

**Fig. S7:** a, b) Theoretically optimized geometry of **RF1**-DNA complex and CD-spectra of **RF1** (0-10  $\mu\text{M}$ ) in the presence of DNA (1 mg/mL).

| Probe     | Ex/Em (nm) | Extinction coefficient ( $\epsilon$ ) $\text{M}^{-1}\text{cm}^{-1}$ | Quantum yield ( $\phi$ ) | Brightness $B = (\phi \times \epsilon)$ | Stokes shift (nm) | Detection Limit ( $\mu\text{g}/\text{mL}$ ) | Binding constant ( $\text{M}^{-1}$ ) |
|-----------|------------|---------------------------------------------------------------------|--------------------------|-----------------------------------------|-------------------|---------------------------------------------|--------------------------------------|
| RF1 + DNA | 490/585    | 52600                                                               | 0.5                      | 26300                                   | 95                | 1.2                                         | $9.8 \times 10^4$                    |
| RF2 + DNA | 520/588    | 54600                                                               | 0.7                      | 40400                                   | 68                | 2.2                                         | $9.5 \times 10^4$                    |
| RF3 + DNA | 520/587    | 45600                                                               | 0.5                      | 26904                                   | 67                | 2.8                                         | $9.5 \times 10^4$                    |

**Table S1:** Photophysical parameters of the probes **RF1-RF3** in the presence of DNA.

|                         | RF1 + DNA | RF4 + DNA | RF7 + DNA | RF1 + Glycerol |
|-------------------------|-----------|-----------|-----------|----------------|
| $\tau_{\text{av}}$ (ns) | 2.6       | 0.17      | 0.47      | 0.9            |
| $\chi^2$                | 1.17      | 1.19      | 1.18      | 1.15           |

**Table S2:** Lifetime measurement of the probes **RF1**, **RF4** and **RF7** (10  $\mu\text{M}$ ) in the presence of DNA (1 mg/mL) and **RF1** in glycerol using 560 nm LED.

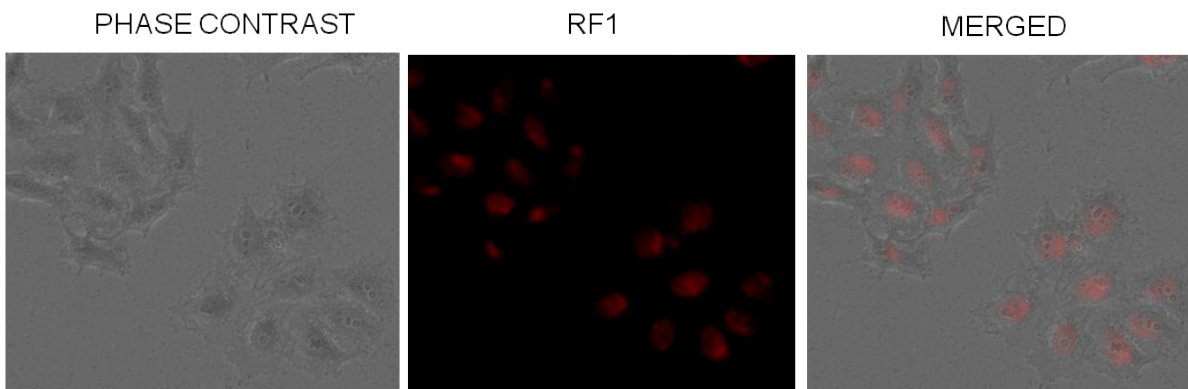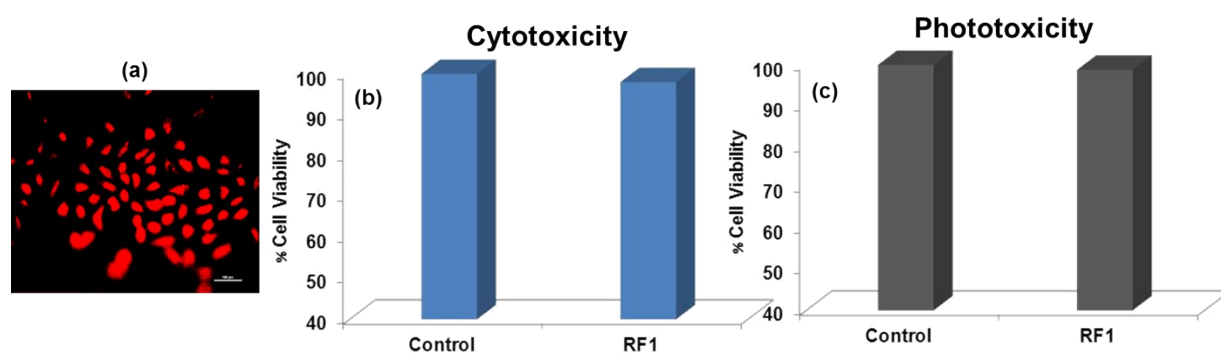

**Fig. S8:** a) Live HeLa cells stained with **RF1** at 10 $\mu$ M concentration; b, c) showing the quantification of cytotoxicity and phototoxicity of **RF1** (10  $\mu$ M) in HeLa cells respectively.

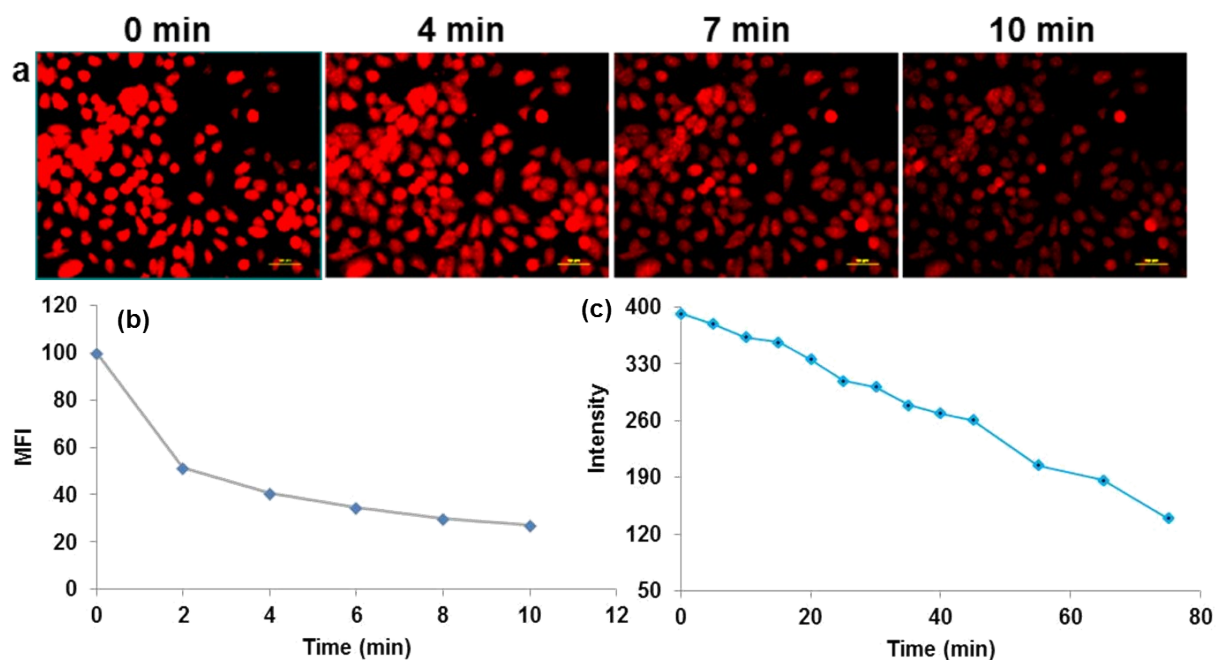

**Fig. S9: Quantification of Photostability in cell and solution:** a) and b) showing the decrease in the fluorescence intensity of **RF1** in cellular medium with respect to time upon continuous exposure of PI channel, c) showing the decrease in the fluorescence intensity of **RF1** in solution under mercury vapour lamp (160 W,  $2.1 \times 10^3$  Lux). The measured half-life time ( $t_{1/2}$ ) was found  $>57$  min.

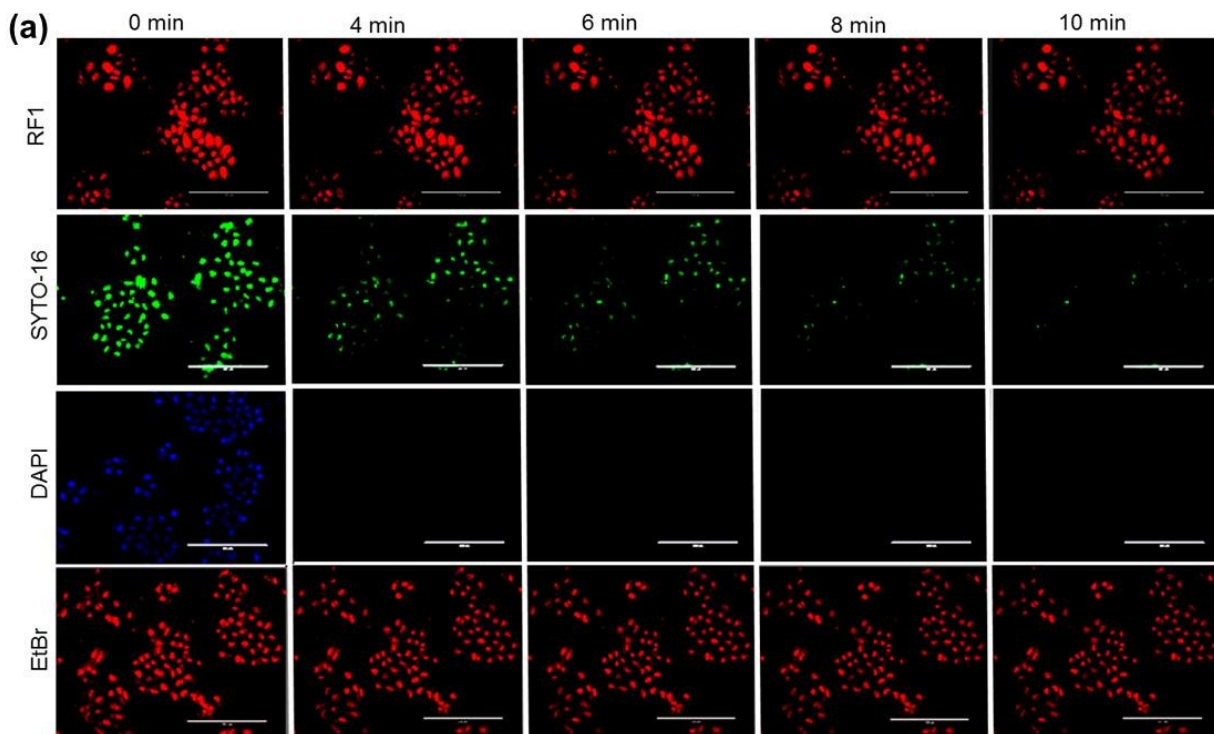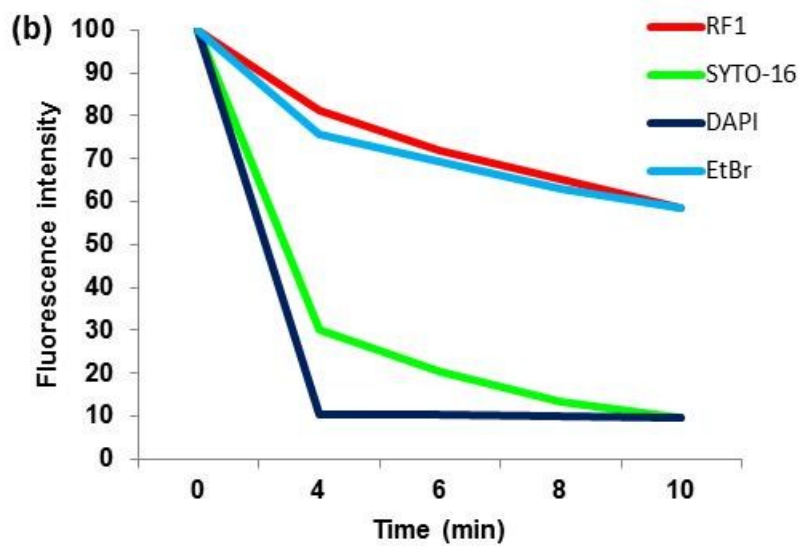

**Fig. S10:** a, b) Photostability comparison of **RF1** with Syto-16, DAPI and Ethidium bromide in cellular system for 10 min under continuous exposure of a set of LEDs at their own excitation wavelength. Scale bar-200 $\mu$ m.

### Synthesis and Characterization:

**Azoles (HA1-HA3) and azides (AZ1-AZ3):** The azoles were synthesized by following the reported methods <sup>14</sup> and their corresponding azides were synthesized by stirring the mixture of azoles and azide in DMSO at room temperature for overnight.

- 1) **Derivatives of Thiazole (P1-P3):** 2-methyl benzothiazole as a greenish liquid was synthesized by following the reported method.<sup>15</sup> Then, nitro derivative of 2-methyl benzothiazole was obtained as a light brown solid and further the nitro was reduced to amine to accomplish the synthesis of amino derivative of the thiazole (1eq of 2-methyl-5-nitro benzothiazole, 10 eq of iron and 4 eq of hydrochloric acid were heated to reflux in ethanol-water mixture, 3:2 for 24 h).<sup>16</sup> Next, the alkyl derivative (**P3**) of 5-amino-2-methyl benzothiazole was synthesized as yellowish liquid by stirring the mixture of amine (1 eq), ethyl bromide (2.5 eq) and potassium carbonate (3 eq) in dimethyl formamide (DMF, 2 mL/mmol) at room temperature for 24 h and followed by extraction using dichloromethane-ice cold water mixture.<sup>17</sup>
- 2) **Iodide salts of thiazole (S1-S3):** The iodide salts of **P3** was obtained by stirring the mixture of **P3** (1eq) and methyl iodide (1.5 eq) in dichloromethane at room temperature for 12 h and followed by the washing of green precipitates by diethyl ether 2-3 times. Whereas the thiazolium salts **S1/S2** were obtained by refluxing **P1/P2** (1 eq) and methyl iodide (1.5 eq) in acetonitrile (3 mL/mmol) for 12 h in the form of white and green solid respectively by washing with ethyl acetate 2-3 times.<sup>18</sup>
- 3) **Compounds B1 & B2:** 2-hydroxy-4-diethylamino benzaldehyde (1 eq), alkyl bromide (1.2 eq) and potassium carbonate (2 eq) were mixed in dimethyl formamide (DMF, 1.5 mL/mmol) and stirred at room temperature for 12 h. The progress of the reaction was monitored using thin layer chromatography. The mixture was poured on ice cubes and the brown colored precipitates were filtered and washed with cold water. The product was dried and washed with diethyl ether to get pure product.
- 4) **Triazoles (T1-T3):** The triazoles **T1-T3** were synthesized from the **B1** (1eq) and the corresponding azides (1.2 eq) by adding freshly prepared solution of CuSO<sub>4</sub>.5H<sub>2</sub>O (10 mol %) and sodium ascorbate (30 mol %) in a mixture of t-butanol/water/THF (3 mL/mmol, 1:1:1). The resulting mixture was stirred at room temperature for overnight.

The progress of the reaction was monitored by thin layer chromatography. On completion, the products were extracted with dichloromethane (DCM) with 2-3 times and washed with diethyl ether. Further, the recrystallization using ethanol gave the pure products.

- 5) **Probes (RF1-RF10):** The probes were synthesized from their corresponding precursors by Knoevenagel condensation by refluxing the aldehydes (1eq) and the thiazolium salts (0.91 eq) in ethanol (3 mL/mmol). The colored precipitates were filtered and washed with ethyl acetate for 3-4 times to get the pure products.<sup>19</sup>

**P3:** Rf = 71%, Brown liquid, Yield: 40%, FT-IR ( $\nu$  in  $\text{cm}^{-1}$ ): 2980, 1585, 1530, 1475.  $^1\text{H}$  NMR (500 MHz,  $\text{CDCl}_3$ ):  $\delta$  = 7.65 (d,  $J$  = 8.95 Hz, 1H), 6.91 (s, 1H), 6.76-6.74 (m, 1H), 3.31-3.27 (q,  $J$  = 6.9 Hz, 4H), 2.64 (s, 3H), 1.08 (t,  $J$  = 5 Hz, 6H) ppm.  $^{13}\text{C}$  NMR (125 MHz,  $\text{CDCl}_3$ ): 161.2, 145.7, 144.5, 137.8, 122.3, 102.4, 44.8, 19.7, 12.4 ppm. HRMS:  $m/z$  calculated for  $\text{C}_{12}\text{H}_{16}\text{N}_2\text{S}$  [ $\text{M} + \text{H}$ ] 221.1112, found 221.1106.

**S2:** Rf = 52%, Greenish solid, Yield: 75%, M.P. - 220°C, FT-IR ( $\nu$  in  $\text{cm}^{-1}$ ): 2975, 1597, 1537, 1493, 1357, 1286.  $^1\text{H}$  NMR (500 MHz,  $\text{DMSO-d}_6$ ):  $\delta$  = 9.45 (s, 1H), 8.68-8.65 (s, 1H), 8.53-8.51 (s, 1H), 4.2 (s, 3H), 3.2 (s, 3H) ppm.  $^{13}\text{C}$  NMR (125 MHz,  $\text{DMSO-d}_6$ ): 183, 146, 145, 129.6, 124.16, 121, 118, 36.9, 18 ppm. HRMS:  $m/z$  calculated for  $\text{C}_9\text{H}_9\text{N}_2\text{O}_2\text{S}$  [ $\text{M} - \text{I}$ ] 209.0385, found 209.0379.

**S3:** Rf = 52%, Greenish solid, Yield: 78%, M.P. - 106.0°C FT-IR ( $\nu$  in  $\text{cm}^{-1}$ ): 2975, 1597, 1537, 1493, 1357, 1286.  $^1\text{H}$  NMR (500 MHz,  $\text{DMSO-d}_6$ ):  $\delta$  = 7.96 (d,  $J$  = 9.65 Hz, 1H), 7.52 (s, 1H), 7.19-7.16 (m, 1H), 4.9 (s, 3H), 3.46-3.42 (q,  $J$  = 7.6 Hz, 4H), 3.0 (s, 3H), 1.13 (t,  $J$  = 6.85 Hz, 6H) ppm.  $^{13}\text{C}$  NMR (125 MHz,  $\text{DMSO-d}_6$ ): 169.4, 147.3, 131.8, 131.1, 117.1, 114.2, 103, 79, 44.2, 35.5, 16.4, 12.2 ppm. HRMS:  $m/z$  calculated for  $\text{C}_{13}\text{H}_{19}\text{N}_2\text{S}$  [ $\text{M} - \text{I}$ ] 235.1269, found 235.1263.

**T1:** Rf = 57%, Yellow solid, Yield: 58%, M.P. - 173°C, FT-IR ( $\nu$  in  $\text{cm}^{-1}$ ): 2976, 1648, 1584, 1520, 1394, 1265, 1109.  $^1\text{H}$  NMR (500 MHz,  $\text{CDCl}_3$ ):  $\delta$  = 9.93 (s, 1H), 7.9 (s, 1H), 7.62-7.53 (m, 3H), 7.20-7.19 (m, 2H), 6.24-6.22 (m, 1H), 5.85 (s, 2H), 5.1 (s, 2H), 3.36-3.32 (m, 4H), 1.14 (t,  $J$  = 6.9 Hz, 6H) ppm.  $^{13}\text{C}$  NMR (125 MHz,  $\text{CDCl}_3$ ): 187.2, 162.6, 153.9, 144, 131.2, 124.1,



113.9, 104.8, 93.9, 62, 44.7, 12.44 ppm. HRMS:  $m/z$  calculated for  $C_{22}H_{24}N_6O_2$  [M + H] 405.2039, found 405.2031.

**T2:** Rf = 61%, Brown solid, Yield: 72%, M.P. - 154°C, FT-IR ( $\nu$  in  $cm^{-1}$ ): 2972, 1640, 1582, 1518, 1392, 1262, 1115.  $^1H$  NMR (500 MHz,  $CDCl_3$ ):  $\delta$  = 10 (s, 1H), 7.9 (s, 1H), 7.75-7.73 (m, 1H), 7.69-7.68 (m, 1H), 7.54-7.53 (m, 1H), 7.40-7.37 (m, 3H), 6.30-6.28 (m, 1H), 6.25-6.24 (m, 1H), 5.87 (s, 2H), 5.35 (s, 2H), 3.43-3.39 (m, 4H), 1.19 (t, J = 7.6 Hz, 6H) ppm.  $^{13}C$  NMR (125 MHz,  $CDCl_3$ ): 186.8, 162.5, 158.3, 153.8, 150.9, 144.9, 131.0, 126.2, 125, 123.6, 114.1, 111, 104.7, 93.9, 62.3, 47.2, 44.8, 12.5 ppm. HRMS:  $m/z$  calculated for  $C_{22}H_{23}N_5O_3$  [M + H] 406.1879, found 406.1873.

**T3:** Rf = 62%, Yellow solid, Yield: 72%, M.P. - 126.5°C, FT-IR ( $\nu$  in  $cm^{-1}$ ): 2971, 1642, 1590, 1510, 1385, 1261, 1102.  $^1H$  NMR (500 MHz,  $CDCl_3$ ):  $\delta$  = 10 (s, 1H), 8.05-8.03 (m, 1H), 7.93 (s, 1H), 7.87-7.85 (m, 1H), 7.68-7.66 (m, 1H), 7.53-7.50 (m, 1H), 7.44-7.41 (m, 1H), 6.29-6.27 (m, 1H), 6.23 (s, 1H), 5.98 (s, 2H), 5.33 (s, 2H), 3.42-3.38 (m, 4H), 1.18 (t, J = 6.85 Hz, 6H) ppm.  $^{13}C$  NMR (125 MHz,  $CDCl_3$ ): 186.8, 162.5, 158.3, 153.8, 150.9, 144.9, 131.0, 126.2, 125, 123.6, 114.1, 111, 104.7, 93.9, 62.3, 47.2, 44.8, 12.5 ppm. HRMS:  $m/z$  calculated for  $C_{22}H_{23}N_5O_2S$  [M + H] 422.1651, found 422.1645.

**RF1:** Rf = 51%, Dark red solid, Yield: 52%, M.P. - 227.5°C, FT-IR ( $\nu$  in  $cm^{-1}$ ): 3078, 1613, 1567, 1516, 1399, 1343, 1263, 1199.  $^1H$  NMR (500 MHz,  $DMSO-d_6$ ):  $\delta$  = 8.47 (s, 1H), 8.16 (d, J = 8.25 Hz, 1H), 8.0-7.97 (m, 1H), 7.86-7.84 (m, 1H), 7.97-7.77 (m, 1H), 7.71-7.69 (m, 1H), 7.62-7.59 (m, 1H), 7.56-7.53 (m, 3H), 7.22-7.19 (m, 1H), 7.16-7.12 (m, 1H), 6.52-6.49 (m, 2H), 5.95 (s, 2H), 5.4 (s, 2H), 3.8 (s, 3H), 3.55-3.51 (m, 4H), 1.16 (t, J = 6.9 Hz, 6H) ppm.  $^{13}C$  NMR (125 MHz,  $DMSO-d_6$ ): 171.14, 161.2, 153.5, 148.35, 142.42, 141.8, 128.65, 127.1, 126.2, 125.51, 123.62, 122.76, 121.67, 118.88, 115.42, 111.68, 111.11, 106.13, 105.3, 94.8, 61.7, 47.4, 44.5, 34.8, 12.6 ppm. HRMS:  $m/z$  calculated for  $C_{32}H_{32}N_7OS$  [M - I] 550.2389, found 550.2350.

**RF2:** Rf = 52%, Violet solid, Yield: 52%, M.P. - 190.0°C, FT-IR ( $\nu$  in  $cm^{-1}$ ): 3075, 1615, 1562, 1512, 1405, 1350, 1275, 1210.  $^1H$  NMR (500 MHz,  $DMSO-d_6$ ):  $\delta$  = 8.56 (s, 1H), 8.17-8.16 (m, 1H), 8.02-7.99 (m, 1H), 7.96-7.94 (m, 1H), 7.81-7.80 (m, 1H), 7.74-7.70 (m, 3H), 7.63-7.54 (m, 2H), 7.43-7.36 (m, 2H), 6.54-6.51 (m, 2H), 6.18 (s, 2H), 5.47 (s, 2H), 3.98 (s, 3H), 3.56-3.52 (m,

4H), 1.17 (t, J = 6.8 Hz, 6H) ppm.  $^{13}\text{C}$  NMR (125 MHz, DMSO- $d_6$ ): 171.2, 161.1, 160.5, 153.6, 150.3, 142.6, 141.9, 140.1, 128.7, 127, 126.2, 125.9, 124.9, 119.9, 115.4, 111.1, 106.1, 105.3, 94.8, 61.6, 46.7, 44.5, 34.9, 12.6 ppm. HRMS:  $m/z$  calculated for  $\text{C}_{31}\text{H}_{31}\text{N}_6\text{O}_2\text{S}$  [M - I] 551.2229, found 551.2258.

**RF3:** Rf = 54%, Violet solid, Yield: 52%, M.P. - 145.0 $^\circ\text{C}$ , FT-IR ( $\nu$  in  $\text{cm}^{-1}$ ): 3070, 1620, 1557, 1525, 1415, 1360, 1245.  $^1\text{H}$  NMR (500 MHz, DMSO- $d_6$ ):  $\delta$  = 8.58 (s, 1H), 8.13-8.08 (m, 2H), 7.97-7.91 (m, 2H), 7.87-7.85 (m, 1H), 7.76-7.74 (m, 1H), 7.68-7.55 (m, 1H), 7.51-7.43 (m, 1H), 6.46-6.42 (m, 2H), 6.28 (s, 2H), 5.44 (s, 2H), 3.91 (s, 3H), 3.51-3.47 (m, 4H), 1.16 (t, J = 6.85 Hz, 6H) ppm.  $^{13}\text{C}$  NMR (125 MHz, DMSO- $d_6$ ): 170.9, 165.2, 160.9, 153.5, 152.2, 142.7, 141.8, 134.9, 128.6, 126.9, 126.6, 126.2, 125.7, 123.5, 122.8, 115.3, 111.2, 106.1, 105.2, 94.8, 61.8, 50.8, 44.5, 34.9, 12.6 ppm. HRMS:  $m/z$  calculated for  $\text{C}_{31}\text{H}_{31}\text{N}_6\text{OS}_2$  [M - I] 567.2001, found 567.2001.

**RF4:** Rf = 48%, Violet solid, Yield: 55%, M.P. - 223.0 $^\circ\text{C}$ , FT-IR ( $\nu$  in  $\text{cm}^{-1}$ ): 3064, 1616, 1564, 1475, 1453, 1255, 1186.  $^1\text{H}$  NMR (500 MHz, DMSO- $d_6$ ):  $\delta$  = 12.76 (s, 1H), 9.0 (s, 1H), 8.52 (s, 1H), 8.40-8.38 (m, 1H), 7.95-7.89 (m, 2H), 7.37-7.36 (s, 1H), 7.54 (s, 2H), 7.39-7.37 (m, 1H), 7.19-7.16 (m, 3H), 6.5-6.4 (m, 2H), 5.99 (s, 2H), 5.43 (s, 2H), 3.83 (s, 3H), 3.54-3.52 (m, 4H), 1.17 (t, J = 6.9 Hz, 6H) ppm.  $^{13}\text{C}$  NMR (125 MHz, DMSO- $d_6$ ): 173.2, 161.8, 154.6, 145.8, 144.6, 142.2, 127.1, 125.6, 123.9, 122.7, 121.6, 119.8, 118.8, 115.2, 112.1, 111.7, 106.9, 94.6, 61.7, 47.5, 44.8, 35, 12.6 ppm. HRMS:  $m/z$  calculated for  $\text{C}_{31}\text{H}_{31}\text{N}_8\text{O}_3\text{S}$  [M - I] 595.224, found 595.2243.

**RF5:** Rf = 51%, Violet solid, Yield: 54%, M.P. - 176.0 $^\circ\text{C}$ , FT-IR ( $\nu$  in  $\text{cm}^{-1}$ ): 3060, 1610, 1570, 1465, 1443, 1250, 1182.  $^1\text{H}$  NMR (500 MHz, DMSO- $d_6$ ):  $\delta$  = 9.0 (s, 1H), 8.6 (s, 1H), 8.43-8.40 (m, 1H), 8.01-7.97 (m, 2H), 7.75-7.72 (m, 3H), 7.45-7.38 (m, 3H), 6.53-6.43 (m, 2H), 6.21 (s, 2H), 5.48 (s, 2H), 3.93 (s, 3H), 3.57-3.53 (m, 4H), 1.18 (t, J = 6.9 Hz, 6H) ppm.  $^{13}\text{C}$  NMR (125 MHz, DMSO- $d_6$ ): 173.2, 160.5, 154.6, 152.8, 150.3, 145.9, 144.7, 142.4, 140.2, 127.1, 126.0, 125.9, 124.9, 123.9, 119.9, 115.4, 112.1, 110, 94.7, 61.8, 46.7, 44.7, 35.2, 12.7 ppm. HRMS:  $m/z$  calculated for  $\text{C}_{31}\text{H}_{30}\text{N}_7\text{O}_4\text{S}$  [M - I] 596.2080, found 596.2081.

**RF6:** Rf = 52%, Violet solid, Yield: 52%, M.P. - 190.0°C, FT-IR ( $\nu$  in  $\text{cm}^{-1}$ ): 3070, 1620, 1565, 1462, 1440, 1252, 1175.  $^1\text{H}$  NMR (500 MHz, DMSO- $d_6$ ):  $\delta$  = 9.0 (s, 1H), 8.6 (s, 1H), 8.41-8.39 (m, 1H), 8.11-8.09 (m, 1H), 7.97-7.94 (m, 3H), 7.52-7.50 (m, 1H), 7.49-7.40 (m, 2H), 6.52-6.41 (m, 2H), 6.29 (s, 2H), 5.46 (s, 2H), 3.89 (s, 3H), 3.56-3.52 (m, 4H), 1.17 (t,  $J$  = 6.9 Hz, 6H) ppm.  $^{13}\text{C}$  NMR (125 MHz, DMSO- $d_6$ ): 173.1, 165.2, 154.6, 152.2, 145.9, 144.7, 142.4, 134.8, 127.1, 126.6, 125.8, 123.8, 122.8, 119.7, 115.4, 112.1, 94.7, 61.8, 50.83, 44.8, 35.2, 12.7 ppm. HRMS:  $m/z$  calculated for  $\text{C}_{31}\text{H}_{30}\text{N}_7\text{O}_3\text{S}_2$  [M - I] 612.1852, found 612.1855.

**RF7:** Rf = 54%, Violet solid, Yield: 35%, M.P. - 247.0°C, FT-IR ( $\nu$  in  $\text{cm}^{-1}$ ): 3069, 1615, 1565, 1512, 1392, 1334, 1258, 1188.  $^1\text{H}$  NMR (500 MHz, DMSO- $d_6$ ):  $\delta$  = 8.7 (s, 1H), 7.68-7.66 (m, 2H), 7.35-7.26 (m, 3H), 7.20-7.19 (m, 2H), 7.12-7.10 (m, 1H), 7.04-7.02 (m, 1H), 6.77-6.75 (m, 1H), 6.19 (s, 2H), 6.1 (s, 1H), 5.13 (s, 2H), 3.8 (s, 3H), 3.39-3.32 (m, 8H), 1.22-1.15 (m, 12H) ppm.  $^{13}\text{C}$  NMR (125 MHz, DMSO- $d_6$ ): 165.6, 163.7, 160.8, 152.7, 147.2, 143, 135.5, 131.6, 129.5, 125.1, 123.3, 121.8, 115, 113.1, 111.6, 105.8, 103.5, 94.5, 62.4, 51.8, 45, 36, 31.5, 29.5, 12.7, 12.4 ppm. HRMS:  $m/z$  calculated for  $\text{C}_{35}\text{H}_{41}\text{N}_8\text{OS}$  [M - I] 621.3124, found 621.3118.

**RF8:** Rf = 51%, Violet solid, Yield: 38%, M.P. - 255.0°C, FT-IR ( $\nu$  in  $\text{cm}^{-1}$ ): 3065, 1610, 1562, 1382, 1340, 1258, 1175.  $^1\text{H}$  NMR (500 MHz, DMSO- $d_6$ ):  $\delta$  = 8.5 (s, 1H), 7.79-7.7 (m, 5H), 7.52-7.48 (m, 1H), 7.42-7.35 (m, 4H), 7.07-7.04 (m, 1H), 6.47 (s, 2H), 5.75 (s, 2H), 5.43 (s, 2H), 3.92 (s, 3H), 3.52-3.48 (m, 4H), 3.45-3.40 (m, 4H), 1.17-1.10 (m, 12H) ppm.  $^{13}\text{C}$  NMR (125 MHz, DMSO- $d_6$ ): 165.4, 160.5, 152.5, 150.4, 147, 131.9, 129.2, 125.9, 124.9, 119.9, 116, 113.5, 111, 105.7, 103.1, 95, 61.6, 54.9, 46.6, 44.2, 35, 29, 12.7, 12.2 ppm. HRMS:  $m/z$  calculated for  $\text{C}_{35}\text{H}_{40}\text{N}_7\text{O}_2\text{S}$  [M - I] 622.2964, found 622.2958.

**RF9:** Rf = 49%, Violet solid, Yield: 38%, M.P. - 260.0°C, FT-IR ( $\nu$  in  $\text{cm}^{-1}$ ): 3061, 1618, 1557, 1375, 1345, 1262, 1171.  $^1\text{H}$  NMR (500 MHz, DMSO- $d_6$ ):  $\delta$  = 8.72 (s, 1H), 7.93-7.91 (m, 1H), 7.81-7.79 (m, 1H), 7.6-7.53 (m, 2H), 6.76-6.74 (m, 1H), 6.3 (s, 2H), 6.27-6.25 (m, 1H), 6.21-6.19 (m, 1H), 5.2 (s, 2H), 3.8 (s, 3H), 3.39-3.32 (m, 8H), 1.22-1.15 (m, 12H) ppm.  $^{13}\text{C}$  NMR (125 MHz, DMSO- $d_6$ ): 165.6, 163.5, 160.8, 152.7, 147.2, 143, 135.5, 131.6, 129.5, 126.2, 125.6, 125.1, 123.3, 121.8, 115, 113, 111.6, 105.8, 103.5, 94.5, 62.4, 51.8, 45, 36, 31.5, 29.5, 12.7, 12.4 ppm. HRMS:  $m/z$  calculated for  $\text{C}_{35}\text{H}_{40}\text{N}_7\text{OS}_2$  [M - I] 638.2736, found 638.2725.

**RF10:** Rf = 54%, Violet solid, Yield: 50%, M.P. - 202.0°C, FT-IR ( $\nu$  in  $\text{cm}^{-1}$ ): 3070, 1615, 1560, 1410, 1355, 1199.  $^1\text{H}$  NMR (500 MHz, DMSO- $d_6$ ):  $\delta$  = 8.44 (d, J = 8.25 Hz, 1H), 8.27 (d, J = 8.25 Hz, 1H), 8.20 (d, J = 8.25 Hz, 1H), 8.04-7.98 (m, 2H), 7.90-7.78 (m, 2H), 7.78-7.76 (m, 1H), 7.61-7.57 (m, 1H), 7.48-7.45 (m, 1H), 6.46-6.44 (m, 1H), 6.14-6.13 (m, 1H), 4.19-4.16 (m, 2H), 4.0 (s, 3H), 3.51-3.47 (q, J = 6.85 Hz, 3H), 1.47 (t, J = 6.85 Hz, 3H), 1.15 (t, J = 6.85 Hz, 6H) ppm.  $^{13}\text{C}$  NMR (125 MHz, DMSO- $d_6$ ): 173.2, 160.5, 154.6, 152.8, 150.3, 145.9, 144.7, 142.4, 140.2, 127.1, 126.0, 125.9, 124.9, 123.9, 119.9, 115.4, 112.1, 110, 94.7, 61.8, 46.7, 44.7, 35.2, 12.7 ppm. HRMS:  $m/z$  calculated for  $\text{C}_{22}\text{H}_{27}\text{N}_2\text{OS}$  [M - I] 367.1844, found 367.1840.

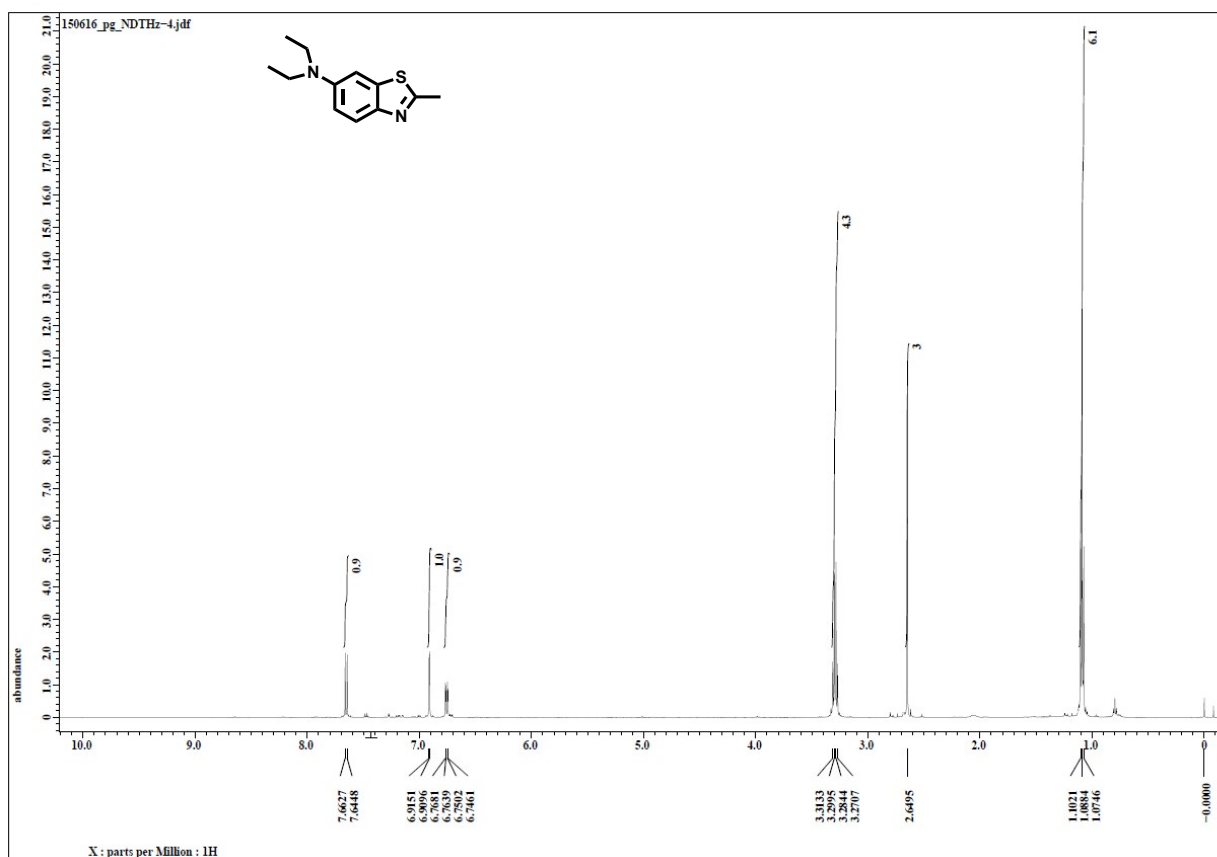

**Fig. S11:**  $^1\text{H}$ -NMR

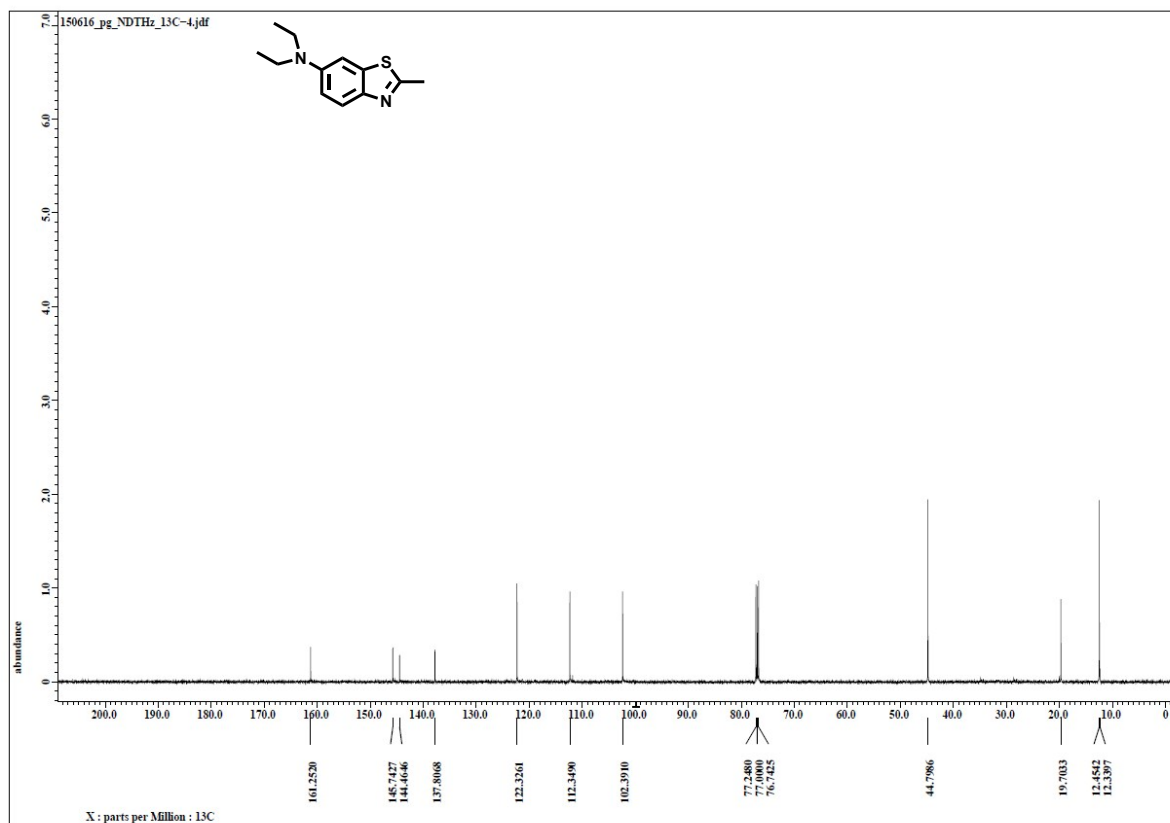

Fig. S12:  $^{13}\text{C}$ NMR

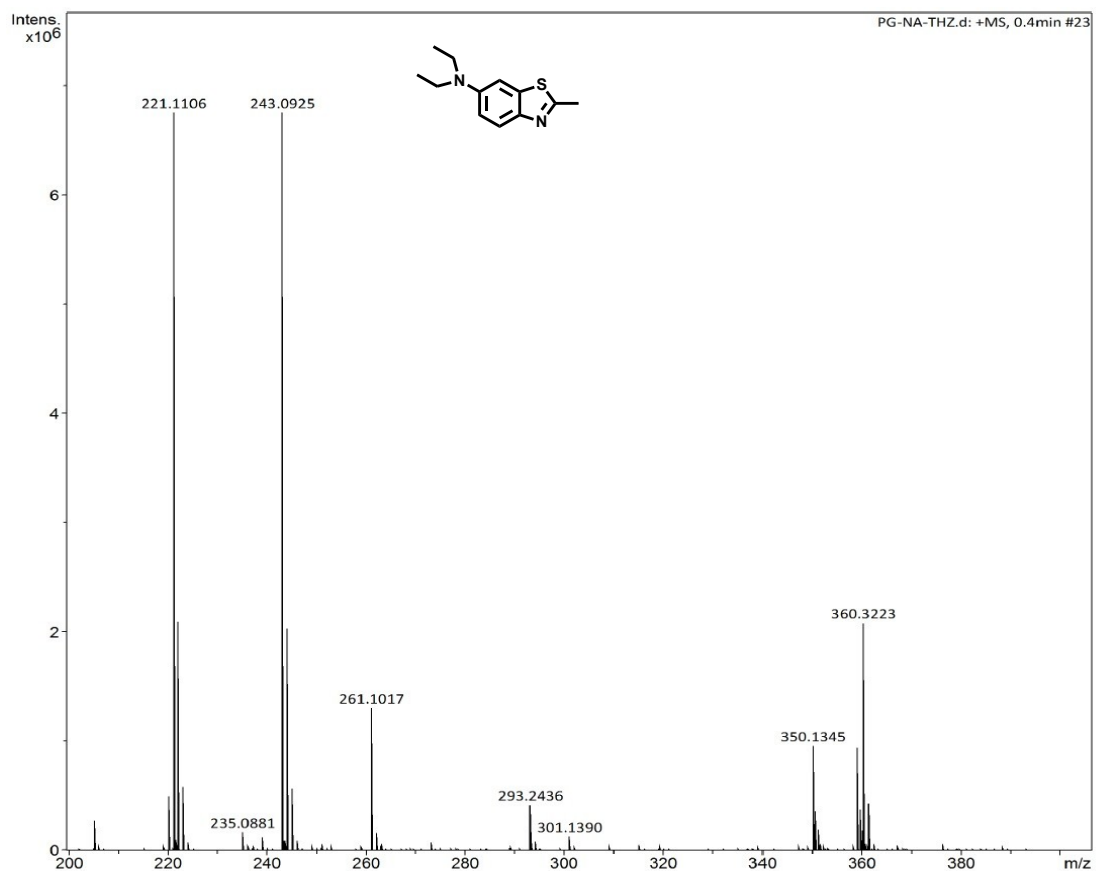

Fig. S13: HRMS

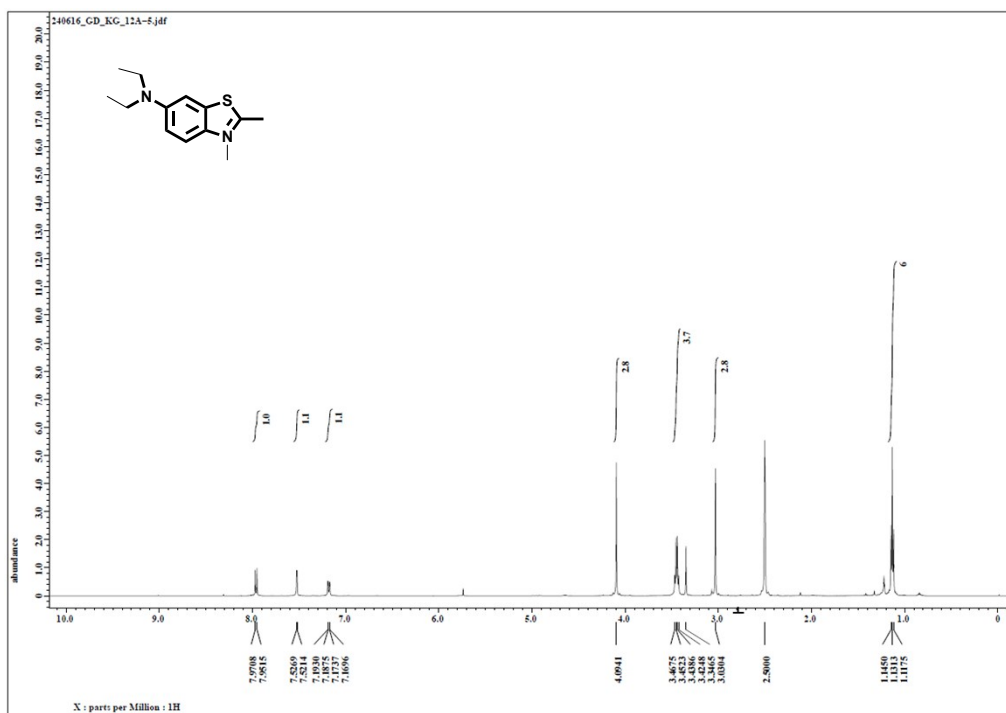

Fig. S14: <sup>1</sup>H-NMR

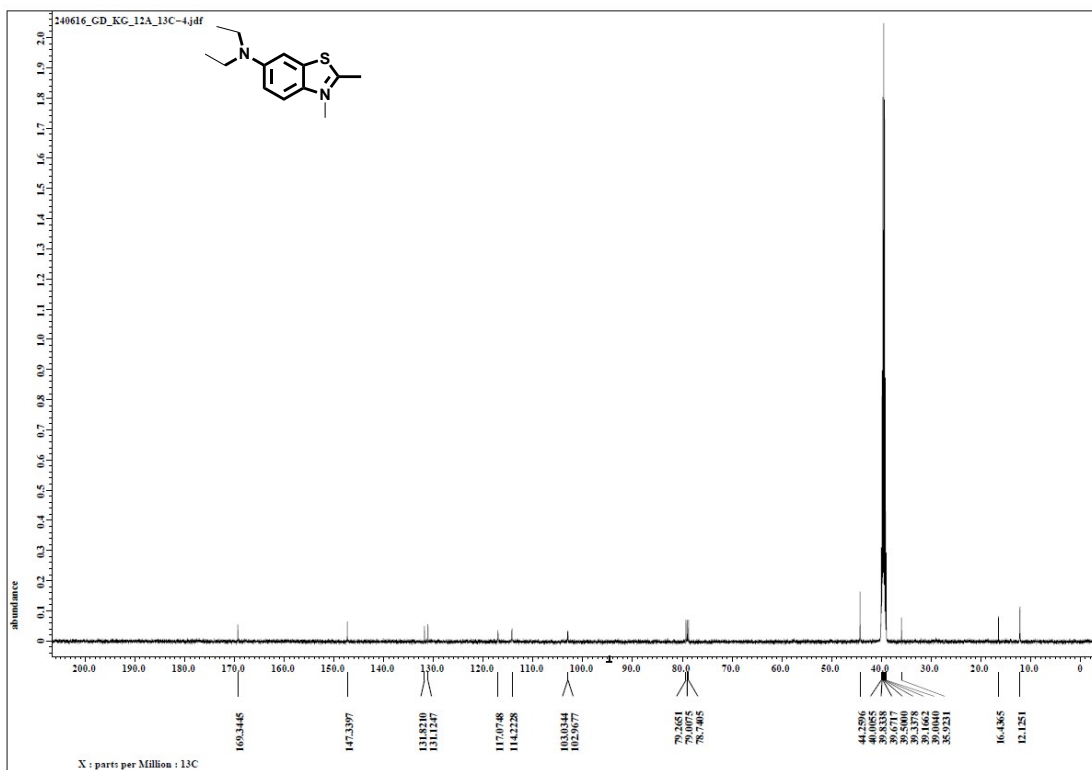

Fig. S15:  $^{13}\text{C}$ NMR

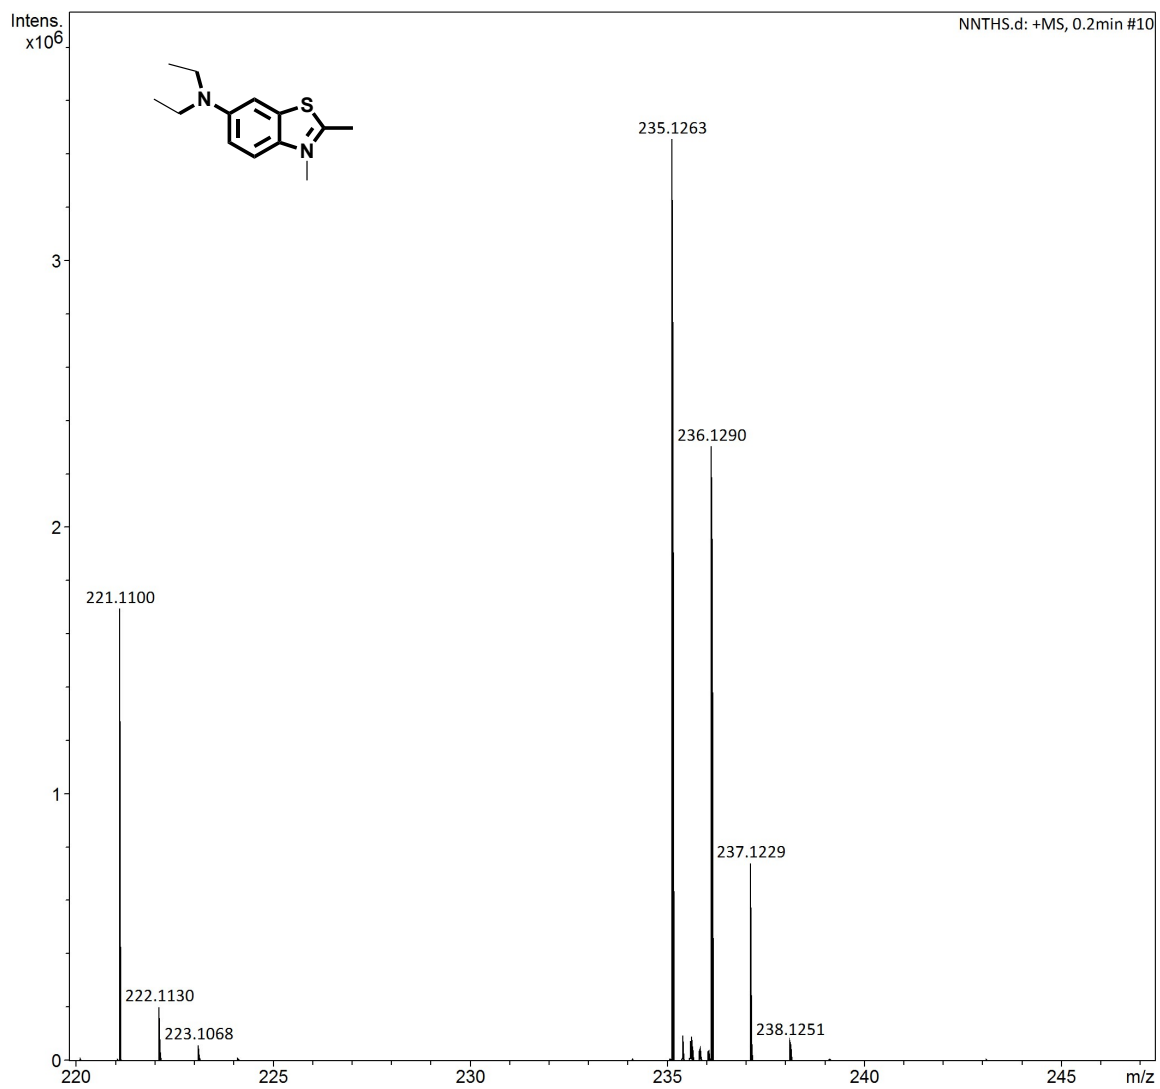

**Fig. S16: HRMS**



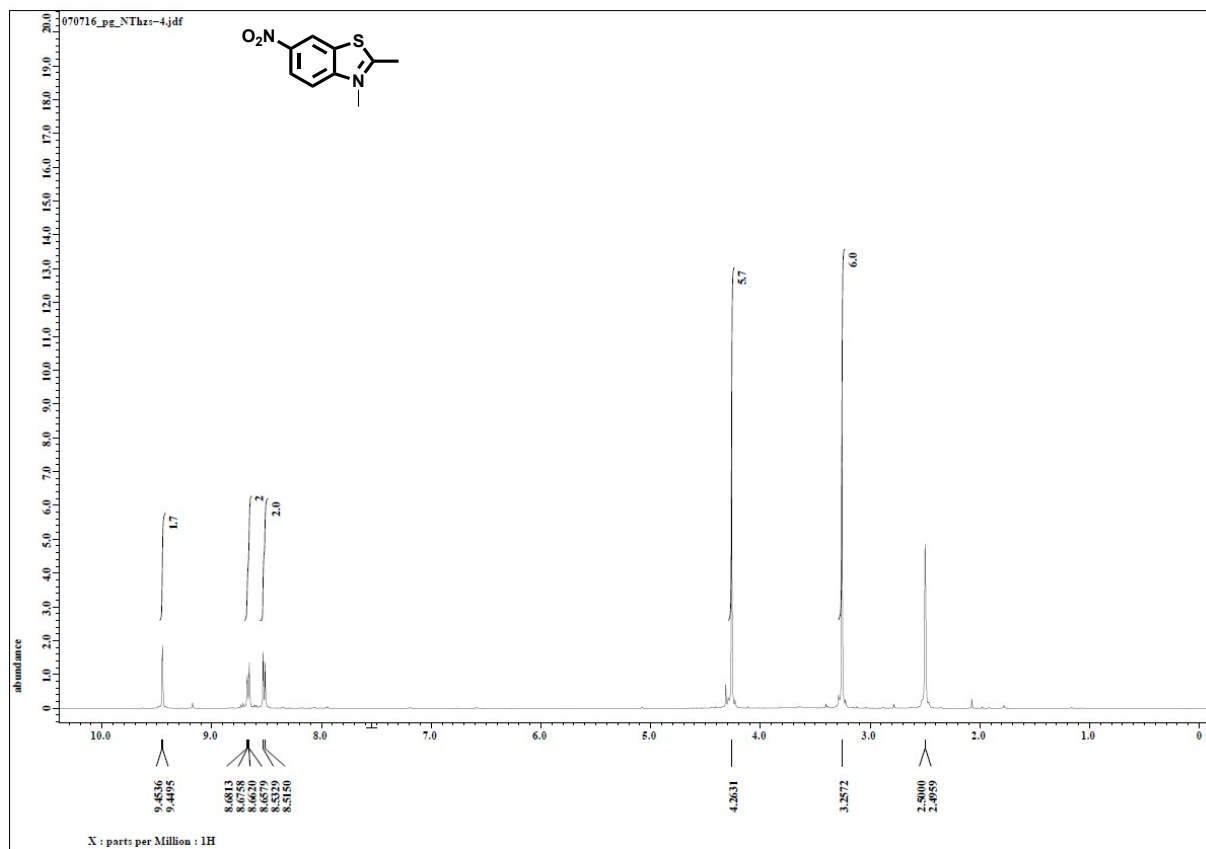

Fig. S17:  $^1\text{H-NMR}$

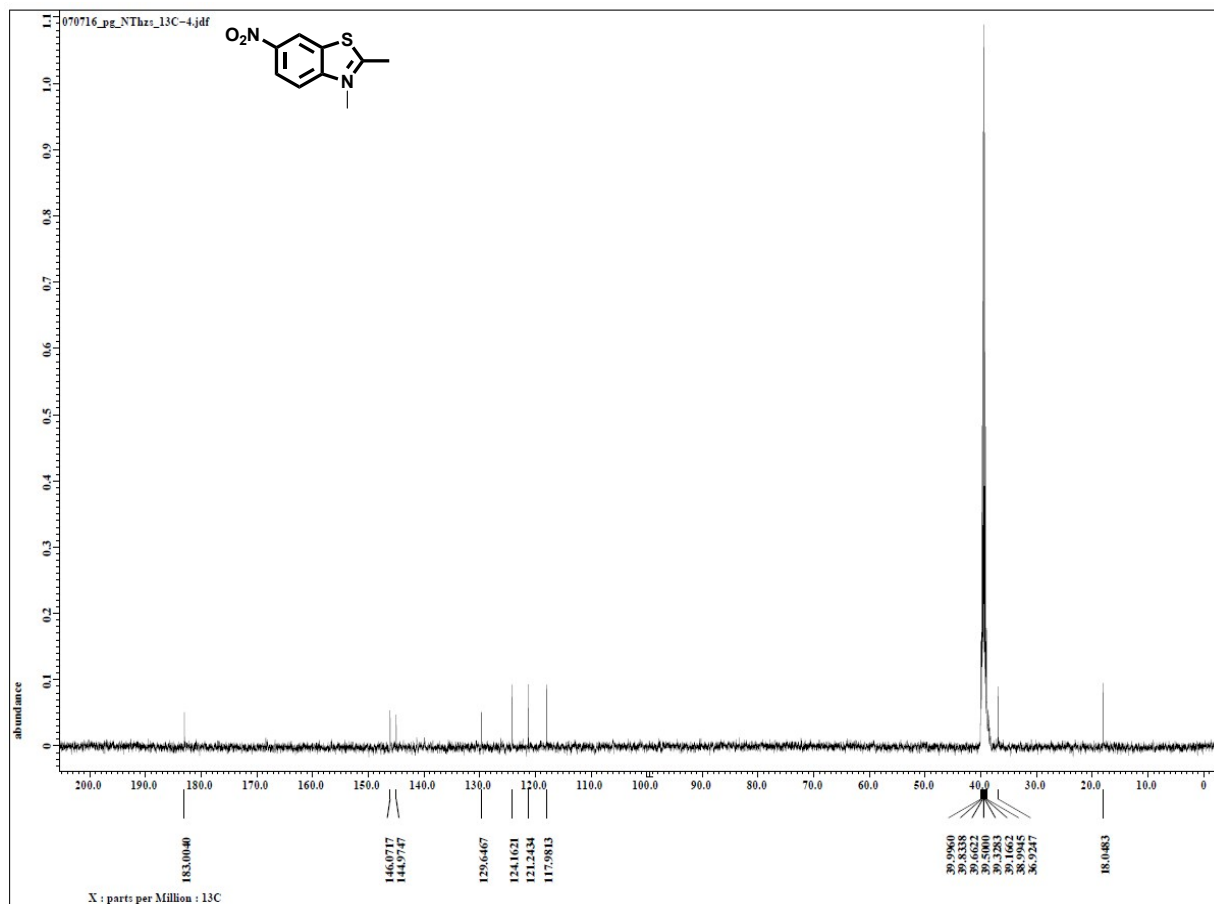

Fig. S18:  $^{13}\text{C}$ NMR

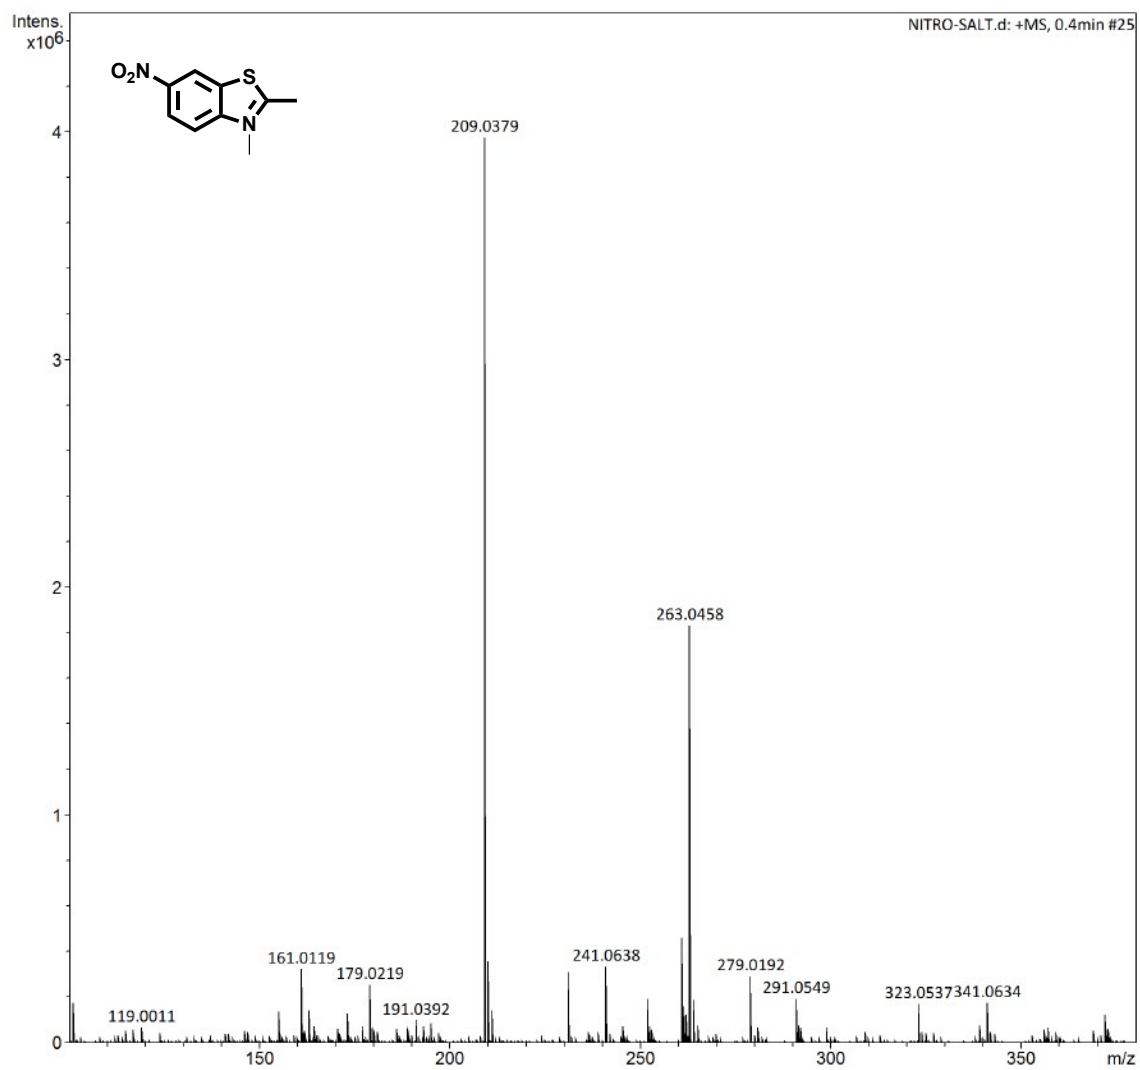

**Fig. S19: HRMS**

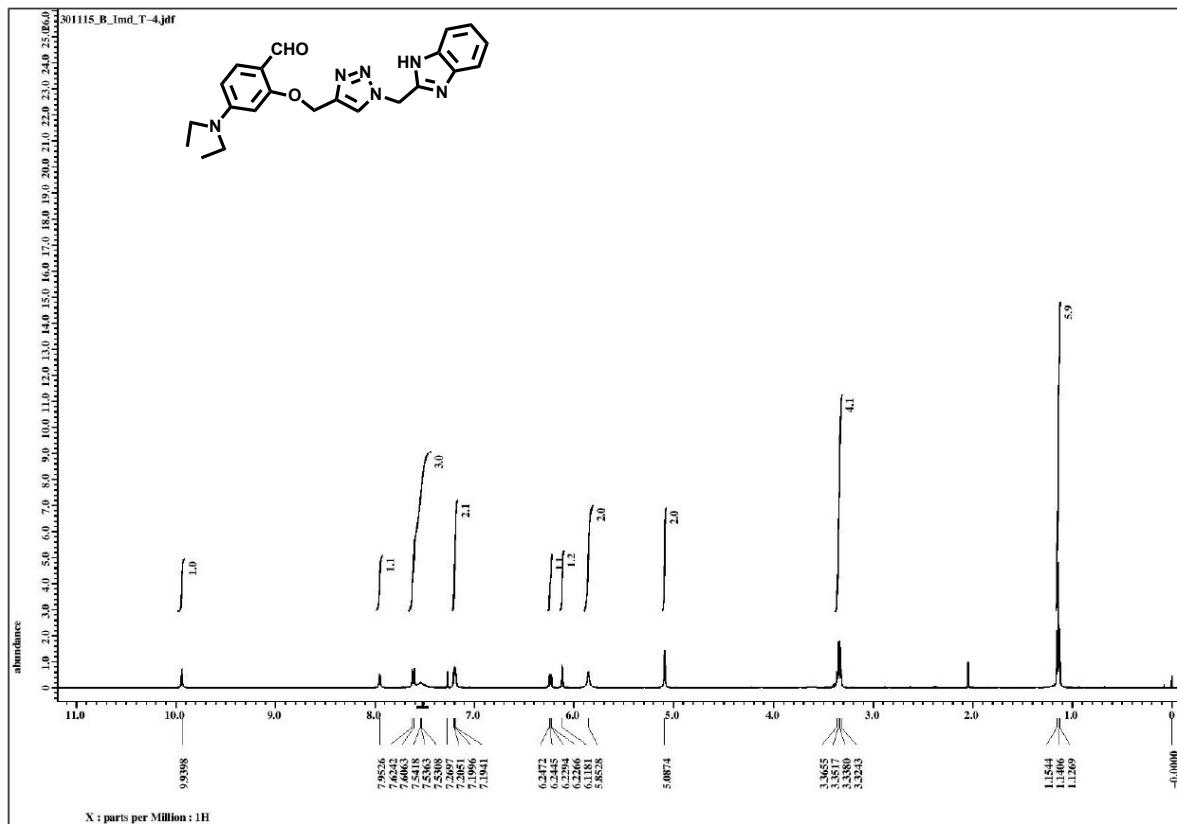

Fig. S20:  $^1\text{H-NMR}$

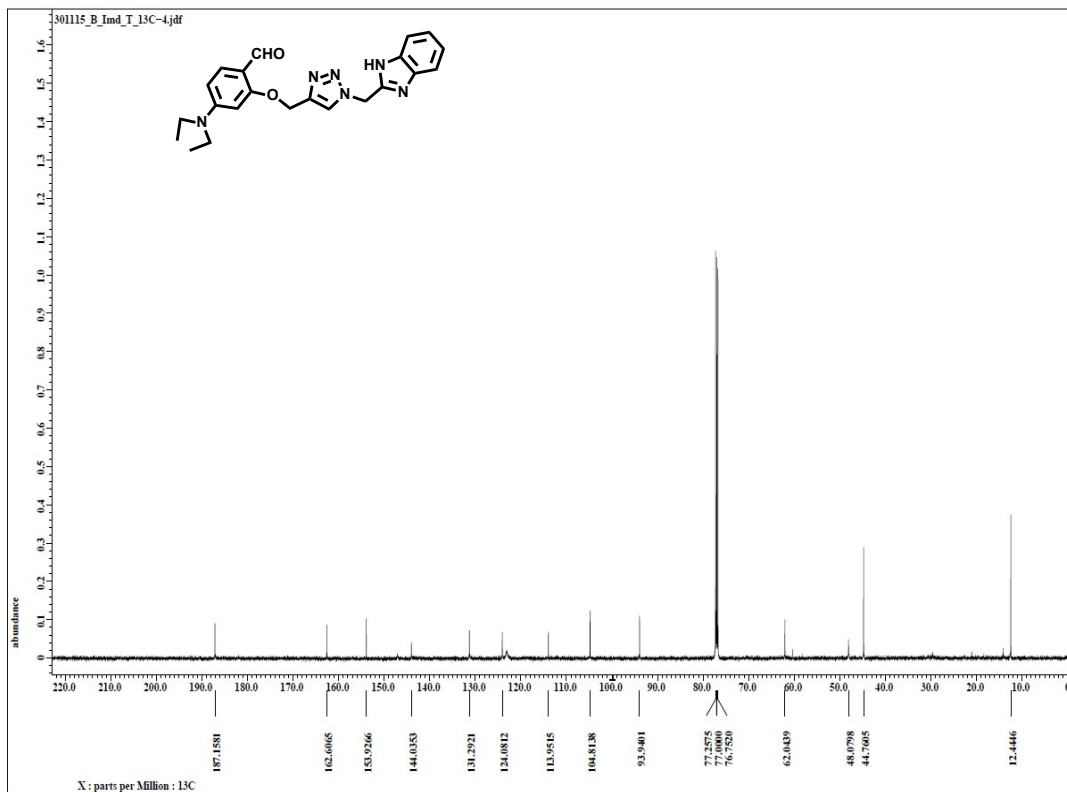

Fig. S21:  $^{13}\text{C}$ NMR

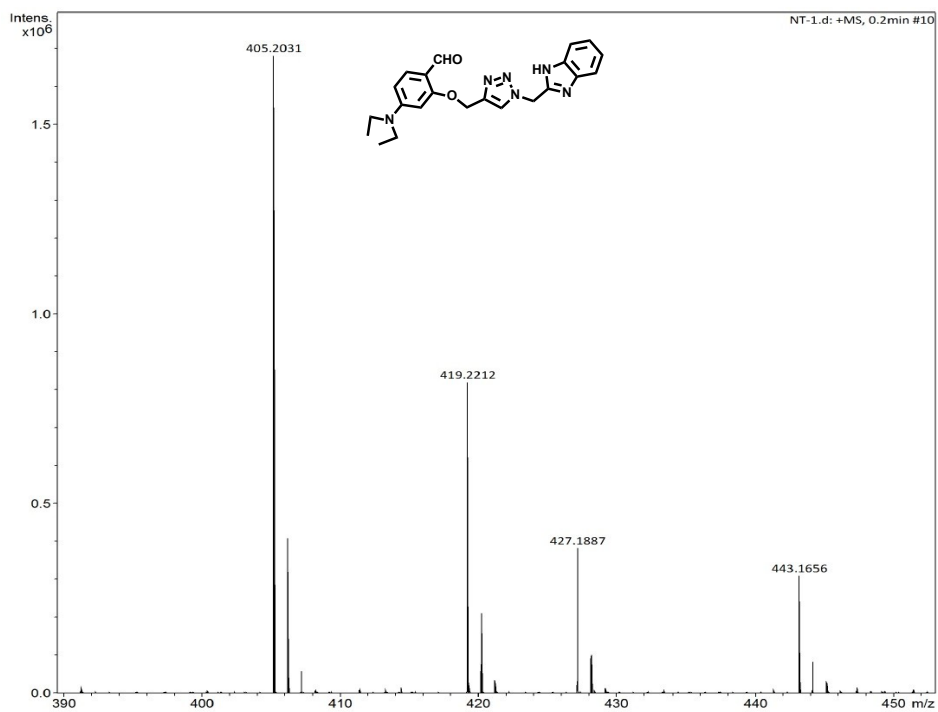

Fig. S22: HRMS

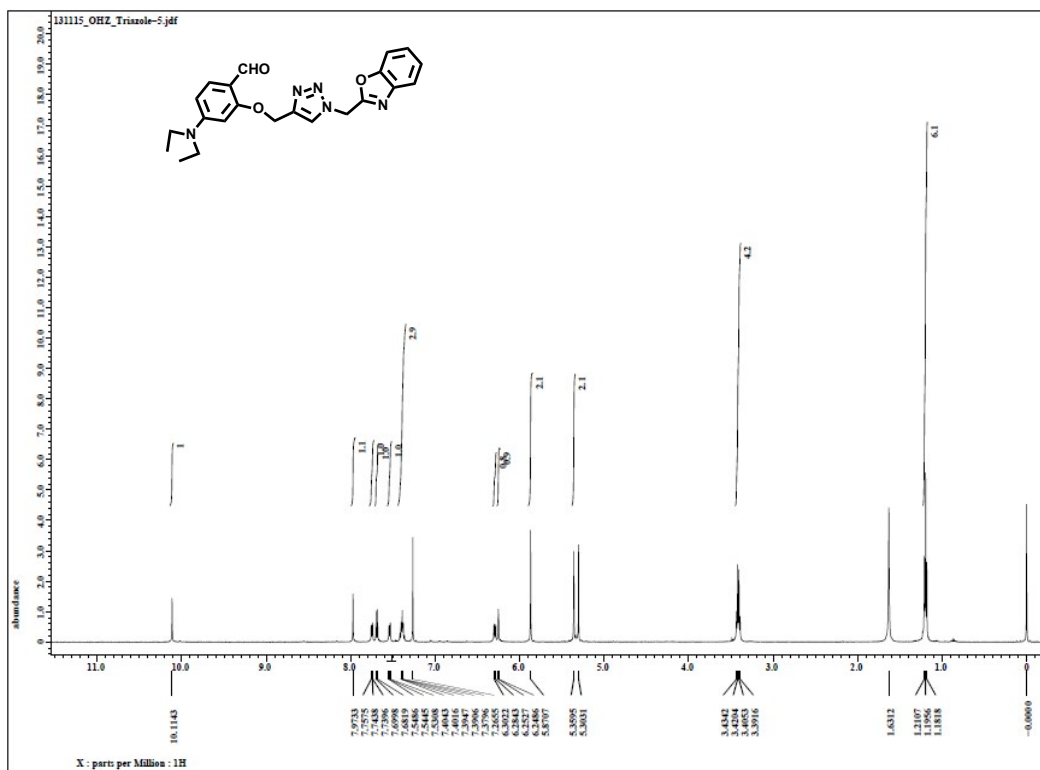

Fig. S23:  $^1\text{H-NMR}$

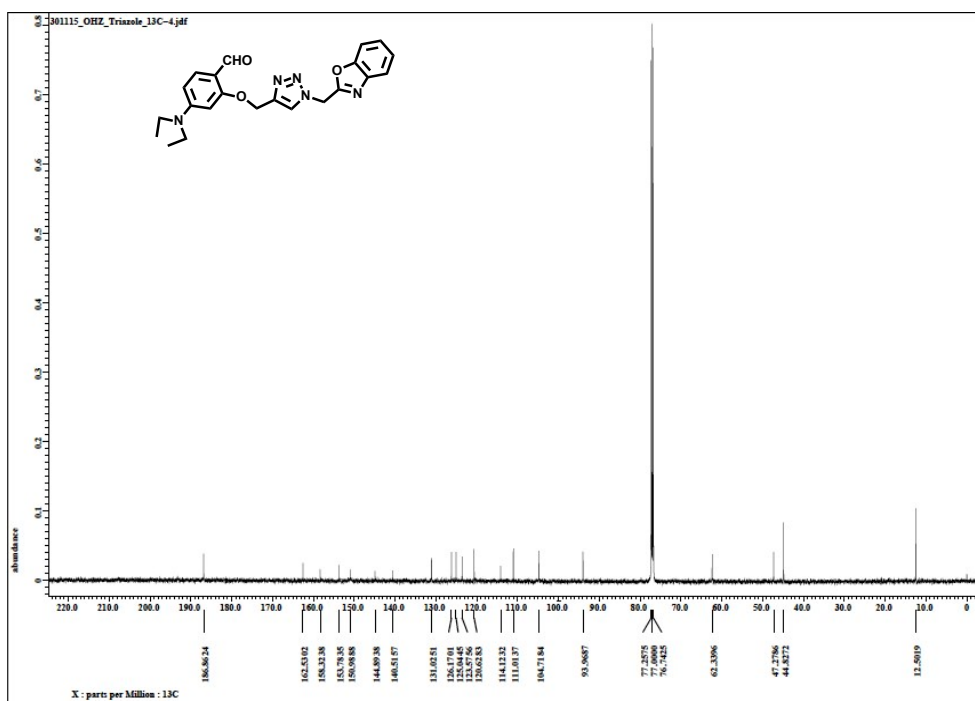

Fig. S24:  $^{13}\text{C-NMR}$

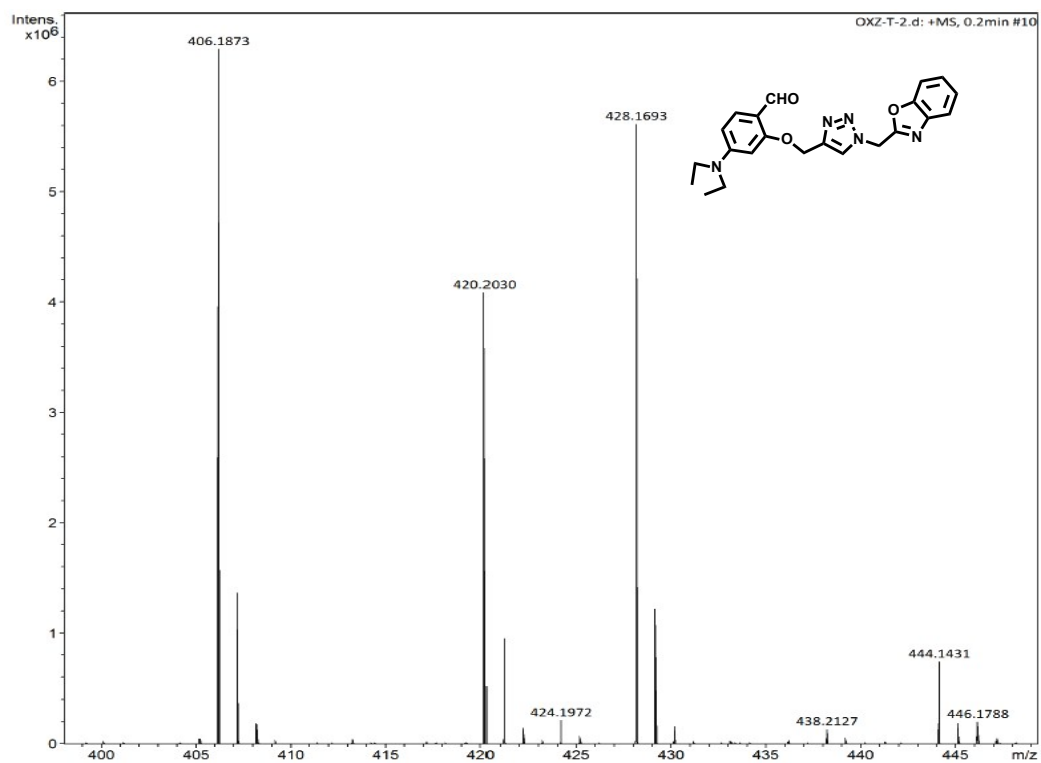

**Fig. S25:** HRMS

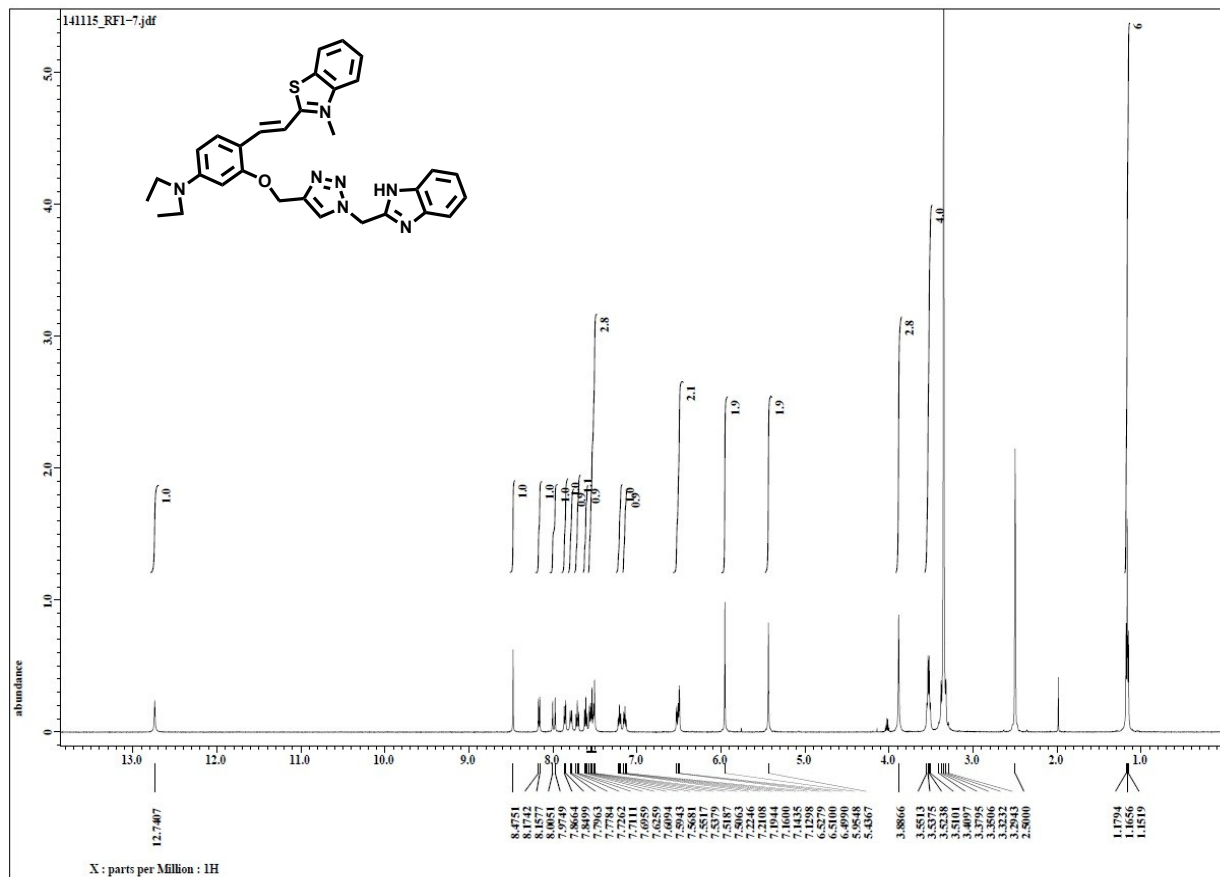

Fig. S26: <sup>1</sup>H-NMR



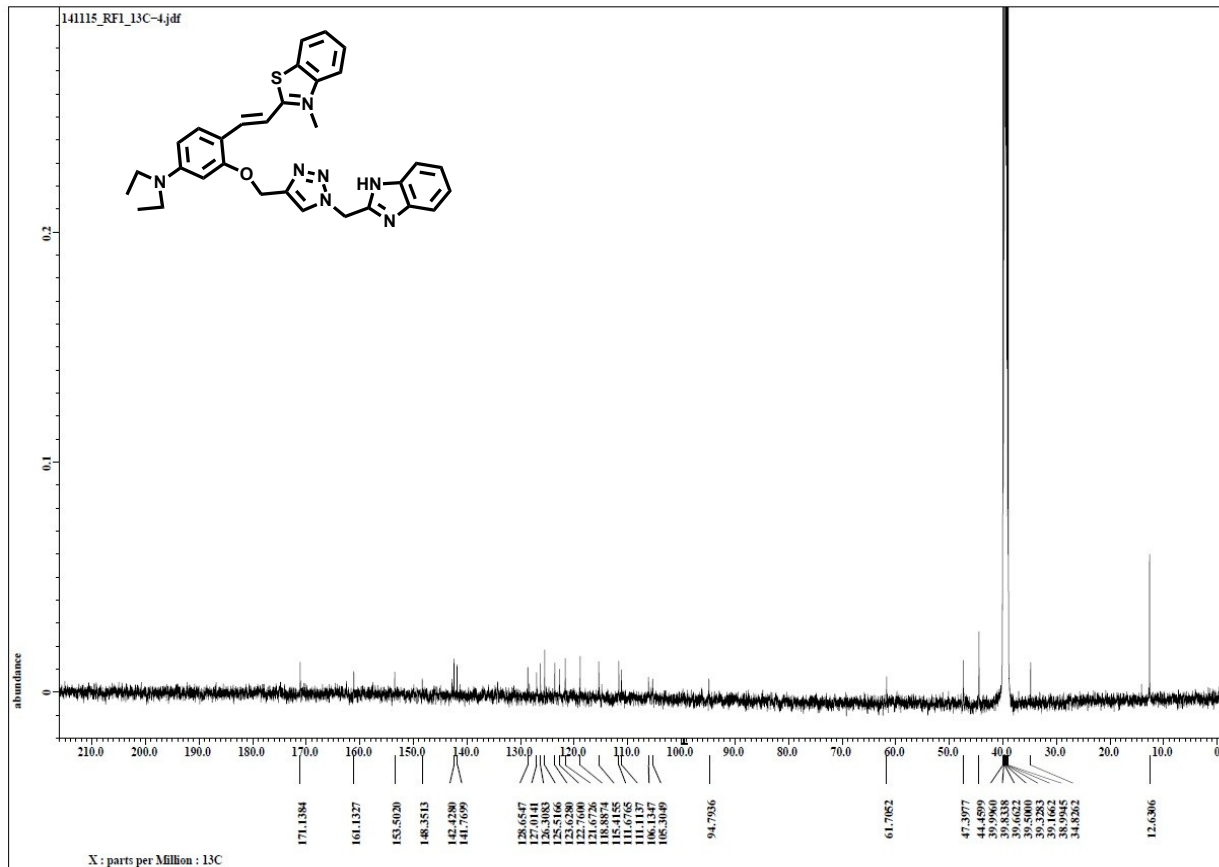

Fig. S27:  $^{13}\text{C}$ NMR

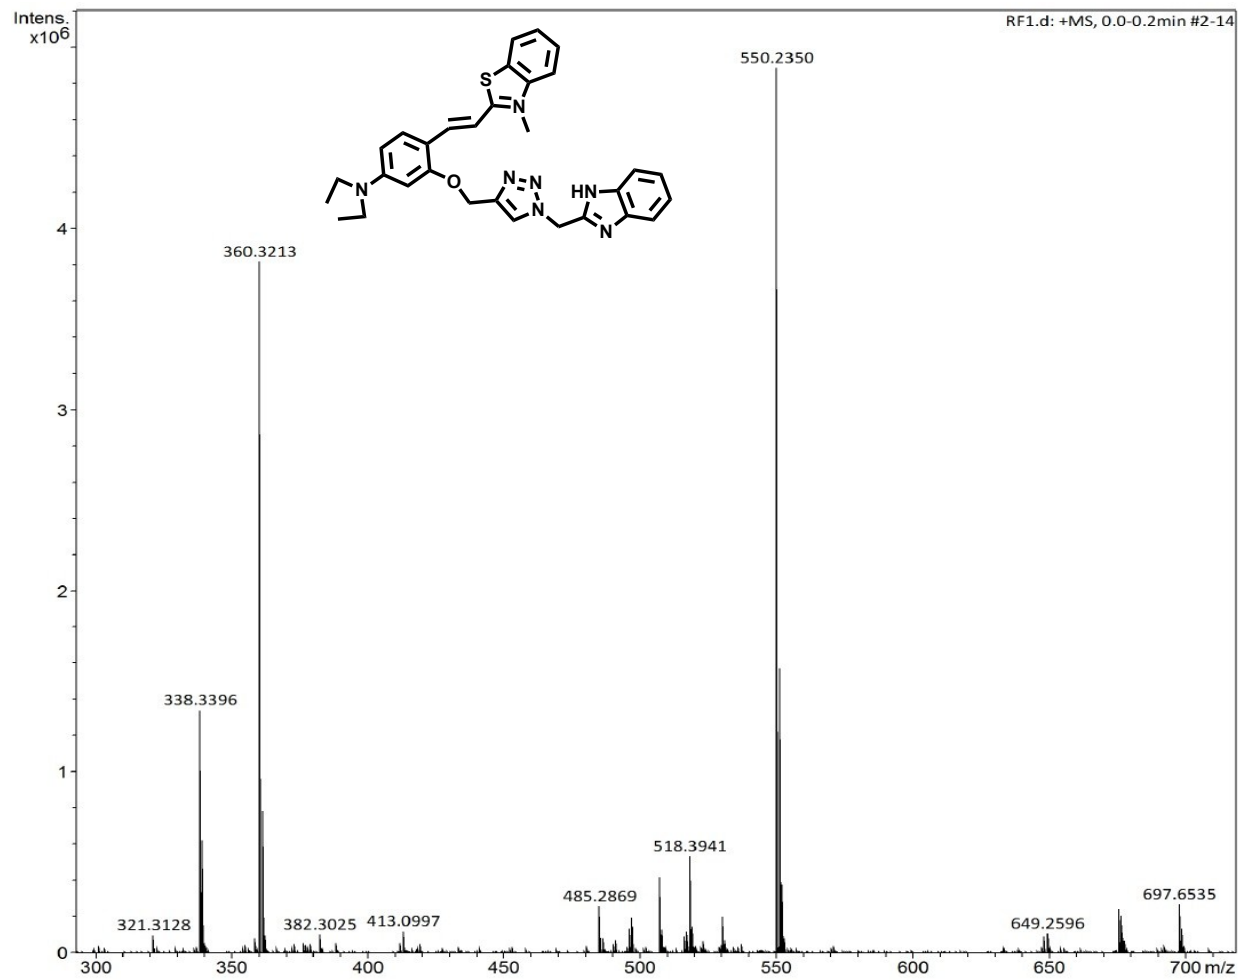

Fig. S28: HRMS

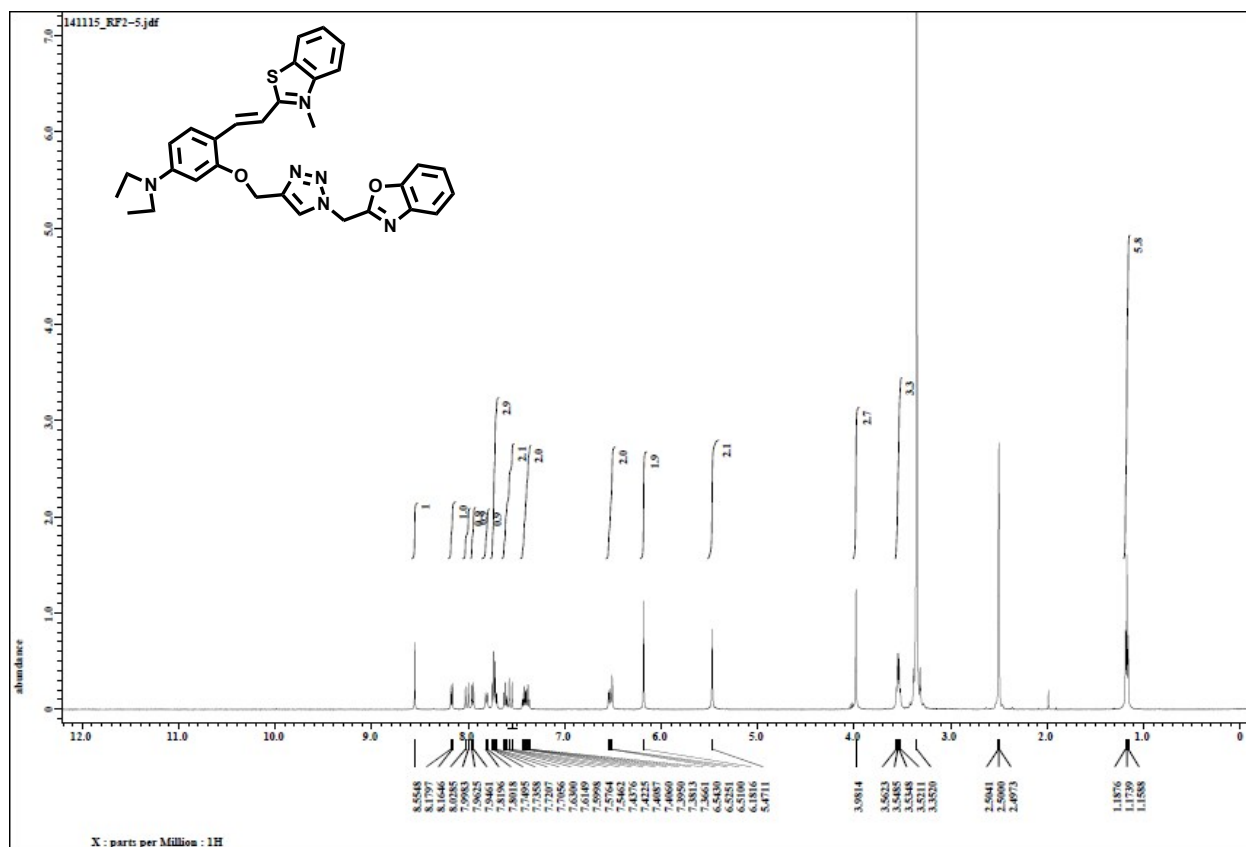

Fig. S29:  $^1\text{H-NMR}$

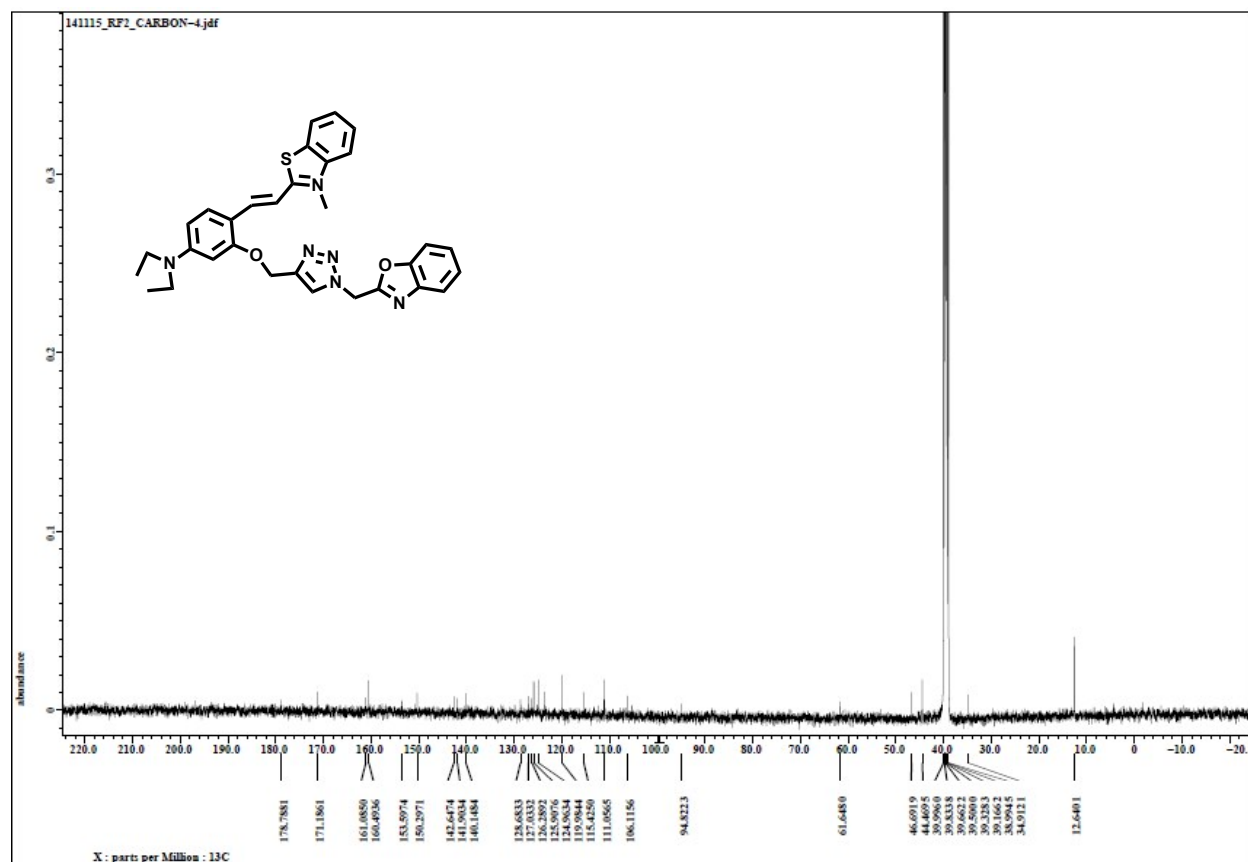

Fig. S30:  $^{13}\text{C}$ NMR

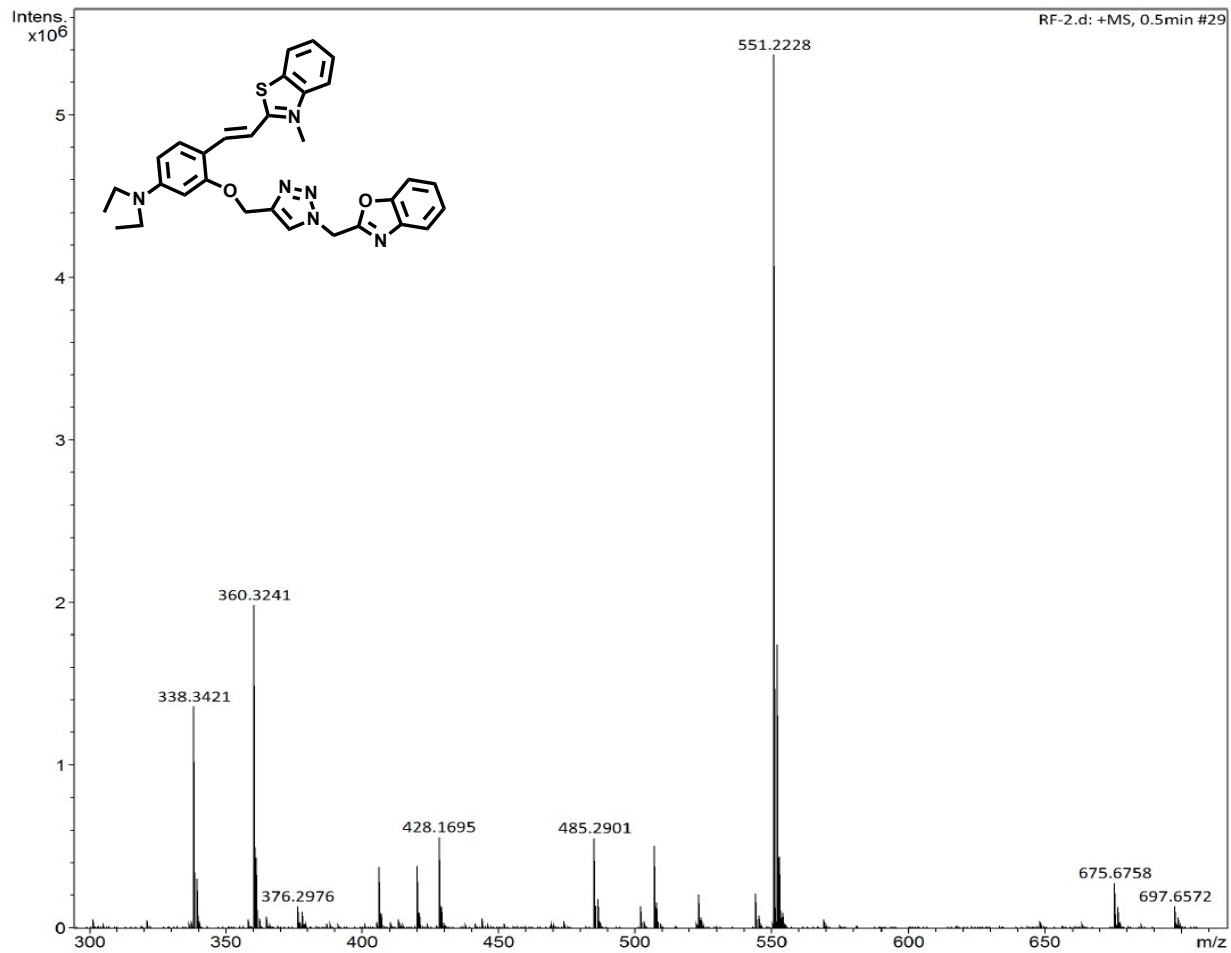

Fig. S31: HRMS

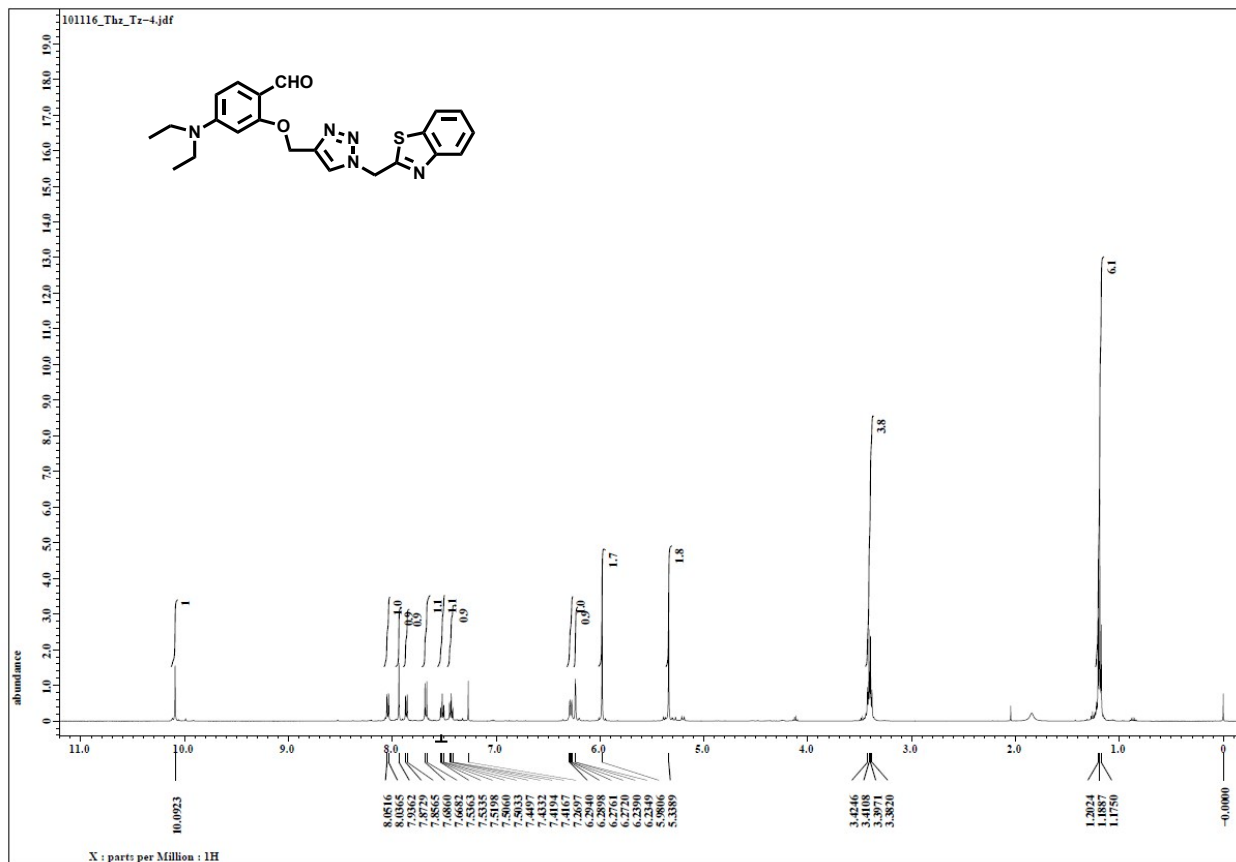

Fig. S32: <sup>1</sup>H-NMR

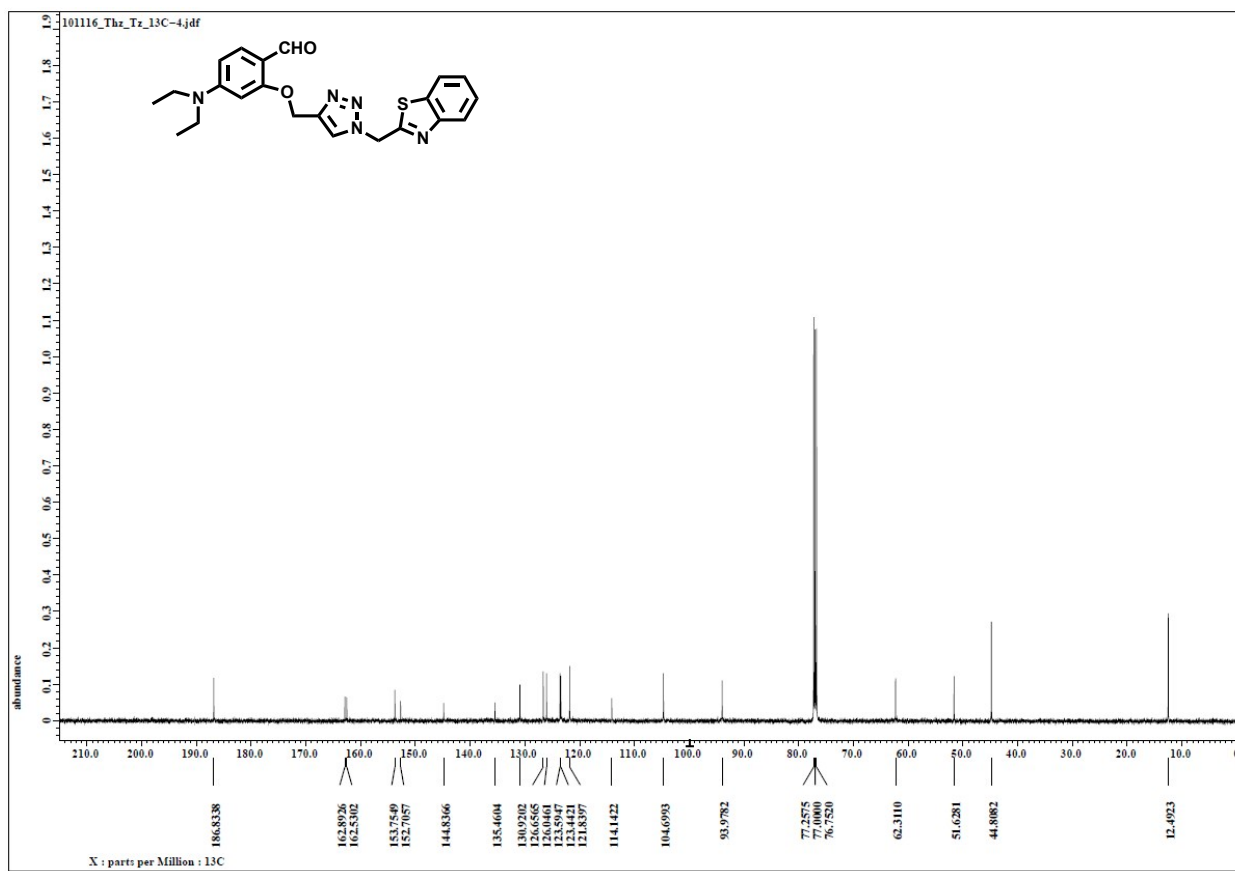

Fig. S33:  $^{13}\text{C}$ NMR

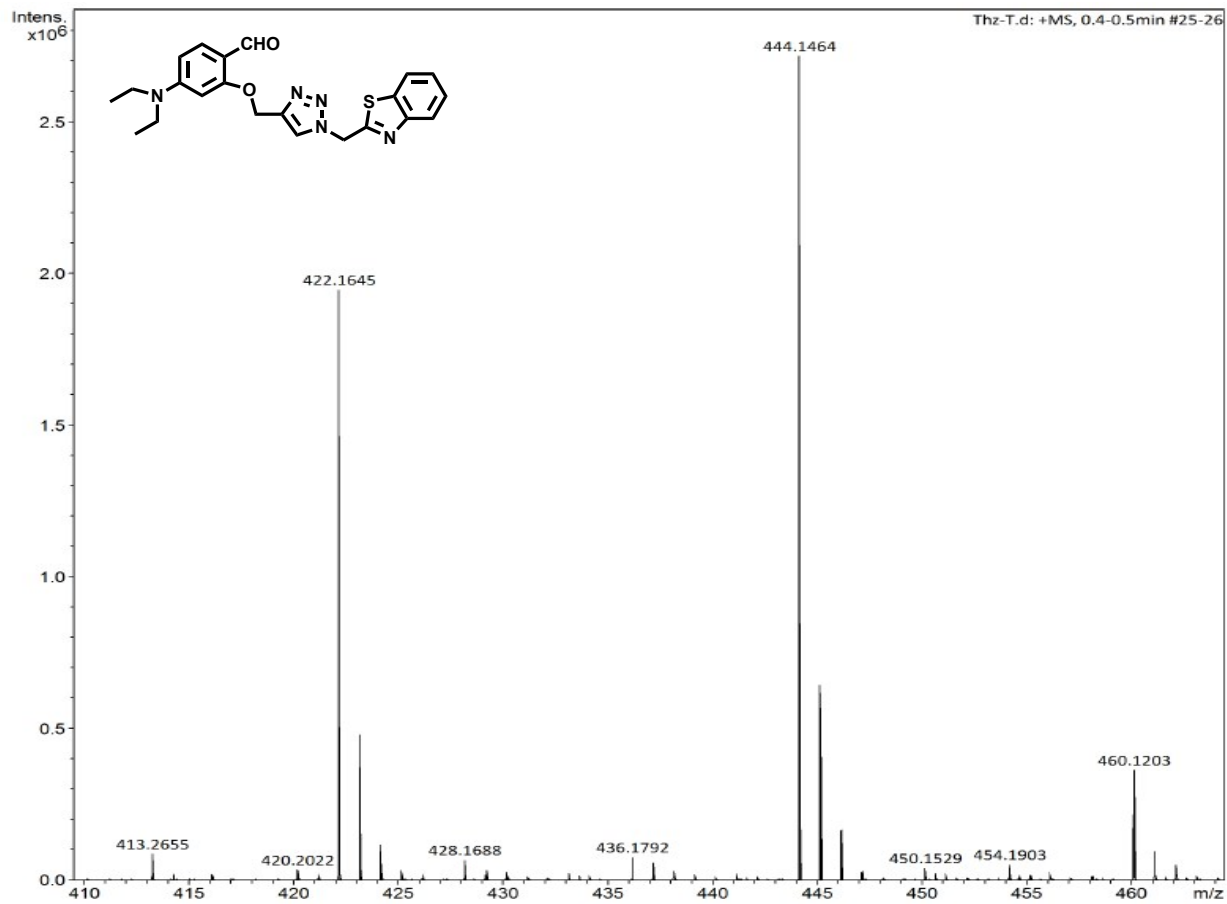

**Fig. S34: HRMS**



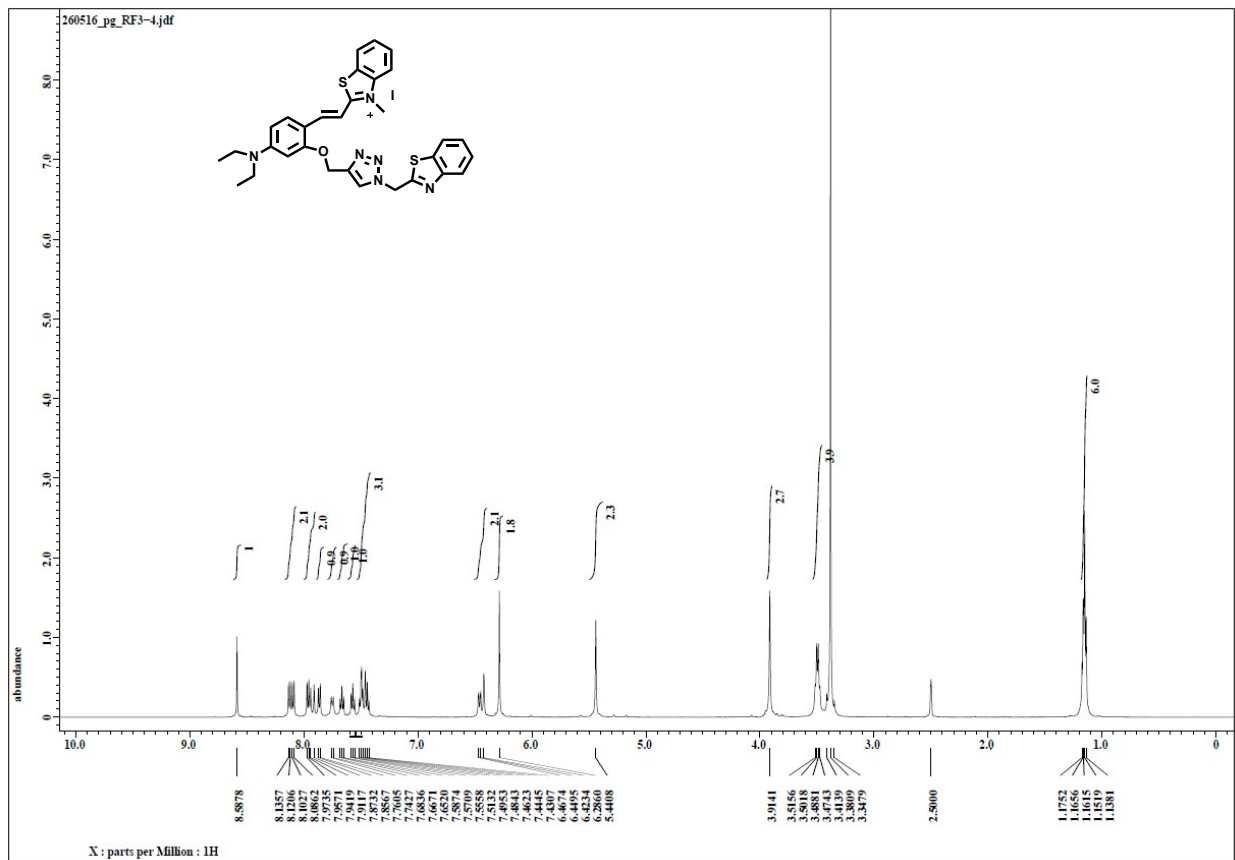

Fig. S35:  $^1\text{H-NMR}$

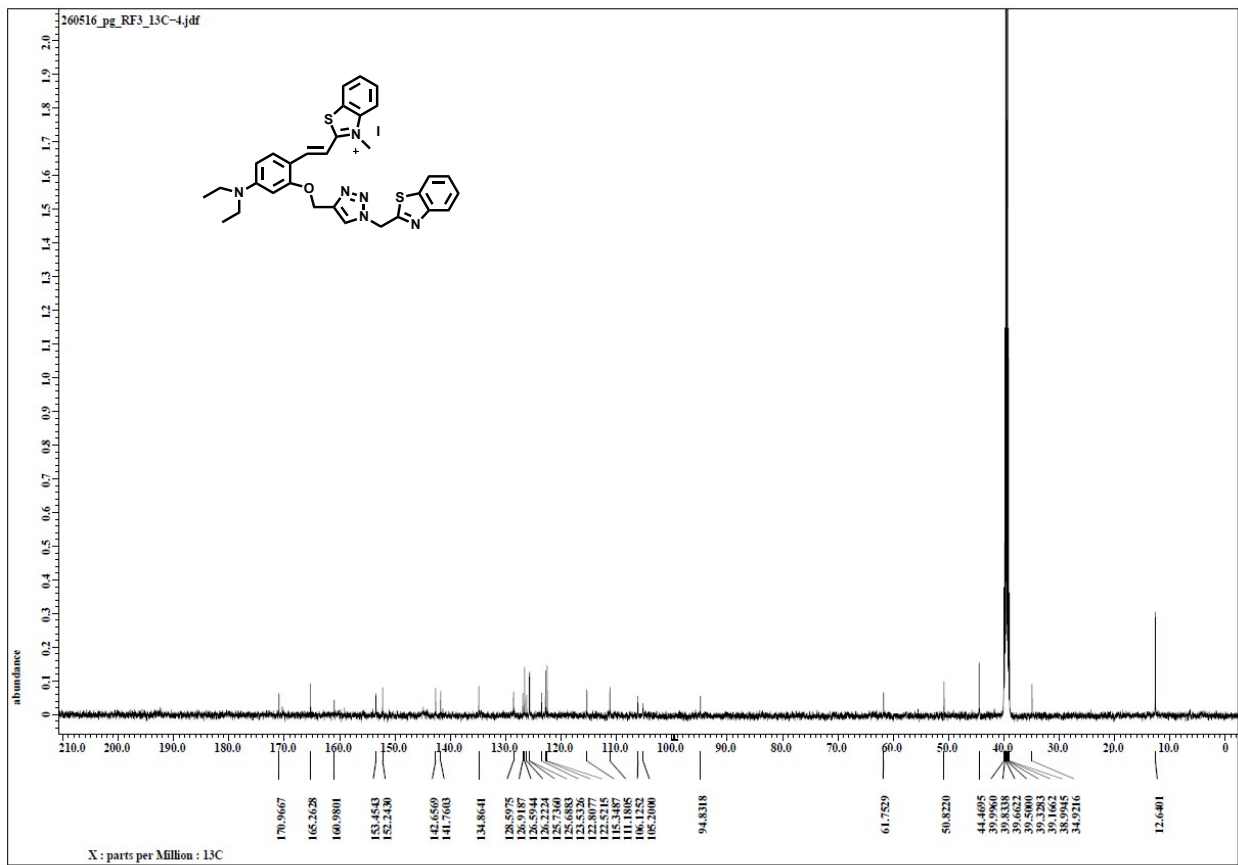

Fig. S36:  $^{13}\text{C}$ NMR

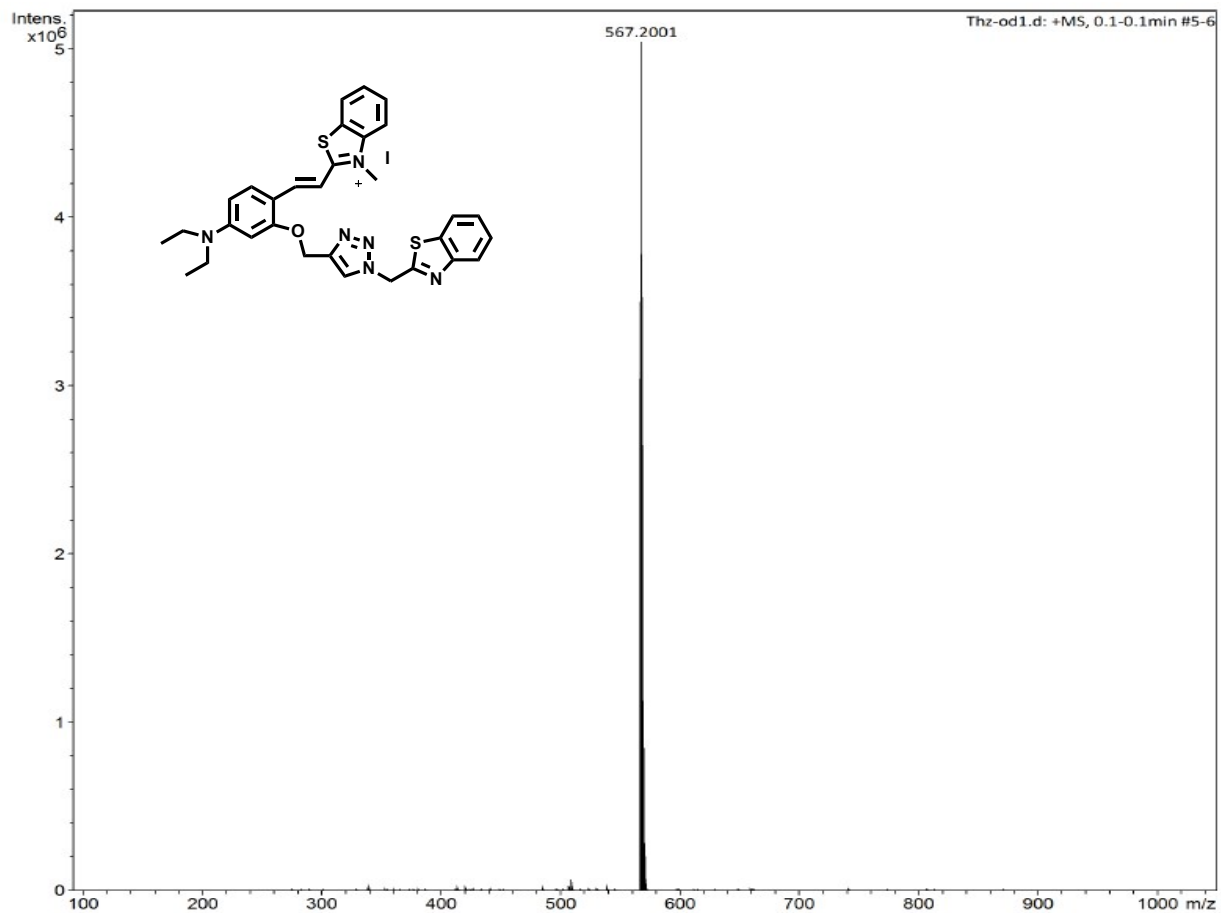

**Fig. S37: HRMS**

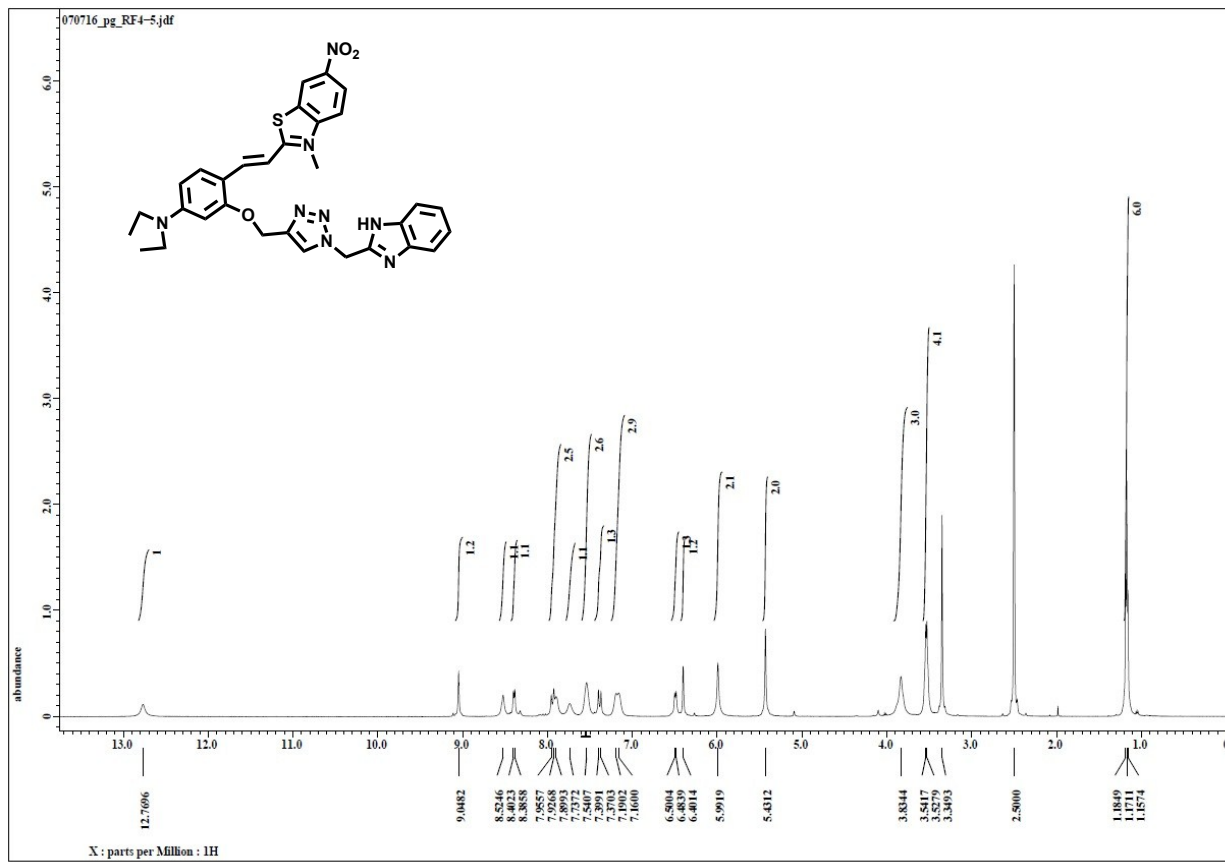

Fig. S38:  $^1\text{H-NMR}$

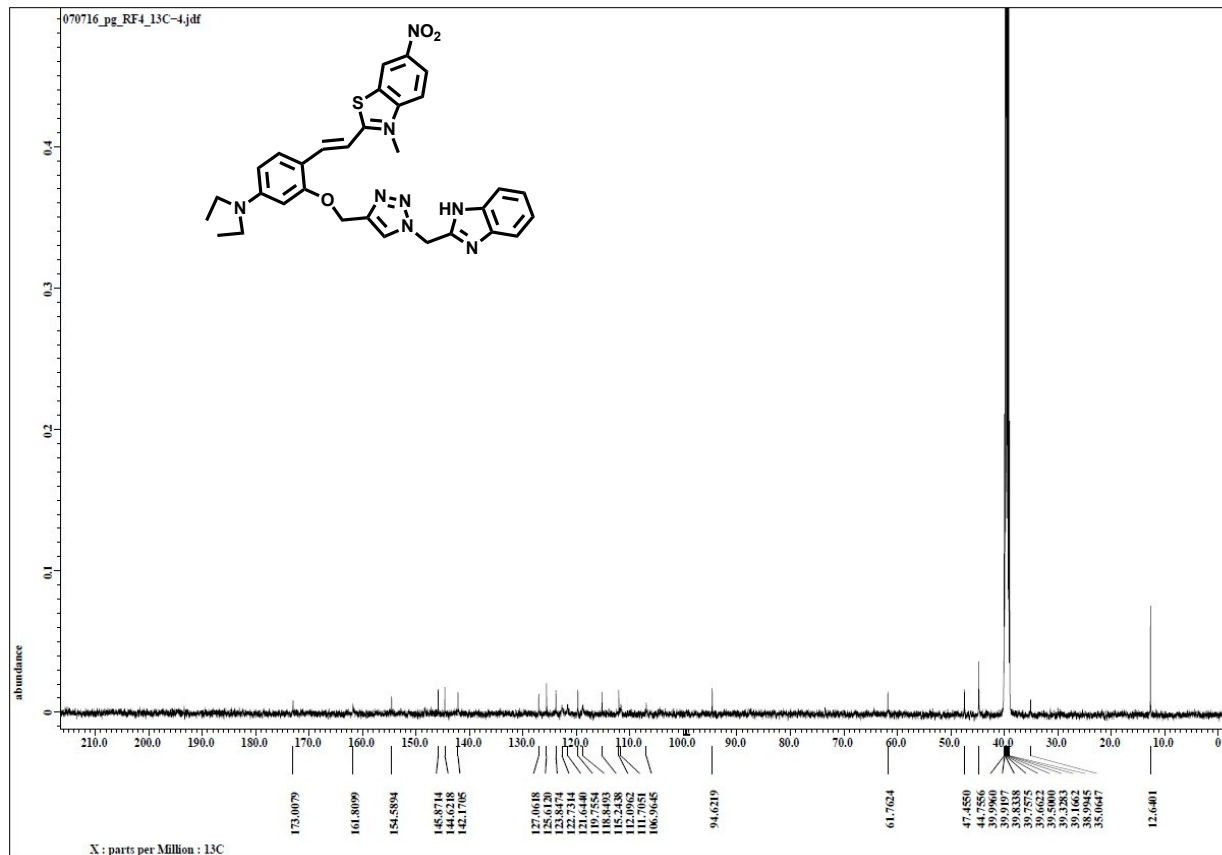

Fig. S39:  $^{13}\text{C}$ NMR

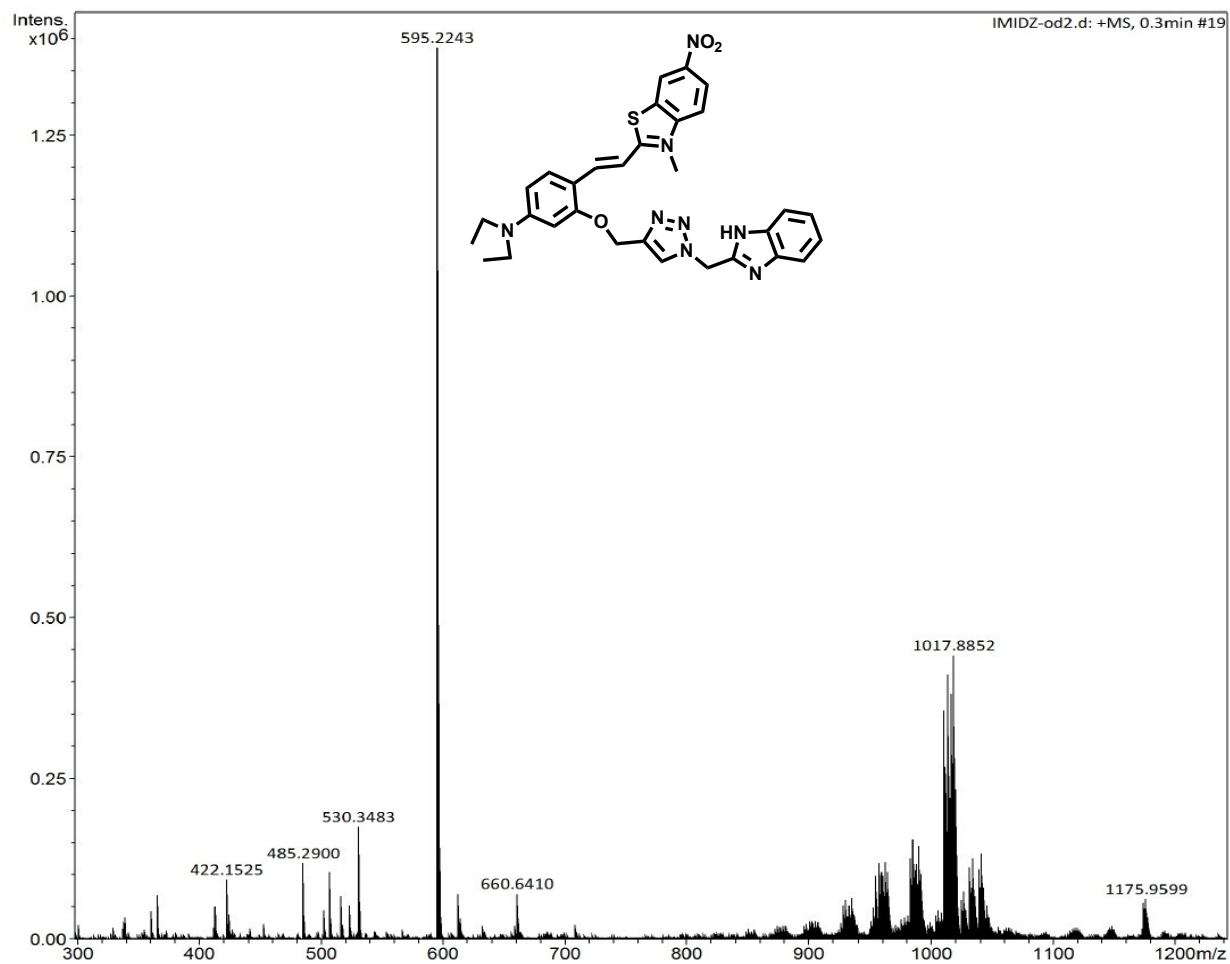

Fig. S40: HRMS

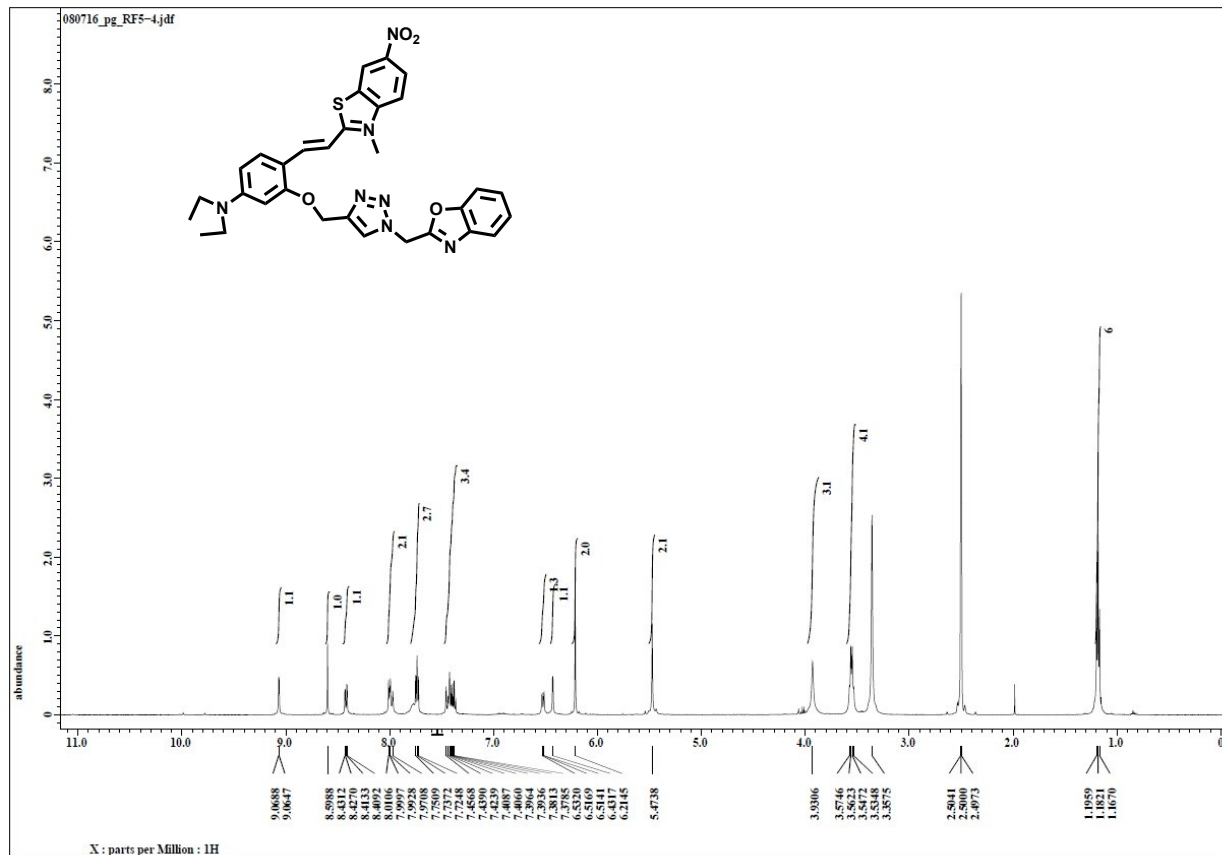

Fig. S41: <sup>1</sup>H-NMR

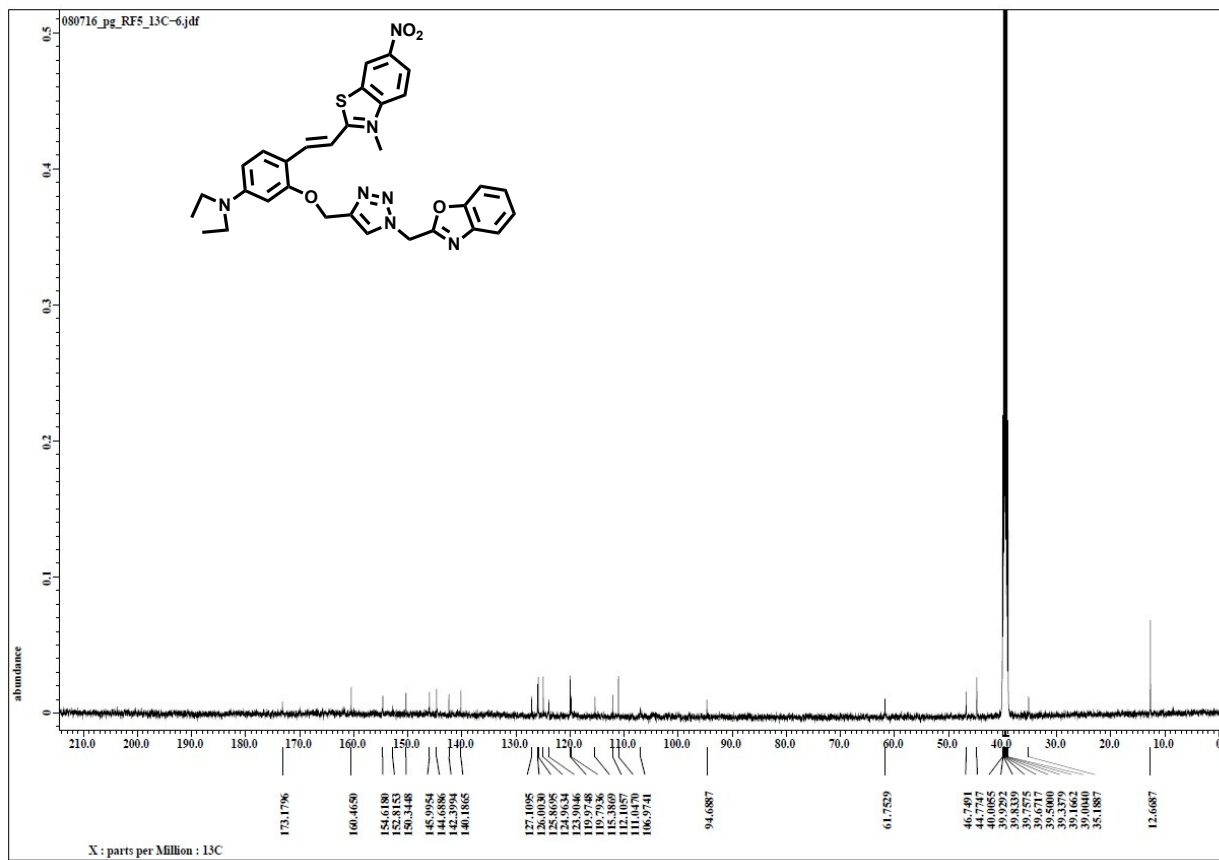

Fig. S42:  $^{13}\text{C}$ NMR



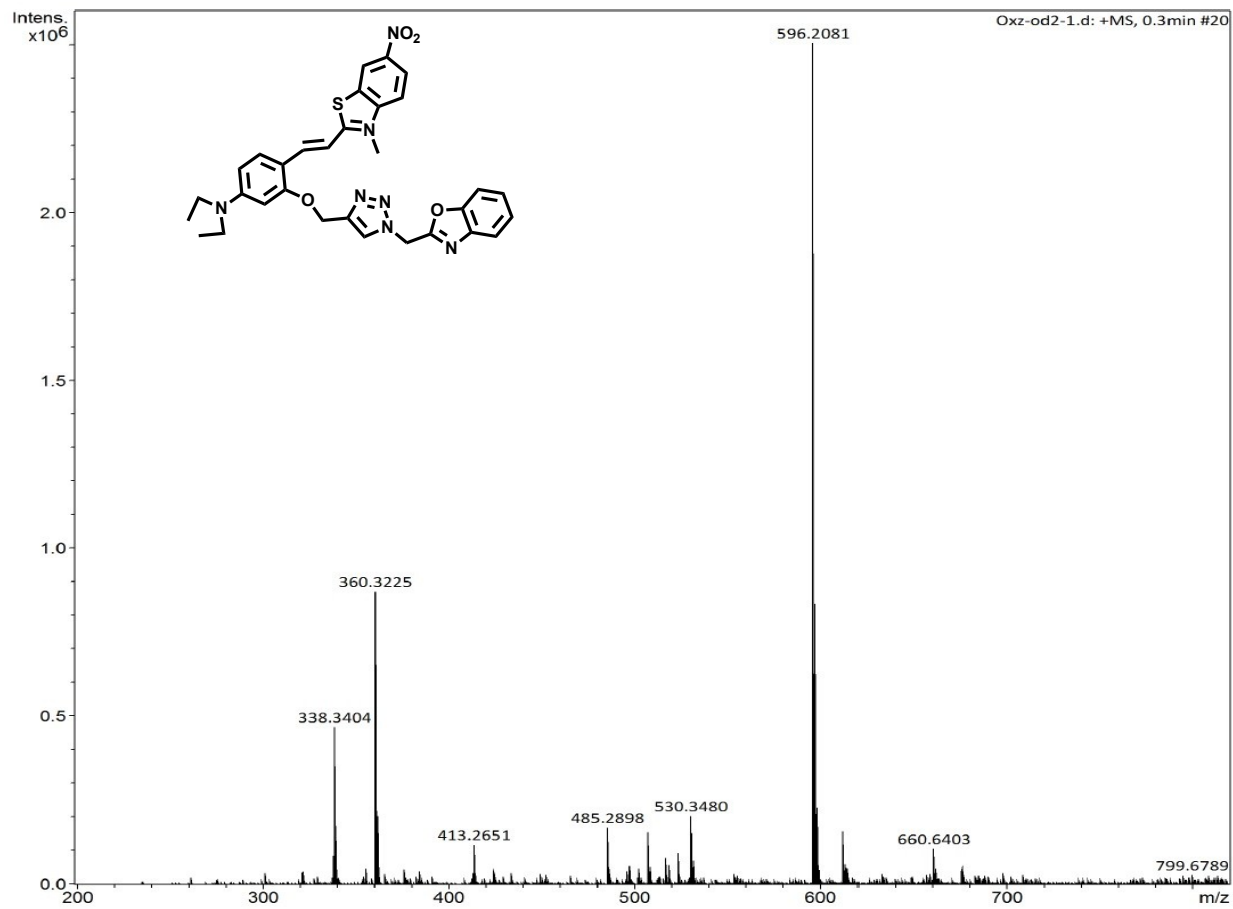

Fig. S43: HRMS

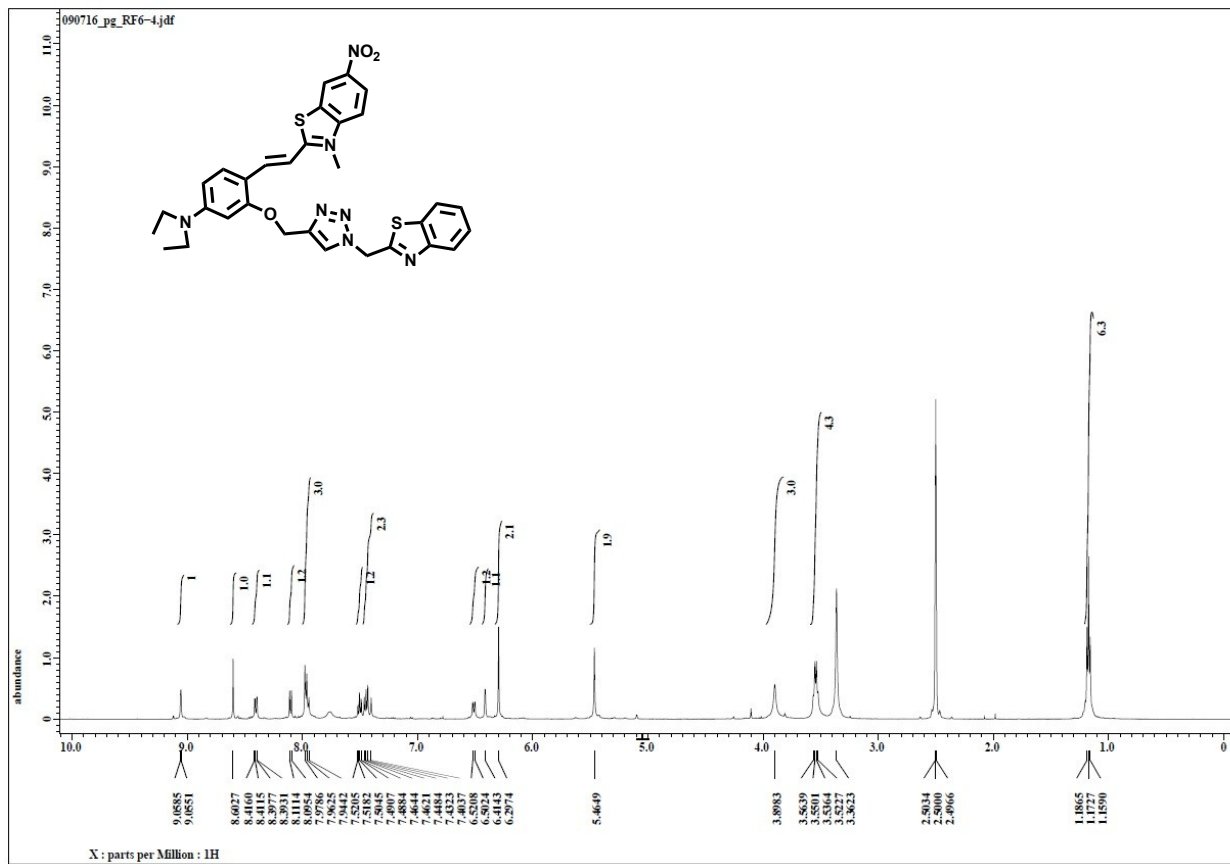

Fig. S44: <sup>1</sup>H-NMR

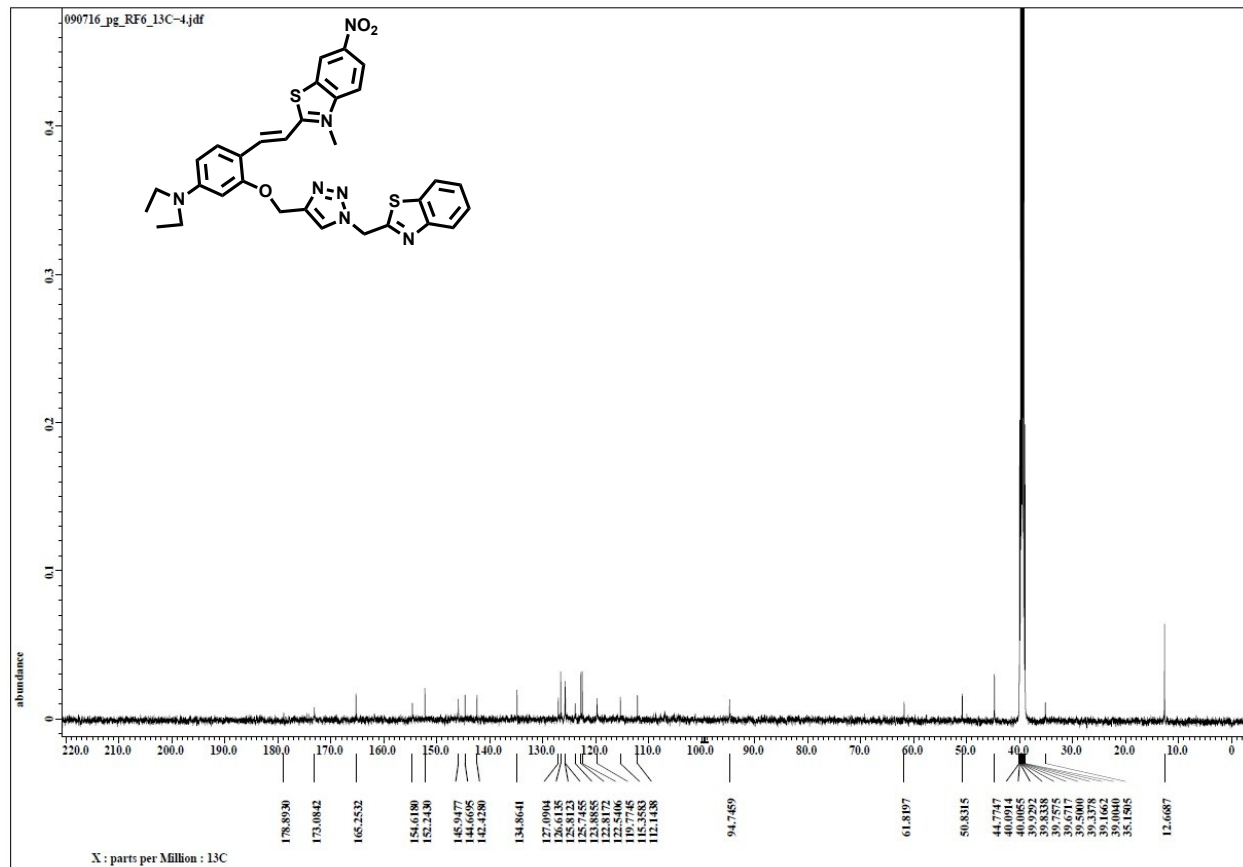

Fig. S45:  $^{13}\text{C}$ NMR

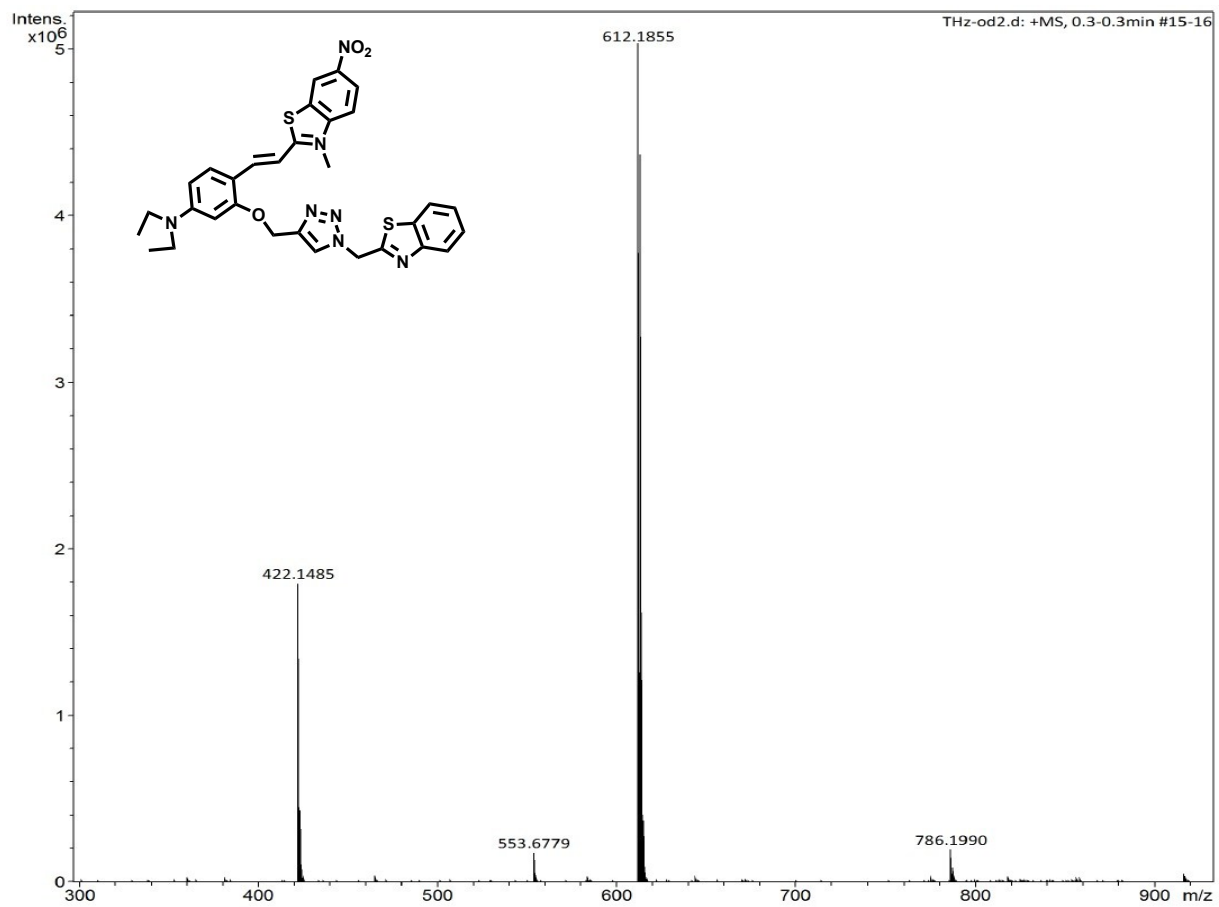

**Fig. S46: HRMS**

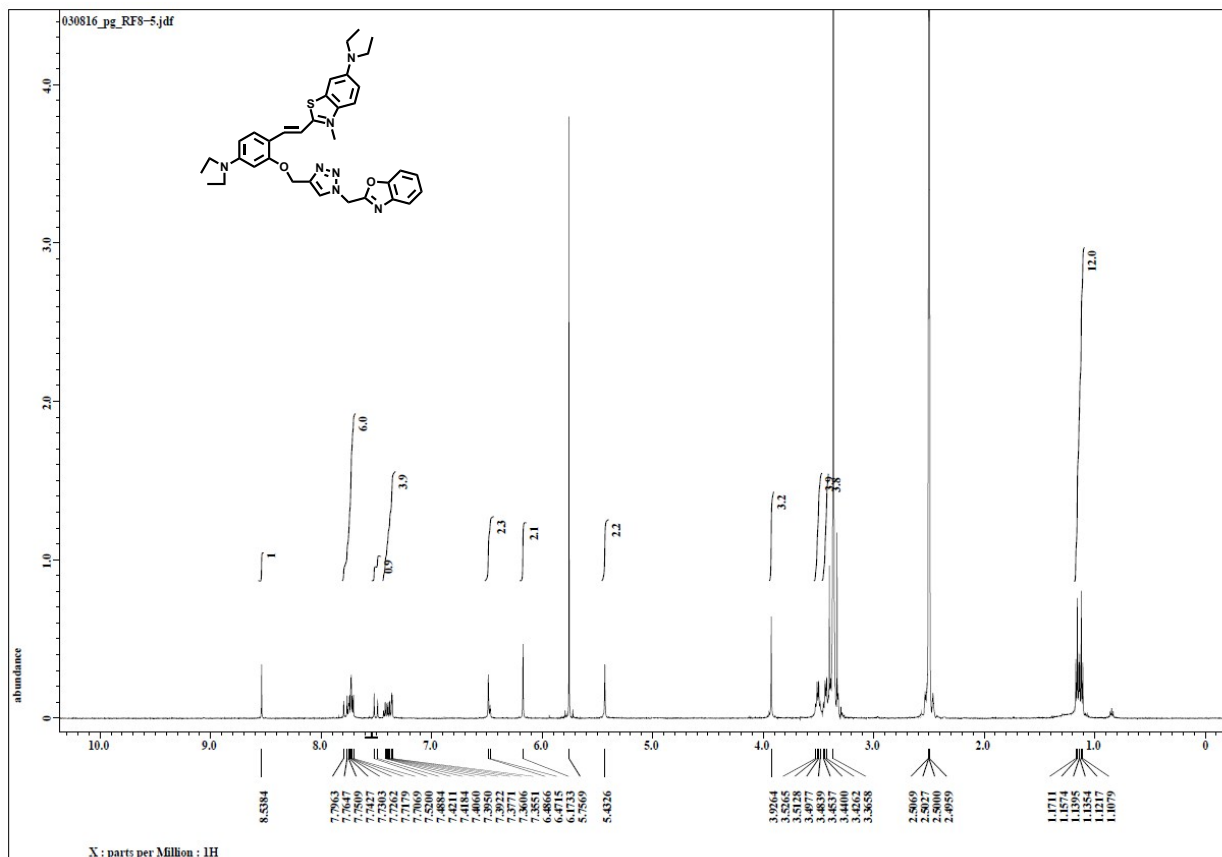

Fig. S47:  $^1\text{H-NMR}$

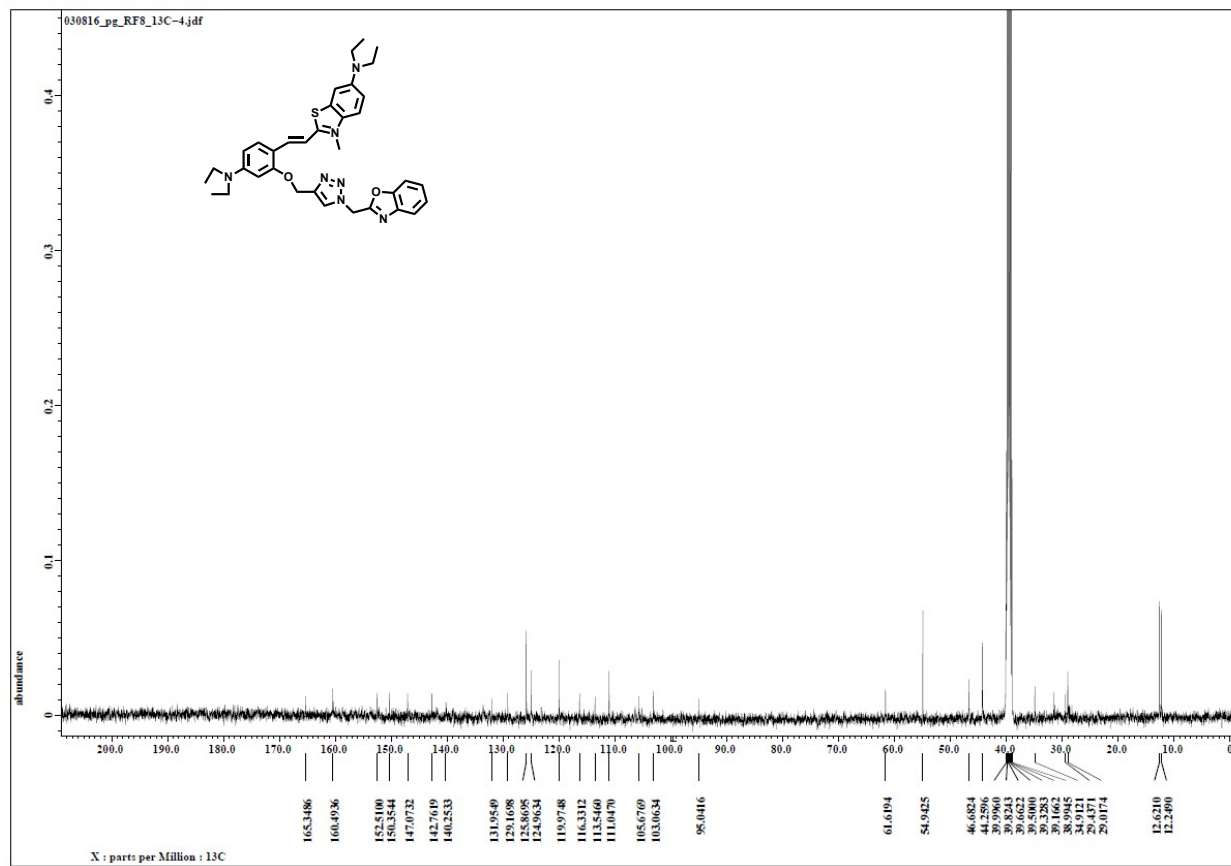

Fig. S48:  $^{13}\text{C}$ NMR

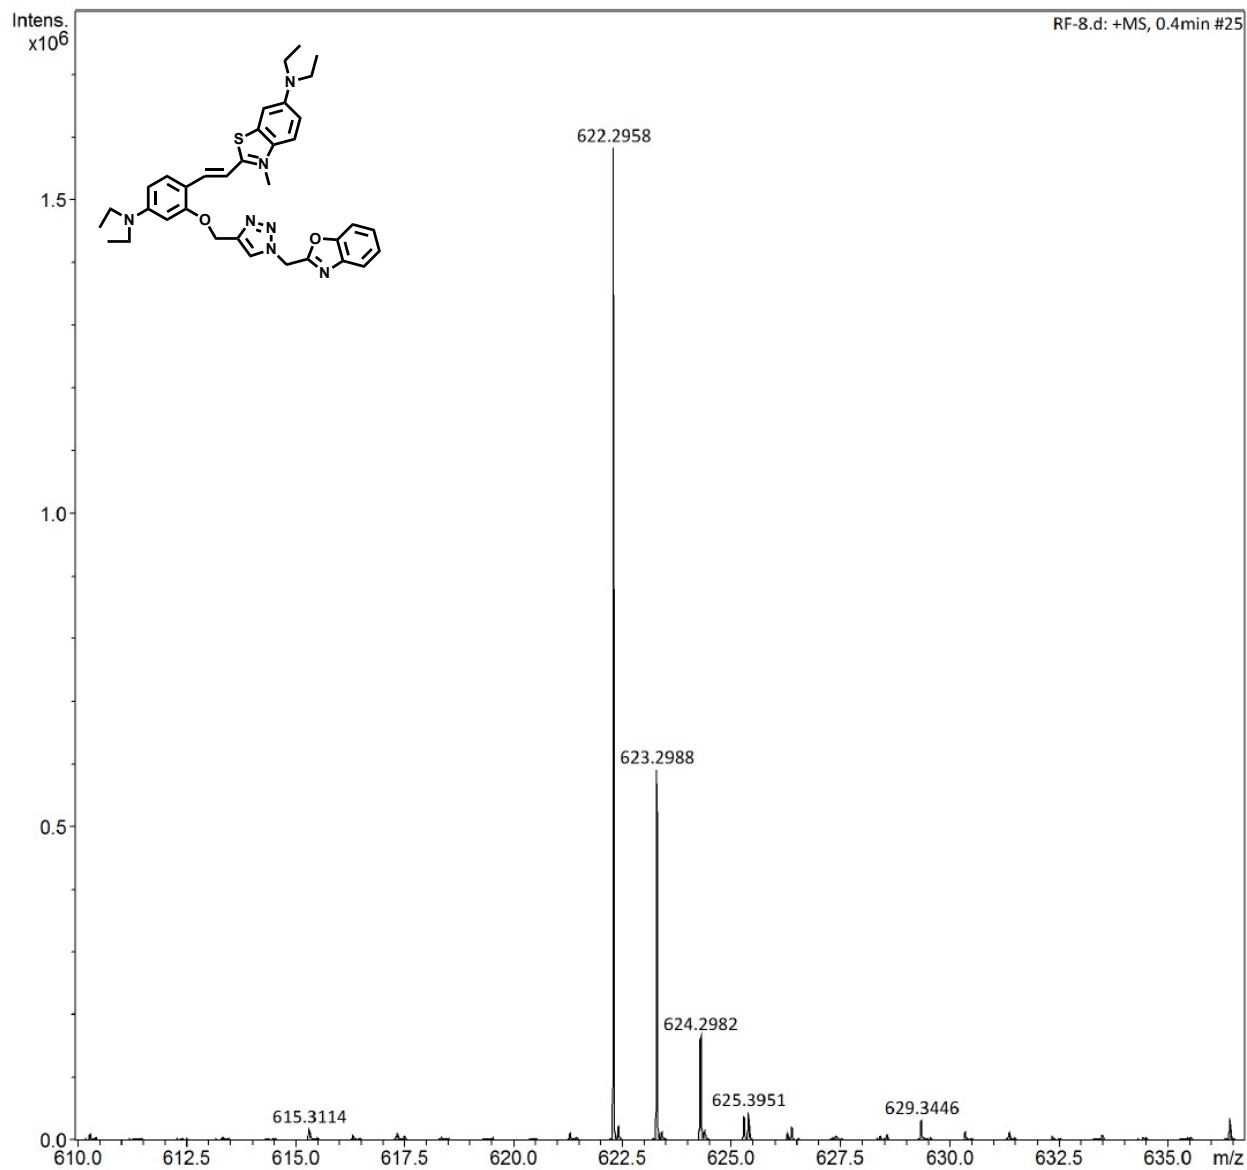

**Fig. S49: HRMS**

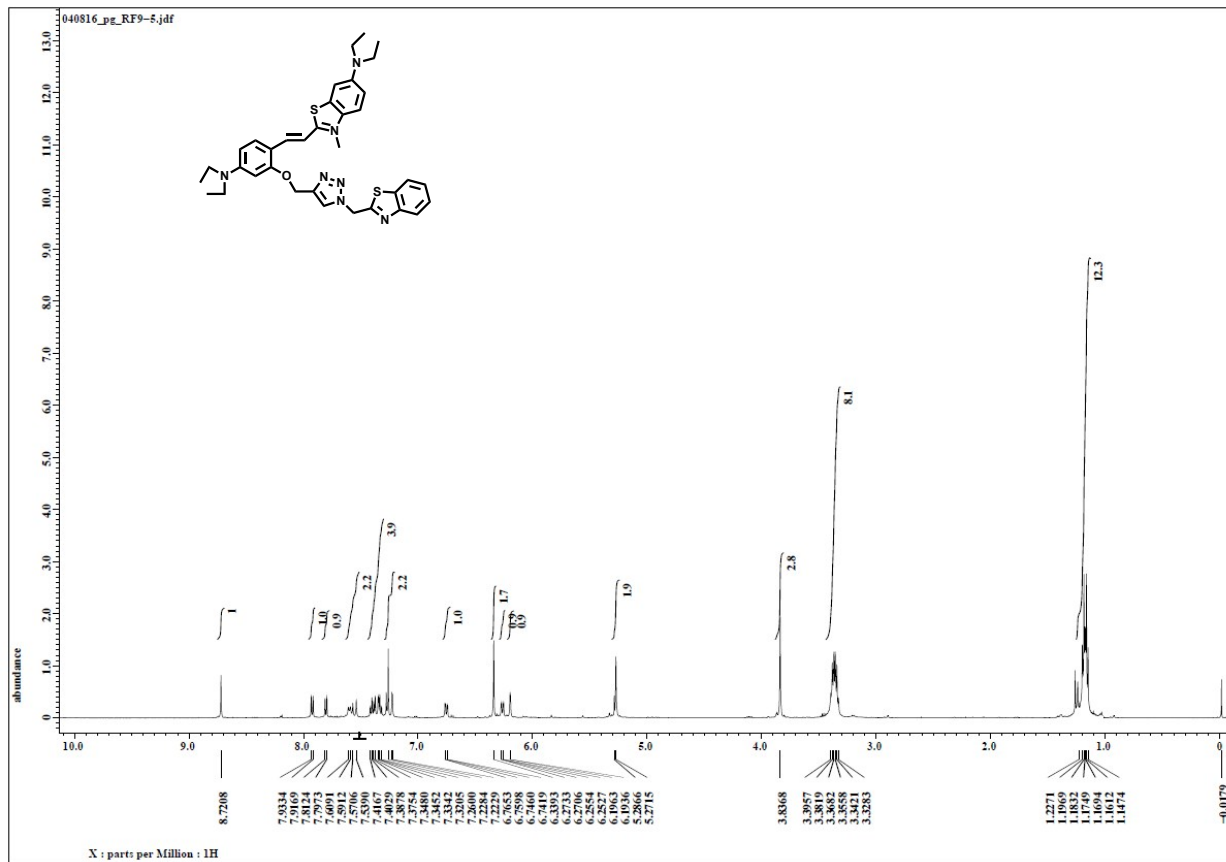

Fig. S50:  $^1\text{H-NMR}$



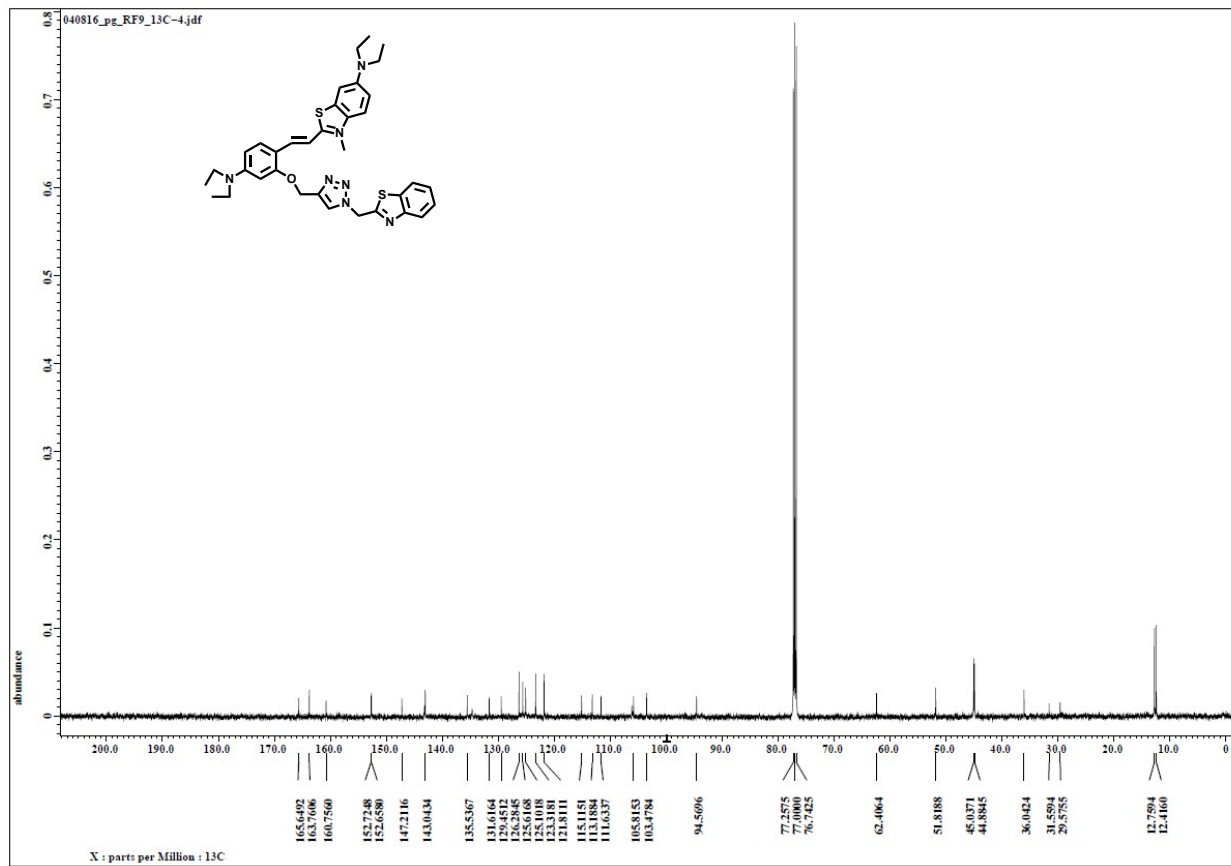

Fig. S51:  $^{13}\text{C}$ NMR

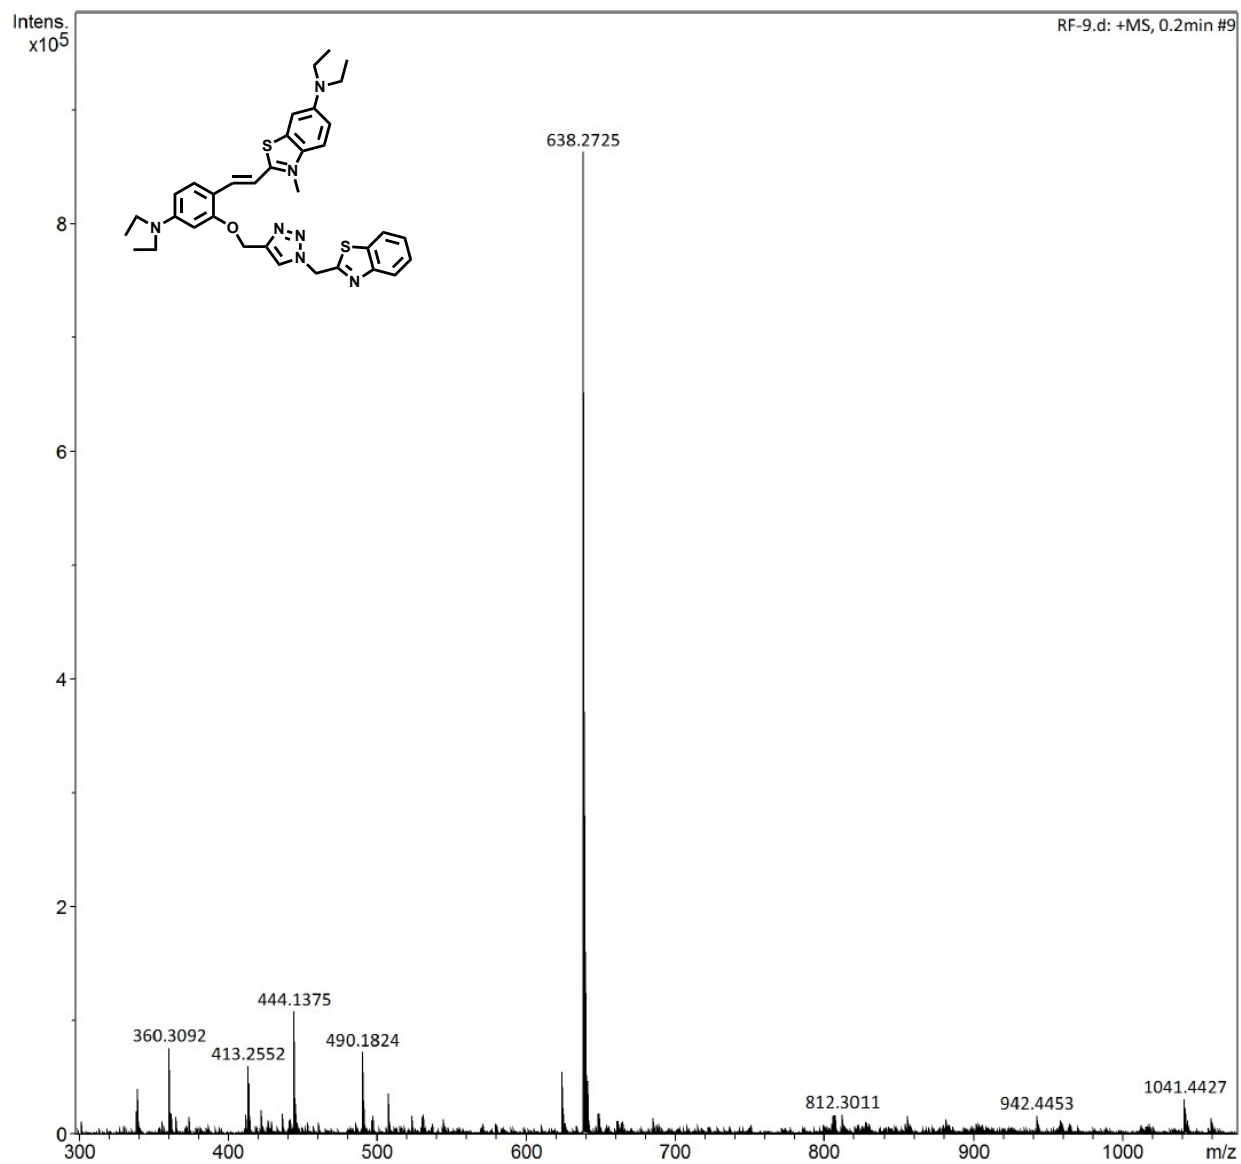

**Fig. S52: HRMS**

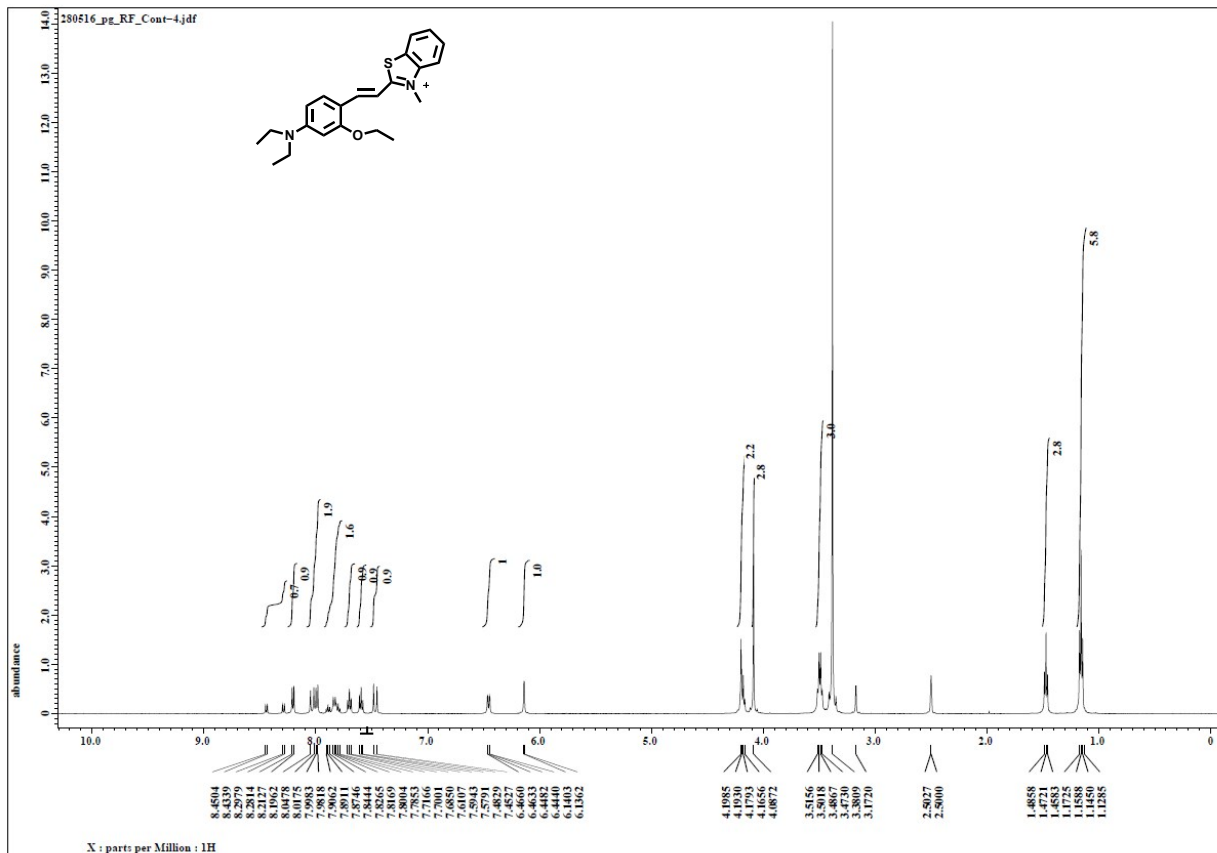

Fig. S53:  $^1\text{H-NMR}$

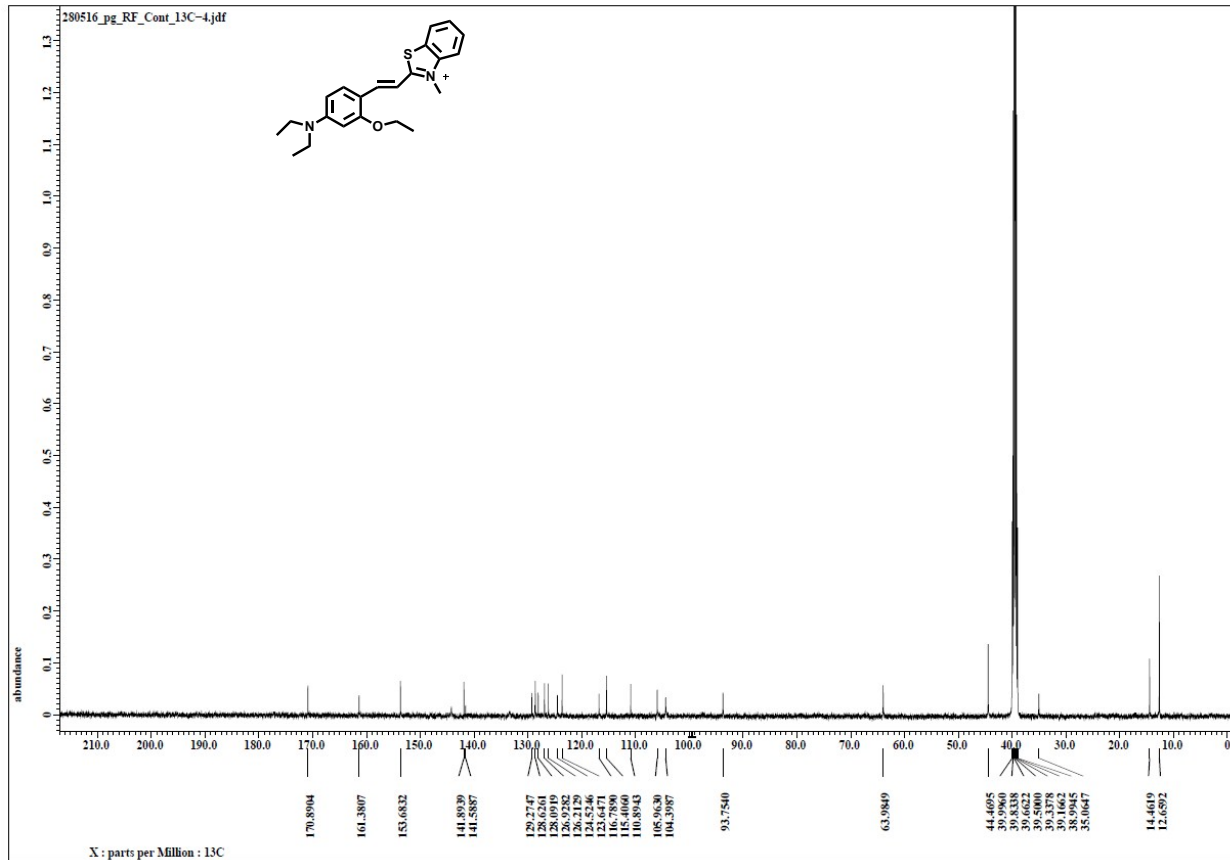

Fig. S54:  $^{13}\text{C}$ NMR

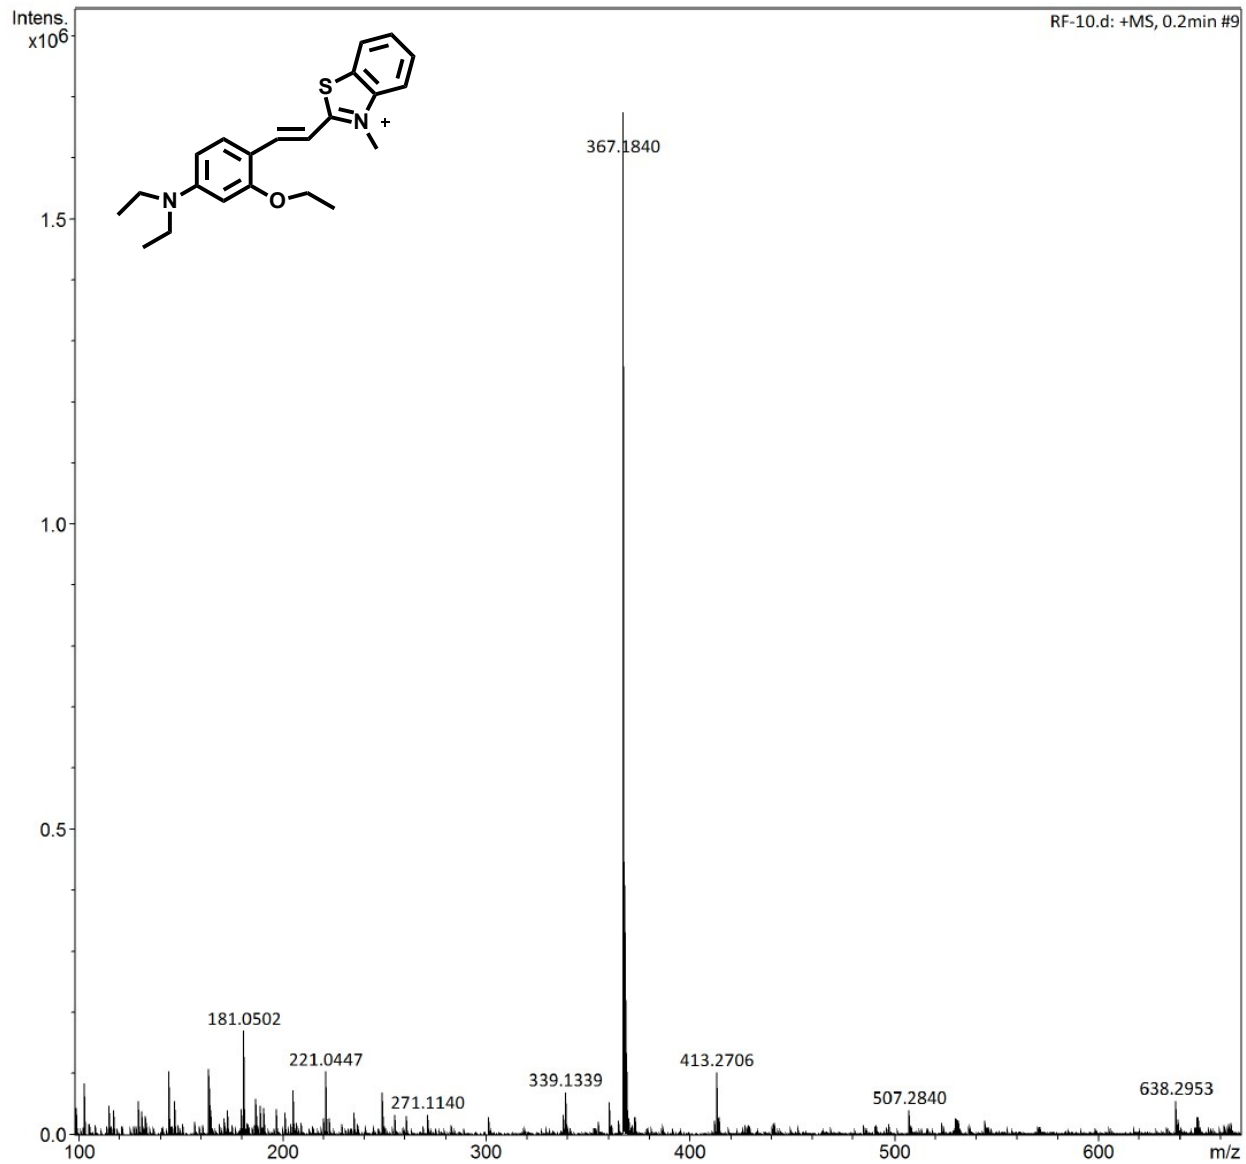

**Fig. S55: HRMS**

## References:

- 1 J. Portugal, D. J. Cashman, J. O. Trent, N. Ferrer-Miralles, T. Przewloka, I. Fokt, W. Priebe and J. B. Chaires, *J. Med. Chem.* 2005, **26**, 8209–8219.
- 2 A. D. Becke, *J. Chem. Phys.* 1993, **98**, 5648–5652.
- 3 C. Lee, W. Yang and R. G. Parr, *Phys. Rev. B.* 1988, **37**, 785–789.
- 4 M. J. Frisch *et al.*, Wallingford, CT, USA, **2009**.
- 5 R. Dennington, T. Keith and J. Millam, *Semichem Inc., Shawnee Mission, KS*, **2009**.
- 6 P. Job, *Ann. Chim.* 1928, **9**, 113-203.
- 7 Y. Zhou, Z.-X. Li, S.-Q. Zang, Y.-Y. Zhu, H.-Y. Zhang, H.-W. Hou and T. C. W. Mak, *Org. Lett.* 2012, **14**, 1214-1217.
- 8 H. A. Benesi and J. H. Hildebrand, *J. Am. Chem. Soc.* 1949, **71**, 2703-2707.
- 9 B. Liu, Y. Pang, R. Bouhenni, E. Duah, S. Paruchuri and L. MacDonald, *Chem. Commun.* 2015, **51**, 11060-11063.
- 10 G. Dey, P. Gaur, R. Giri and S. Ghosh, *Chem. Commun.* 2016, **52**, 1887-1890.
- 11 C. C. Woodroffe, R. Masalha, K. R. Barnes, C. J. Frederickson and S. J. Lippard, *Chem. Biol.* 2004, **11**, 1659-1666.
- 12 P. R. Bohlander and H.-A. Wagenknecht, *Org. Biomol. Chem.* 2013, **11**, 7458-7462.
- 13 K. Bielawski, S. Wolczynski and A. Bielawska, *Biol. Pharm. Bull.* 2001, **24**, 704-706.
- 14 (a) T. Wang, M. Wang, C. Dinga and J. Fu, *Chem. Commun.* 2014, **50**, 12469-12472; (b) Y. Hao and Y. Chen, *Dyes Pigm.* 2016, **129**, 186-190; (c) A. Gellis, N. Boufatah and P. Vanelle, *Green Chem.* 2006, **8**, 483–487
- 15 Y. Zhang, J. Wang, P. Jia, X. Yu, H. Liu, X. Liu, N. Zhao and B. Huang, *Org. Biomol. Chem.* 2010, **8**, 4582-4588.
- 16 V. Hrobarikov, P. Hrobarik, P. Gajdo, I. Ftilis, M. Fakis, P. Persephonis and P. Zahradnik, *J. Org. Chem.* 2010, **75**, 3053–3068.
- 17 B. Chiranjeevi, B. Vinayak, T. Parsharamulu, V. S. PhaniBabu, B. Jagadeesh, B. Sridhar and M. Chandrasekharam, *Eur. J. Org. Chem.* 2014, 7839–7849
- 18 J. Gu, U. R. Anumala, F. Lo Monte, T. Kramer, R. Heyny von Haußen, J. Hölzer, V. Goetschy-Meyer, G. Mall, I. Hilger, C. Czech and B. Schmidt, *Bioorg. Med. Chem. Lett.* 2012, **22**, 7667-7671.
- 19 M. S. Mayo, X. Yu, X. Zhou, X. Feng, Y. Yamamoto and M. Bao, *Org. Lett.* 2014, **16**, 764-767.
